# Supplementary material for: Acid-catalyzed synthesis of condensed polycyclic diaryl ethers from arenols
Source: Royal Society of Chemistry journal article supplement (doi:10.1039/c9cc07172e), 2019-01-01

# Acid-Catalyzed Synthesis of Condensed Polycyclic Diaryl Ethers from Arenols

Saori Tanii, Mieko Arisawa\*, and Masahiko Yamaguchi\*

Department of Organic Chemistry, Graduate School of Pharmaceutical Sciences,  
Tohoku University, Sendai, 980-8578, Japan

E-mail: mieko.arisawa.d2@tohoku.ac.jp, masahiko.yamaguchi.c8@tohoku.ac.jp

## Table of Contents

|           |                                                         |
|-----------|---------------------------------------------------------|
| Page 2    | Supplementary Materials                                 |
| Page 2-4  | Typical procedures and The Spectral and Analytical Data |
| Page 5    | References                                              |
| Page 6-29 | NMR Spectra                                             |

## Supplementary Materials

$^1\text{H}$ ,  $^{13}\text{C}$  and  $^{19}\text{F}$  nuclear magnetic resonance (NMR) spectra were recorded on a Varian Mercury (400 MHz), calibrated using trimethylsilane (TMS,  $\delta$  0.00 ppm), residual undeuterated solvent as an internal reference ( $\text{CHCl}_3$ ,  $\delta$  77.0 ppm), and trifluoroacetic acid (TFA,  $\delta$  -79.0 ppm). IR spectra were measured on a JASCO FT/IR-410 spectrophotometer. Melting points were determined with a Yanagimoto micro melting point apparatus without correction. High- and low-resolution mass spectra were measured on a JEOL JMS-DX-303, a JEOL JMS-700, or a JMS-T100GC spectrometer. Silica gel 60 (40-50  $\mu\text{m}$ , Kanto Chemical CO., INC.) was employed for flash column chromatography.

## Experimental Procedures

### Synthesis of Symmetric Ethers

#### Typical experimental procedures: Synthesis of bis(2-naphthyl) ether 2a

In a two-necked flask equipped with a magnetic stirrer bar and a reflux condenser were placed 2-naphthol (1.00 mmol, 144.2 mg) and 4-chlorobenzenesulfonic acid (10 mol%, 19.3 mg) in *o*-dichlorobenzene (1.0 mL) under an argon atmosphere, and the solution was stirred and heated at reflux for 10 h. Solvent was removed in vacuo, and the residue was purified by flash column chromatography on silica gel (Hexane/Toluene 10:1) giving bis(2-naphthyl) ether (**2a**) (85%, 115.4 mg).

#### Bis(2-naphthyl) ether (**2a**)<sup>[1]</sup>

Colorless solid. Mp. 104.0-104.5 °C (Hexane), lit 104-105 °C.<sup>[1]</sup>  $R_f$  = 0.44 (Hexane/Toluene 6:1).  $^1\text{H-NMR}$  (400 MHz,  $\text{CDCl}_3$ )  $\delta$  7.30 (2H, d,  $J$  = 8.8 Hz), 7.36-7.42 (6H, m), 7.66 (2H, d,  $J$  = 8.0 Hz), 7.80 (2H, d,  $J$  = 6.4 Hz), 7.82 (2H, d,  $J$  = 8.4 Hz).  $^{13}\text{C-NMR}$  (100 MHz,  $\text{CDCl}_3$ )  $\delta$  114.4, 120.1, 124.8, 126.5, 127.1, 127.7, 129.9, 130.2, 134.3, 155.0. IR (KBr) 3051, 1595, 1269, 806, 742  $\text{cm}^{-1}$ . MS (EI)  $m/z$  270 ( $\text{M}^+$ , 100%). HRMS Calcd for ( $\text{C}_{20}\text{H}_{14}\text{O}$ ) $^+$ : 270.1045. Found: 270.1035.

#### Bis(6-bromonaphth-2-yl) ether (**2b**)

Colorless solid. Mp. 178.0-179.0 °C (Hexane).  $R_f$  = 0.64 (Hexane/Toluene 6:1).  $^1\text{H-NMR}$  (400 MHz,  $\text{CDCl}_3$ )  $\delta$  7.31 (2H, s), 7.32 (2H, dd,  $J$  = 6.4, 2.4 Hz), 7.52 (2H, dd,  $J$  = 8.8, 2.0 Hz), 7.56 (2H, d,  $J$  = 8.8 Hz), 7.77 (2H, d,  $J$  = 9.6 Hz), 7.99 (2H, s).  $^{13}\text{C-NMR}$  (100 MHz,  $\text{CDCl}_3$ )  $\delta$  114.4, 118.6, 121.0, 128.8, 129.2, 129.8, 130.0, 131.3, 132.7, 155.0. IR (KBr) 3063, 1582, 1250, 1209, 878, 808, 638  $\text{cm}^{-1}$ . MS (EI)  $m/z$  430 ( $\text{M}^+ + 4$ , 46%), 428 ( $\text{M}^+ + 2$ , 100%), 426 ( $\text{M}^+$ , 47%). HRMS Calcd for ( $\text{C}_{20}\text{H}_{12}\text{Br}_2\text{O}$ ) $^+$ : 425.9255. Found: 425.9250.

#### Bis(7-bromonaphth-2-yl) ether (**2c**)

Colorless solid. Mp. 191.0-192.0 °C (Hexane).  $R_f$  = 0.62 (Hexane/Toluene 6:1).  $^1\text{H-NMR}$  (400 MHz,  $\text{CDCl}_3$ )  $\delta$  7.26 (2H, d,  $J$  = 3.6 Hz), 7.31 (2H, dd,  $J$  = 8.8, 2.4 Hz), 7.50 (2H, dd,  $J$  = 8.8, 2.0 Hz), 7.71 (2H, d,  $J$  = 8.4 Hz), 7.83 (2H, d,  $J$  = 8.8 Hz), 7.87 (2H, d,  $J$  = 2.0 Hz).  $^{13}\text{C-NMR}$  (100 MHz,  $\text{CDCl}_3$ )  $\delta$  113.6, 120.4, 120.9, 128.3, 128.7, 129.2, 129.4, 130.1, 135.5, 155.5. IR (KBr) 3062, 1620, 1251, 833, 769  $\text{cm}^{-1}$ . MS (EI)  $m/z$  430 ( $\text{M}^+ + 4$ , 51%), 428 ( $\text{M}^+ + 2$ , 100%), 426 ( $\text{M}^+$ , 51%). HRMS Calcd for ( $\text{C}_{20}\text{H}_{12}\text{Br}_2\text{O}$ ) $^+$ : 425.9255. Found: 425.9230.

#### Bis(6-methylnaphth-2-yl) ether (**2d**)

Colorless solid. Mp. 145.0-146.0 °C (Hexane/AcOEt = 10).  $R_f$  = 0.53 (Hexane/Toluene 6:1).  $^1\text{H-NMR}$  (400 MHz,  $\text{CDCl}_3$ )  $\delta$  2.48 (6H, s), 7.26 (4H, dd,  $J$  = 8.8, 2.4 Hz), 7.31 (2H, d,  $J$  = 2.4 Hz), 7.57 (2H, d,  $J$  = 8.4 Hz), 7.58 (2H, s), 7.73 (2H, d,  $J$  = 9.2 Hz).  $^{13}\text{C-NMR}$  (100 MHz,  $\text{CDCl}_3$ )  $\delta$  21.5, 114.2, 120.1, 126.7, 127.0, 128.8, 129.2, 130.4, 132.4, 134.3, 154.5. IR (KBr) 3056, 2915, 1600, 1257, 1236, 811  $\text{cm}^{-1}$ . MS (EI)  $m/z$  298 ( $\text{M}^+$ , 100%). HRMS Calcd for ( $\text{C}_{22}\text{H}_{18}\text{O}$ ) $^+$ : 298.1358. Found: 298.1341.

#### Bis(6-chloronaphth-6-yl) ether (**2e**)

Colorless solid. Mp. 163.0-164.0 °C (Hexane/Toluene = 6).  $R_f$  = 0.59 (Hexane/Toluene 6:1).  $^1\text{H-NMR}$  (400 MHz,  $\text{CDCl}_3$ )  $\delta$  7.32-7.35 (4H, m), 7.41 (2H, dd,  $J$  = 8.8, 2.0 Hz), 7.64 (2H, d,  $J$  = 8.8 Hz), 7.78 (2H, d,  $J$  = 9.6 Hz), 7.83 (2H, d,  $J$  = 2.0 Hz).  $^{13}\text{C-NMR}$  (100 MHz,  $\text{CDCl}_3$ )  $\delta$  114.4, 121.1, 126.5, 127.5, 128.7, 129.2, 130.5, 130.8, 132.5, 155.0. IR (KBr) 3066, 1589, 1252, 1209, 879, 804  $\text{cm}^{-1}$ . MS (EI)  $m/z$  338 ( $\text{M}^+$ , 100%). HRMS Calcd for ( $\text{C}_{20}\text{H}_{12}\text{Cl}_2\text{O}$ ) $^+$ : 338.0265. Found: 338.0290.

#### Bi(1-naphthyl) ether (**2f**)<sup>[2]</sup>

Colorless solid. Mp. 109.0-110.0 °C (Hexane), lit 109.5 °C.<sup>[2]</sup>  $R_f$  = 0.66 (Hexane/Toluene 6:1).  $^1\text{H-NMR}$ <sup>[2]</sup> (400 MHz,  $\text{CDCl}_3$ )  $\delta$  6.90 (2H, d,  $J$  = 7.6 Hz), 7.36 (2H, t,  $J$  = 8.0 Hz), 7.50 (2H, td,  $J$  = 8.0, 1.2 Hz), 7.55 (2H, td,  $J$  = 8.0, 1.2 Hz), 7.64 (2H, d,  $J$  = 8.0 Hz), 7.91 (2H, d,  $J$  = 8.0 Hz), 8.31 (2H, d,  $J$  = 8.0 Hz).  $^{13}\text{C-NMR}$  (100 MHz,  $\text{CDCl}_3$ )  $\delta$  113.1, 122.0, 123.2, 125.9, 126.0, 126.5, 126.6, 127.8, 134.9, 153.4. IR (KBr) 3057, 1233, 1092, 772  $\text{cm}^{-1}$ . MS (EI)  $m/z$  270 ( $\text{M}^+$ , 100%). HRMS Calcd for ( $\text{C}_{20}\text{H}_{14}\text{O}$ ) $^+$ : 270.1045. Found: 270.1028.

#### Bis(6,7-dimethylnaphth-5-yl) ether (**2g**)

Colorless solid. Mp. 225.0-226.0 °C (Hexane).  $R_f$  = 0.68 (Hexane/Toluene 6:1).  $^1\text{H-NMR}$  (400 MHz,  $\text{CDCl}_3$ )  $\delta$  2.42 (6H, s), 2.45 (6H, s), 6.77 (2H, d,  $J$  = 7.2 Hz), 7.24 (2H, t,  $J$  = 8.0 Hz), 7.50 (2H, d,  $J$  = 8.4 Hz), 7.65 (2H, s), 8.06 (2H, s).  $^{13}\text{C-NMR}$  (100 MHz,  $\text{CDCl}_3$ )  $\delta$  20.2, 20.4, 112.2, 121.4, 122.1, 125.0, 125.4, 127.4, 133.9, 135.8, 136.4, 153.0. IR (KBr) 3060, 2939, 2916, 1565, 1230, 1140, 792, 744  $\text{cm}^{-1}$ . MS (EI)  $m/z$  326 ( $\text{M}^+$ , 100%). HRMS Calcd for ( $\text{C}_{24}\text{H}_{22}\text{O}$ ) $^+$ : 326.1671. Found: 326.1676.

#### Bis(4,6,7-trimethylnaphth-1-yl) ether (**2h**)

Colorless solid. Mp 182.0-183.0 °C (Hexane).  $R_f$  = 0.62 (Hexane/Toluene 6:1).  $^1\text{H-NMR}$  (400 MHz,  $\text{CDCl}_3$ )  $\delta$  2.41 (6H, s), 2.48 (6H, s), 2.62 (6H, s), 6.65 (2H, d,  $J$  = 7.6 Hz), 7.06 (2H, d,  $J$  = 7.6 Hz), 7.75 (2H, s), 8.09 (2H, s).  $^{13}\text{C-NMR}$  (100 MHz,  $\text{CDCl}_3$ )  $\delta$  19.0, 20.3, 20.6,

111.7, 122.0, 124.1, 125.4, 125.4, 128.2, 132.6, 135.3, 136.0, 151.8. IR (KBr) 3024, 2963, 2938, 2913, 2853, 1430, 1247, 1208, 862 cm<sup>-1</sup>. MS (EI) *m/z* 354 (M<sup>+</sup>, 100%). HRMS Calcd for (C<sub>26</sub>H<sub>26</sub>O)<sup>+</sup>: 354.1984. Found: 354.1986.

#### Bis(4-methylnaphth-1-yl) ether (2i)

Colorless solid. Mp. 128.0-129.0 °C (Hexane). R<sub>f</sub> = 0.83 (Hexane/Toluene 6:1). <sup>1</sup>H-NMR (400 MHz, CDCl<sub>3</sub>) δ 2.66 (6H, d, *J* = 0.8 Hz), 6.78 (2H, d, *J* = 7.6 Hz), 7.17 (2H, dd, *J* = 8.0, 0.8 Hz), 7.50 (2H, ddd, *J* = 8.0, 6.8, 1.2 Hz), 7.59 (2H, ddd, *J* = 8.4, 6.8, 1.6 Hz), 8.02 (2H, d, *J* = 8.4 Hz), 8.34 (2H, d, *J* = 8.0 Hz). <sup>13</sup>C-NMR (100 MHz, CDCl<sub>3</sub>) δ 19.0, 112.6, 122.6, 124.3, 125.6, 126.2, 126.4, 126.6, 129.3, 133.7, 152.1. IR (KBr) 3064, 2936, 1577, 1236, 758 cm<sup>-1</sup>. MS (EI) *m/z* 298 (M<sup>+</sup>, 100%), 283 (M<sup>+</sup>-CH<sub>3</sub>, 24%), 268 (M<sup>+</sup>-C<sub>2</sub>H<sub>6</sub>, 12%), 141 (M<sup>+</sup>-C<sub>13</sub>H<sub>9</sub>O, 13%). HRMS Calcd for (C<sub>22</sub>H<sub>18</sub>O)<sup>+</sup>: 298.1358. Found: 298.1357.

#### Bis(6,7-dibromonaphth-5-yl) ether (2j)

Colorless solid. Mp. 238.5-239.5 °C (Hexane/Toluene = 2). R<sub>f</sub> = 0.59 (Hexane/Toluene 6:1). <sup>1</sup>H-NMR (400 MHz, CDCl<sub>3</sub>) δ 6.88 (2H, dd, *J* = 7.6, 1.2 Hz), 7.40 (2H, d, *J* = 8.0 Hz), 7.54 (2H, d, *J* = 8.4 Hz), 8.22 (2H, s), 8.56 (2H, s). <sup>13</sup>C-NMR (100 MHz, CDCl<sub>3</sub>) δ 114.0, 122.5, 122.7, 123.4, 126.2, 126.7, 127.4, 132.3, 134.5, 152.2. IR (KBr) 3056, 1562, 1254, 1101, 785, 736 cm<sup>-1</sup>. MS (EI) *m/z* 590 (M<sup>+</sup>+8, 17%), 588 (M<sup>+</sup>+6, 59%), 586 (M<sup>+</sup>+4, 100%), 584 (M<sup>+</sup>+2, 69%), 582 (M<sup>+</sup>, 15%). HRMS Calcd for (C<sub>20</sub>H<sub>10</sub>Br<sub>4</sub>O)<sup>+</sup>: 581.7465. Found: 581.7464.

#### Bis(9-phenanthryl) ether (2k)<sup>[3]</sup>

Colorless solid. Mp. 212.5-213.0 °C (Hexane), lit 202.5-203.0 °C<sup>[3]</sup>. R<sub>f</sub> = 0.47 (Hexane/Toluene = 6). <sup>1</sup>H-NMR (400 MHz, CDCl<sub>3</sub>) δ 7.21 (2H, s), 7.51 (2H, ddd, *J* = 8.0, 8.0, 1.2 Hz), 7.58 (2H, ddd, *J* = 8.4, 6.8, 1.6 Hz), 7.63 (4H, td, *J* = 6.8, 1.2 Hz), 7.74 (2H, ddd, *J* = 8.4, 7.2, 1.6 Hz), 8.43 (2H, dd, *J* = 8.4, 1.2 Hz), 8.68 (2H, d, *J* = 8.4 Hz), 8.76 (2H, d, *J* = 8.4 Hz). <sup>13</sup>C-NMR (100 MHz, CDCl<sub>3</sub>) δ 112.1, 122.6, 122.7, 122.9, 125.5, 126.7, 126.9, 127.0, 127.5, 127.8, 127.9, 131.9, 132.2, 151.4. IR (KBr) 3054, 1625, 1227, 766, 727 cm<sup>-1</sup>. MS (EI) *m/z* 370 (M<sup>+</sup>, 100%). HRMS Calcd for (C<sub>28</sub>H<sub>18</sub>O)<sup>+</sup>: 379.1358. Found: 370.1339.

#### Bis(2-phenanthryl) ether (2l)

Colorless solid. Mp. 198.5-199.5 °C (Hexane/Toluene 10:1). R<sub>f</sub> = 0.32 (Hexane/Toluene = 6). <sup>1</sup>H-NMR (400 MHz, CDCl<sub>3</sub>) δ 7.45 (2H, d, *J* = 9.2 Hz), 7.48 (2H, s), 7.54–7.65 (6H, m), 7.71 (2H, d, *J* = 9.2 Hz), 7.86 (2H, d, *J* = 8.0 Hz), 8.60 (2H, d, *J* = 8.0 Hz), 8.66 (2H, d, *J* = 8.8 Hz). <sup>13</sup>C-NMR (100 MHz, CDCl<sub>3</sub>) δ 116.1, 119.3, 122.4, 124.7, 126.2, 126.3, 126.5, 126.8, 127.8, 128.6, 130.2, 131.4, 133.4, 155.8. IR (KBr) 3047, 1613, 1266, 744 cm<sup>-1</sup>. MS (EI) *m/z* 370 (M<sup>+</sup>, 100%). HRMS Calcd for (C<sub>28</sub>H<sub>18</sub>O)<sup>+</sup>: 370.1358. Found: 370.1378.

#### Bis(4-pyrenyl) ether (2m)

Colorless solid. Mp. 234.0-235.0 °C (Hexane/Toluene 3:1). R<sub>f</sub> = 0.52 (Hexane/Toluene = 6). <sup>1</sup>H-NMR (400 MHz, CDCl<sub>3</sub>) δ 7.65 (2H, s), 7.94 (2H, dd, *J* = 12.4, 8.0 Hz), 7.96 (2H, s), 8.05 (2H, t, *J* = 8.0 Hz), 8.14-8.17 (6H, m), 8.30 (2H, dd, *J* = 8.0, 1.2 Hz), 8.74 (2H, dd, *J* = 8.0, 1.2 Hz). <sup>13</sup>C-NMR (100 MHz, CDCl<sub>3</sub>) δ 112.6, 119.9, 122.3, 124.2, 124.6, 125.9, 126.0, 126.0, 126.1, 126.3, 127.4, 127.6, 131.1, 131.4, 131.4, 152.5. IR (KBr) 3041, 1593, 1269, 717 cm<sup>-1</sup>. MS (EI) *m/z* 418 (M<sup>+</sup>, 100%). HRMS Calcd for (C<sub>32</sub>H<sub>18</sub>O)<sup>+</sup>: 418.1358. Found: 418.1329.

### Synthesis of Unsymmetric Ethers

#### Typical experimental procedures: Synthesis of 9-(3-fluorophenoxy)phenanthrene

In a two-necked flask equipped with a magnetic stirrer bar were placed 9-phenanthrol (0.5 mmol, 97.1 mg), 3-fluorophenol (0.5 mmol, 56.1 mg), and 4-chlorobenzenesulfonic acid (0.1 mmol, 19.3 mg) in *o*-dichlorobenzene (1.0 mL) under an argon atmosphere, and the solution was stirred and heated at reflux for 10 h. Solvent was removed in vacuo, and the residue was purified by flush column chromatography on silica gel (Hexane/Toluene 10:1) giving 9-(3-fluorophenoxy)phenanthrene (**4a**) (68%, 97.9 mg).

#### 9-(3-Fluorophenoxy)phenanthrene (4a)

Colorless solid. Mp. 82.5-83.0 °C (Hexane). R<sub>f</sub> = 0.30 (Hexane/Toluene 6:1). <sup>1</sup>H-NMR (400 MHz, CDCl<sub>3</sub>) δ 6.79-6.83 (2H, m), 6.86 (1H, d, *J* = 8.8 Hz), 7.20 (1H, s), 7.26 (1H, td, *J* = 8.4, 6.8 Hz), 7.50-7.61 (3H, m), 7.65-7.71 (2H, m), 8.22 (1H, dd, *J* = 8.4, 0.8 Hz), 8.61 (1H, d, *J* = 8.4 Hz), 8.68 (1H, d, *J* = 8.4 Hz). <sup>13</sup>C-NMR (100 MHz, CDCl<sub>3</sub>) δ 106.1 (d, *J* = 24.5 Hz), 110.1 (d, *J* = 21.6 Hz), 113.1, 114.0 (d, *J* = 3.0 Hz), 122.6, 122.6, 122.9, 125.8, 126.7, 126.8, 127.0, 127.4, 127.9, 128.0, 130.6 (d, *J* = 9.7 Hz), 131.8, 132.0, 150.6, 159.0 (d, *J* = 10.4 Hz), 163.6 (d, *J* = 245.8 Hz). <sup>19</sup>F-NMR (376 MHz, CDCl<sub>3</sub>) δ -114.2. IR (KBr) 3065, 1609, 1485, 1271, 1125, 738, 726 cm<sup>-1</sup>. MS (EI) *m/z* 288 (M<sup>+</sup>, 100%). HRMS Calcd for (C<sub>20</sub>H<sub>13</sub>FO)<sup>+</sup>: 288.0950. Found: 288.0935.

#### 9-(4-Chlorophenoxy)phenanthrene (4b)

Colorless solid. Mp. 104.0-105.0 °C (Hexane). R<sub>f</sub> = 0.59 (Hexane/Toluene 6:1). <sup>1</sup>H-NMR (400 MHz, CDCl<sub>3</sub>) δ 6.99 (2H, d, *J* = 8.8 Hz), 7.06 (1H, s), 7.26 (2H, d, *J* = 9.2 Hz), 7.48 (1H, dd, *J* = 7.2, 1.2 Hz), 7.52 (1H, dd, *J* = 7.2, 1.6 Hz), 7.57 (1H, ddd, *J* = 9.2, 8.0, 1.2 Hz), 7.64 (2H, ddd, *J* = 9.6, 8.4, 1.6 Hz), 8.25 (1H, dd, *J* = 8.0, 1.2 Hz), 8.56 (1H, d, *J* = 8.0 Hz), 8.63 (1H, d, *J* = 8.4 Hz). <sup>13</sup>C-NMR (100 MHz, CDCl<sub>3</sub>) δ 111.8, 120.2, 122.5, 122.6, 122.8, 125.6, 126.6, 126.8, 127.0, 127.4, 127.75, 127.80, 128.4, 129.8, 131.7, 132.0, 151.2, 155.9. IR (KBr) 3054, 1589, 1238, 1063, 823, 726 cm<sup>-1</sup>. MS (EI) *m/z* 304 (M<sup>+</sup>, 100%). HRMS Calcd for (C<sub>20</sub>H<sub>13</sub>ClO)<sup>+</sup>: 304.0655. Found: 304.0647.

#### 9-(4-Methoxyphenoxy)phenanthrene (4c)

Colorless solid. Mp. 123.5-124.5 °C (Hexane/Toluene 10:1). R<sub>f</sub> = 0.26 (Hexane/Toluene 6:1). <sup>1</sup>H-NMR (400 MHz, CDCl<sub>3</sub>) δ 3.84 (3H, s), 6.92 (1H, s), 6.95 (2H, d, *J* = 9.2 Hz), 7.12 (2H, d, *J* = 9.2 Hz), 7.50 (1H, td, *J* = 7.2, 1.6 Hz), 7.54 (1H, td, *J* = 7.2, 1.6 Hz), 7.63–7.68 (2H, m), 7.73 (1H, ddd, *J* = 8.4, 7.2, 1.6 Hz), 8.44 (1H, dd, *J* = 8.0, 1.2 Hz), 8.62 (1H, d, *J* = 8.0 Hz), 8.71 (1H, d, *J* = 8.0 Hz). <sup>13</sup>C-NMR (100 MHz, CDCl<sub>3</sub>) δ 55.7, 108.9, 115.0, 121.2, 122.5, 122.6, 122.7, 125.0, 126.6, 126.7, 126.9, 127.2, 127.3, 127.6, 131.6, 132.4, 149.9, 153.1, 156.1. IR (KBr) 3075, 2832, 1504, 1207, 834, 726 cm<sup>-1</sup>. MS (EI) *m/z* 300 (M<sup>+</sup>, 100%). HRMS Calcd for (C<sub>21</sub>H<sub>16</sub>O<sub>2</sub>)<sup>+</sup>: 300.1150. Found: 300.1143.

#### 9-((6-Chloronaphthalen-2-yl)oxy)phenanthrene (4d)

Colorless solid. Mp. 122.5-123.5 °C (Hexane). R<sub>f</sub> = 0.53 (Hexane/Toluene 6:1). <sup>1</sup>H-NMR (400 MHz, CDCl<sub>3</sub>) δ 7.20 (1H, s), 7.35 (1H, d, *J* = 2.4 Hz), 7.38 (1H, dd, *J* = 8.8, 2.4 Hz), 7.43 (1H, dd, *J* = 8.8, 2.4 Hz), 7.53-7.65 (4H, m), 7.70 (1H, dd, *J* = 7.2, 1.6 Hz), 7.73 (1H, ddd, *J* = 8.4, 6.8, 1.2 Hz), 7.80 (1H, d, *J* = 9.2 Hz), 7.83 (1H, d, *J* = 2.0 Hz), 8.32 (1H, dd, *J* = 8.4, 1.2 Hz), 8.68 (1H, d, *J* = 8.4 Hz), 8.75 (1H, d, *J*

= 8.4 Hz). <sup>13</sup>C-NMR (100 MHz, CDCl<sub>3</sub>) δ 112.6, 114.0, 120.9, 122.6, 122.7, 122.9, 125.7, 126.5, 126.8, 126.9, 127.1, 127.4, 127.5, 127.9, 127.9, 128.7, 129.2, 130.4, 130.7, 131.8, 132.1, 132.6, 151.2, 155.6. IR (KBr) 3071, 1591, 1246, 1195, 1147, 726 cm<sup>-1</sup>. MS (EI) *m/z* 354 (M<sup>+</sup>, 100%). HRMS Calcd for (C<sub>24</sub>H<sub>15</sub>ClO)<sup>+</sup>: 354.0811. Found: 354.0806.

#### 9-((4-Chloronaphthalen-1-yl)oxy)phenanthrene (4e)

Colorless solid. Mp. 133.0-134.0 °C (Hexane). R<sub>f</sub> = 0.60 (Hexane/Toluene 6:1). <sup>1</sup>H-NMR (400 MHz, CDCl<sub>3</sub>) δ 6.96 (1H, d, *J* = 8.4 Hz), 7.07 (1H, s), 7.48 (1H, d, *J* = 8.0 Hz), 7.51-7.71 (6H, m), 7.76 (1H, ddd, *J* = 8.4, 7.2, 1.6 Hz), 8.33 (1H, d, *J* = 8.4 Hz), 8.34 (1H, d, *J* = 8.8 Hz), 8.40 (1H, dd, *J* = 8.0, 1.2 Hz), 8.67 (1H, d, *J* = 8.0 Hz), 8.76 (1H, d, *J* = 8.0 Hz). <sup>13</sup>C-NMR (100 MHz, CDCl<sub>3</sub>) δ 111.4, 113.8, 122.5, 122.5, 122.6, 122.9, 124.7, 125.6, 125.9, 126.4, 126.7, 126.9, 126.9, 127.0, 127.5, 127.6, 127.8, 127.8, 127.9, 131.8, 131.9, 132.1, 151.7, 152.0. IR (KBr) 3060, 1589, 1228, 1079, 736 cm<sup>-1</sup>. MS (EI) *m/z* 354 (M<sup>+</sup>, 100%). HRMS Calcd for (C<sub>24</sub>H<sub>15</sub>ClO)<sup>+</sup>: 354.0811. Found: 354.0844.

#### 9-((6,7-Dibromonaphthalen-1-yl)oxy)phenanthrene (4f)

Colorless solid. Mp. 192.0-193.0 °C (Hexane/Toluene 2:1). R<sub>f</sub> = 0.56 (Hexane/Toluene 6:1). <sup>1</sup>H-NMR (400 MHz, CDCl<sub>3</sub>) δ 6.93 (1H, dd, *J* = 7.6, 0.8 Hz), 7.17 (1H, s), 7.37 (1H, t, *J* = 8.0 Hz), 7.50 (1H, d, *J* = 8.4 Hz), 7.55 (1H, ddd, *J* = 8.4, 7.2, 1.2 Hz), 7.59 - 7.65 (2H, m), 7.69 (1H, dd, *J* = 8.0, 1.2 Hz), 7.75 (1H, ddd, *J* = 8.4, 7.2, 1.6 Hz), 8.22 (1H, s), 8.29 (1H, dd, *J* = 8.4, 0.8 Hz), 8.68 (1H, dd, *J* = 8.4, 0.4 Hz), 8.69 (1H, s), 8.76 (1H, d, *J* = 8.0 Hz). <sup>13</sup>C-NMR (100 MHz, CDCl<sub>3</sub>) δ 112.7, 113.6, 121.9, 122.5, 122.5, 122.7, 123.0, 123.3, 125.8, 126.1, 126.5, 126.9, 127.0, 127.1, 127.5, 127.6, 128.0, 128.1, 131.9, 132.0, 132.2, 134.5, 150.9, 152.7. IR (KBr) 3072, 1565, 1230, 1090, 738 cm<sup>-1</sup>. MS (EI) *m/z* 480 (M<sup>+</sup>+4, 50%), 478 (M<sup>+</sup>+2, 100%), 476 (M<sup>+</sup>, 50%). HRMS Calcd for (C<sub>24</sub>H<sub>14</sub>Br<sub>2</sub>O)<sup>+</sup>: 475.9411. Found: 475.9405.

#### 2-(Phenanthren-9-yloxy)phenanthrene (4g)

Colorless solid. Mp. 151.0-152.0 °C (Hexane/Toluene 2:1). R<sub>f</sub> = 0.44 (Hexane/Toluene 6:1). <sup>1</sup>H-NMR (400 MHz, CDCl<sub>3</sub>) δ 7.22 (1H, s), 7.51-7.76 (11H, m), 7.88 (1H, dd, *J* = 8.0, 1.2 Hz), 8.40 (1H, dd, *J* = 8.0, 1.2 Hz), 8.64 (1H, d, *J* = 8.4 Hz), 8.68 (1H, d, *J* = 8.0 Hz), 8.71 (1H, d, *J* = 9.2 Hz), 8.76 (1H, d, *J* = 8.4 Hz). <sup>13</sup>C-NMR (100 MHz, CDCl<sub>3</sub>) δ 112.1, 116.1, 119.3, 122.4, 122.6, 122.8, 122.8, 124.8, 125.5, 126.2, 126.4, 126.5, 126.8 (overlapped 2 peaks), 126.9, 127.0, 127.4, 127.8, 127.8, 127.9, 128.6, 130.2, 131.4, 131.8, 132.2, 133.5, 151.6, 156.0. IR (KBr) 3057, 1611, 1599, 1252, 750, 726 cm<sup>-1</sup>. MS (EI) *m/z* 370 (M<sup>+</sup>, 100%). HRMS Calcd for (C<sub>28</sub>H<sub>18</sub>O)<sup>+</sup>: 370.1358. Found: 370.1380.

#### 2-(Phenanthren-9-yloxy)triphenylene (4h)

Colorless solid. Mp. 195.0-196.0 °C (Toluene/Hexane 5:1). R<sub>f</sub> = 0.30 (Hexane/Toluene 6:1). <sup>1</sup>H-NMR (400 MHz, CDCl<sub>3</sub>) δ 7.22 (1H, s), 7.47 (1H, dd, *J* = 9.2, 2.4 Hz), 7.53 (1H, ddd, *J* = 8.0, 7.2, 1.2 Hz), 7.58 (1H, dd, *J* = 7.2, 1.2 Hz), 7.62 (1H, dd, *J* = 7.2, 1.6 Hz), 7.64-7.70 (5H, m), 7.77 (1H, ddd, *J* = 8.4, 6.8, 1.2 Hz), 8.39 (1H, d, *J* = 2.4 Hz), 8.46 (2H, t, *J* = 8.0 Hz), 8.61 (1H, d, *J* = 9.6 Hz), 8.65-8.71 (4H, m), 8.77 (1H, d, *J* = 8.0 Hz). <sup>13</sup>C-NMR (100 MHz, CDCl<sub>3</sub>) δ 111.5, 112.8, 119.4, 122.6, 122.8, 122.8, 123.1, 123.3, 123.4, 123.5, 125.4, 125.5, 126.0, 126.9 (overlapped 3 peaks), 127.0, 127.2, 127.4, 127.5, 127.6, 127.7, 127.9, 129.2, 129.2, 129.6, 130.1, 131.7, 131.8, 132.2, 151.9, 156.5. IR (KBr) 3073, 1612, 1225, 1199, 754, 729 cm<sup>-1</sup>. MS (EI) *m/z* 420 (M<sup>+</sup>, 100%). HRMS Calcd for (C<sub>32</sub>H<sub>20</sub>O)<sup>+</sup>: 420.1514. Found: 420.1521.

#### 1-(Phenanthren-9-yloxy)pyrene (4i)

Yellow solid. Mp. 197.0-198.0 °C (Toluene/Hexane 2:1). R<sub>f</sub> = 0.45 (Hexane/Toluene 6:1). <sup>1</sup>H-NMR (400 MHz, CDCl<sub>3</sub>) δ 6.89 (1H, s), 7.44-7.57 (3H, m), 7.73 (1H, ddd, *J* = 8.4, 7.2, 1.2 Hz), 7.75 (1H, d, *J* = 8.4 Hz), 7.80 (1H, ddd, *J* = 8.4, 7.2, 1.6 Hz), 8.03 (1H, t, *J* = 7.6 Hz), 8.05 (1H, d, *J* = 9.6 Hz), 8.08 (2H, d, *J* = 2.4 Hz), 8.17 (2H, d, *J* = 8.8 Hz), 8.21 (1H, d, *J* = 7.6 Hz), 8.40 (1H, d, *J* = 9.2 Hz), 8.67 (2H, d, *J* = 8.0 Hz), 8.78 (1H, d, *J* = 8.4 Hz). <sup>13</sup>C-NMR (100 MHz, CDCl<sub>3</sub>) δ 109.8, 117.8, 121.1, 122.6, 122.7, 122.8, 123.0, 124.8, 125.0, 125.1, 125.2, 125.6, 126.1, 126.4, 126.5, 126.9, 126.9, 127.2, 127.4, 127.5, 127.7 (overlapped 2 peaks), 127.7, 128.1, 131.3, 131.4, 131.8, 132.3, 150.0, 153.2. IR (KBr) 3045, 1596, 1248, 831 cm<sup>-1</sup>. MS (EI) *m/z* 394 (M<sup>+</sup>, 100%). HRMS Calcd for (C<sub>30</sub>H<sub>18</sub>O)<sup>+</sup>: 398.1358. Found: 394.1357.

**Synthesis <sup>18</sup>O-labeled phenol<sup>[4]</sup>:** Aniline (0.91 mL, 10 mmol) was dissolved in water (3.5 mL) and 50% tetrafluoroboric acid (3.5 mL) was added. The solution was cooled to 0 °C, and a solution of sodium nitrite (700 mg, 10.1 mmol) in water (1.5 mL) was added dropwise. The suspension was stirred keeping 0 °C for 30 min, and the mixture was filtered, solid materials was purified by re-precipitation from acetone/diethyl ether (5:1) solution. Benzenediazonium tetrafluoroborate was obtained in 78% yield (1.5g, 7.81 mmol) dried under vacuum. Concentrated sulfuric acid (62.5 μL) was added to a stirred paste of benzenediazonium tetrafluoroborate (0.5g, 2.6 mmol) in 98% [<sup>18</sup>O]water (0.5 mL, TAIYO NIPPON SANSO Coporation). The mixture was then heated to 65 °C until evolution of nitrogen ceased. The solution was extracted with diethyl ether several times. The ethereal layer was washed with 1 M HCl and saturated brine, dried over magnesium sulfate, and concentrated under reduced pressure. The crystalline residue was purified by sublimation to give the <sup>18</sup>O-labelled phenol as colourless solid (158.8 mg, 64%). The <sup>18</sup>O-enrichment of phenol was found by ESI-MS to be 85%.

**The reaction of 9-phenanthrol (1k) and <sup>18</sup>O-labeled phenol:** In a two-necked flask equipped with a magnetic stirrer bar were placed 9-phenanthrol (0.125 mmol, 24.3 mg), <sup>18</sup>O-phenol (0.125 mmol, 12.0 mg), and 4-chlorobenzenesulfonic acid (0.025 mmol, 4.8 mg) in *o*-dichlorobenzene (0.25 mL) under an argon atmosphere, and the solution was stirred and heated at reflux for 10 h. Solvent was removed in vacuo, and the residue was purified by flush column chromatography on silica gel (Hexane/Toluene 50:1) giving 9-phenoxyphenanthrene (4j) (63%, 21.4 mg) and 2k (28%, 6.4 mg). The <sup>18</sup>O-enrichment of 4j was found by ESI-MS to be at least 83%. 2k was not labelled with <sup>18</sup>O.

#### 9-phenoxyphenanthrene (4j)

Colorless solid. Mp. 77.5-78.5 °C (Hexane). R<sub>f</sub> = 0.2 (Hexane/Toluene 10:1). <sup>1</sup>H-NMR (400 MHz, CDCl<sub>3</sub>) δ 7.10-7.20 (4H, m), 7.37 (2H, t, *J* = 8.0 Hz), 7.49-7.57 (2H, m), 7.57-7.72 (3H, m), 8.34 (1H, d, *J* = 8.4 Hz), 8.62 (1H, d, *J* = 8.0 Hz), 8.69 (1H, d, *J* = 8.0 Hz). <sup>13</sup>C-NMR (100 MHz, CDCl<sub>3</sub>) δ 111.4, 119.1, 122.6, 122.7, 123.5, 125.4, 126.7, 126.9 (overlapped 2 peaks), 127.3, 127.7, 127.8, 129.9, 131.7, 132.2, 151.7, 157.3. IR (KBr) 3061, 1488, 1229, 1066 cm<sup>-1</sup>. MS (EI) *m/z* 270 (M<sup>+</sup>, 100%). HRMS Calcd for (C<sub>20</sub>H<sub>14</sub>O)<sup>+</sup>: 270.1045. Found: 270.1037. One carbon peaks were piled up in <sup>13</sup>C-NMR. The data consistent with that reported in the literature.<sup>[5]</sup>

## References

- [1] B. J. Morrison, O. C. Musgrave, *Phosphorus, Sulfur and Silicon*, **2002**, 177, 2725-2744.
- [2] F. Ullmann, P. Sponagel, *Justus Liebigs Ann. Chem.* **1907**, 350, 83-107.
- [3] R. C. Fuson, R. L. Talbott. *J. Org. Chem.*, **1961**, 26, 2674-2676.
- [4] A. N. Holding and J. B. Spencer, *ChemBioChem*, **2008**, 9, 2209-2214.
- [5] Y. Chen, N. Zhang, L. Ye, J. Chen, X. Sun, X. Zhang, and M. Yan, *RSC Adv.*, **2015**, 5, 48046-48049.

## 2,2'-Oxybisanthalene (2a) <sup>1</sup>H-NMR

```

date Jun 17 2019 temp not used
solvent cdc13 gain not used
file /media/disk7/8- spin 16
ns/2,2'-Oxybisanth- hsc 0.008
halena_1H.fid pw90 14.600
ACQUISITION alfa 10.000
sw 6410.3 il FLAGS n
at 3.900 i1 n
sp 64872 in n
zb 4000 dp y
bs 4 hs nm
dl 1.500 PROCESSING 0.20
nt 16 lb not used
st 12 fu not used
TRANSMITTER DISPLAY
en H1 sp 2894.8
freq 399.283 wp 4299.5
tof 399.3 xfl 853.7
pw 30 xfp 0
pwr 7.300 xp -104.3
RECOUPLER lp 8
dn C13 PLOT
dof 0 wc 300
dm nm sc 10
dm o vs 617
dpr 42 th
dnc 29412 ai cdc ph
  
```

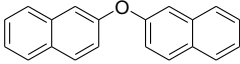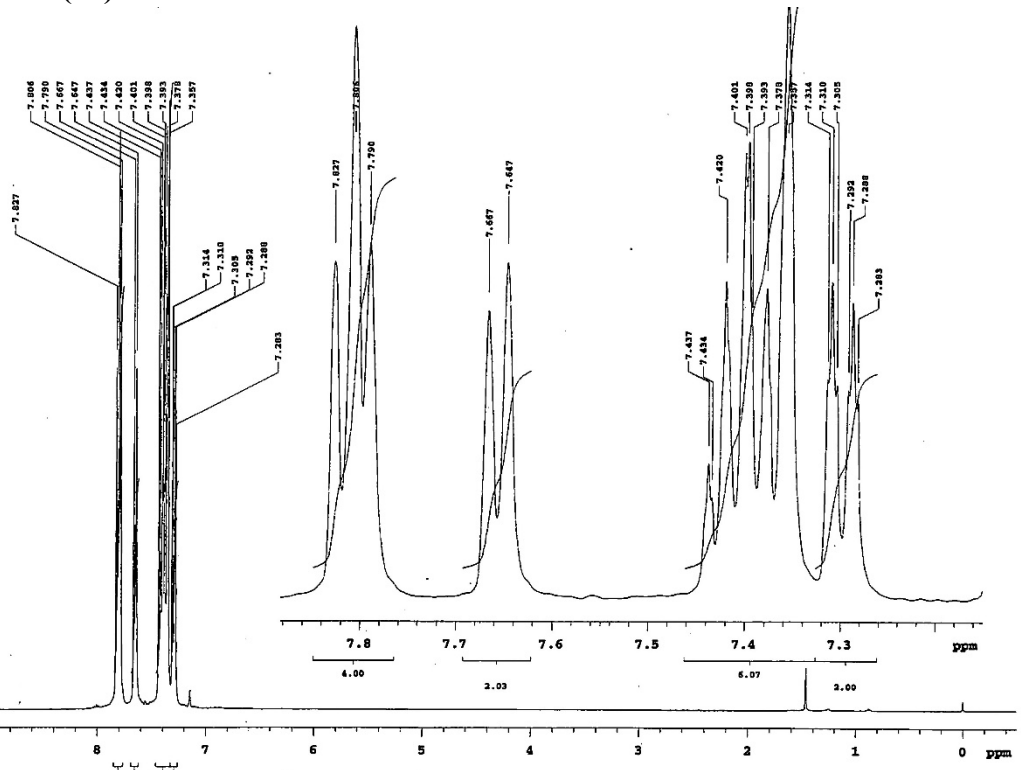

## 2,2'-Oxybisanthalene (2a) <sup>13</sup>C-NMR

```

SAMPLE SPECIAL
ata Jun 17 2019 temp not used
solvent cdc13 gain not used
file /media/disk7/8- spin 16
ns/2,2'-Oxybisanth- hsc 0.008
halena_13C.fid pw90 13.100
ACQUISITION alfa 10.000
sw 34599.8 il FLAGS n
t 1.300 i1 n
p 63750 in n
b 17000 dp y
s 26 hs nm
l 0.700 PROCESSING 1.00
t 10240 lb not used
c 1296 En not used
TRANSMITTER DISPLAY
en H1 sp 7485.9
freq 100.410 wp 9101.4
of 1026.9 xfl 9499.0
pwr 60 xfp 7730.7
pwr 6.590 xp 49.4
RECOUPLER lp 0
dn C13 PLOT
dof 300.0 wc 370
dm nm sc 0
dm o vs 1248
dpr 42 th 15
dnc 9992 ai cdc ph
  
```

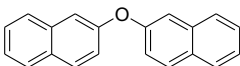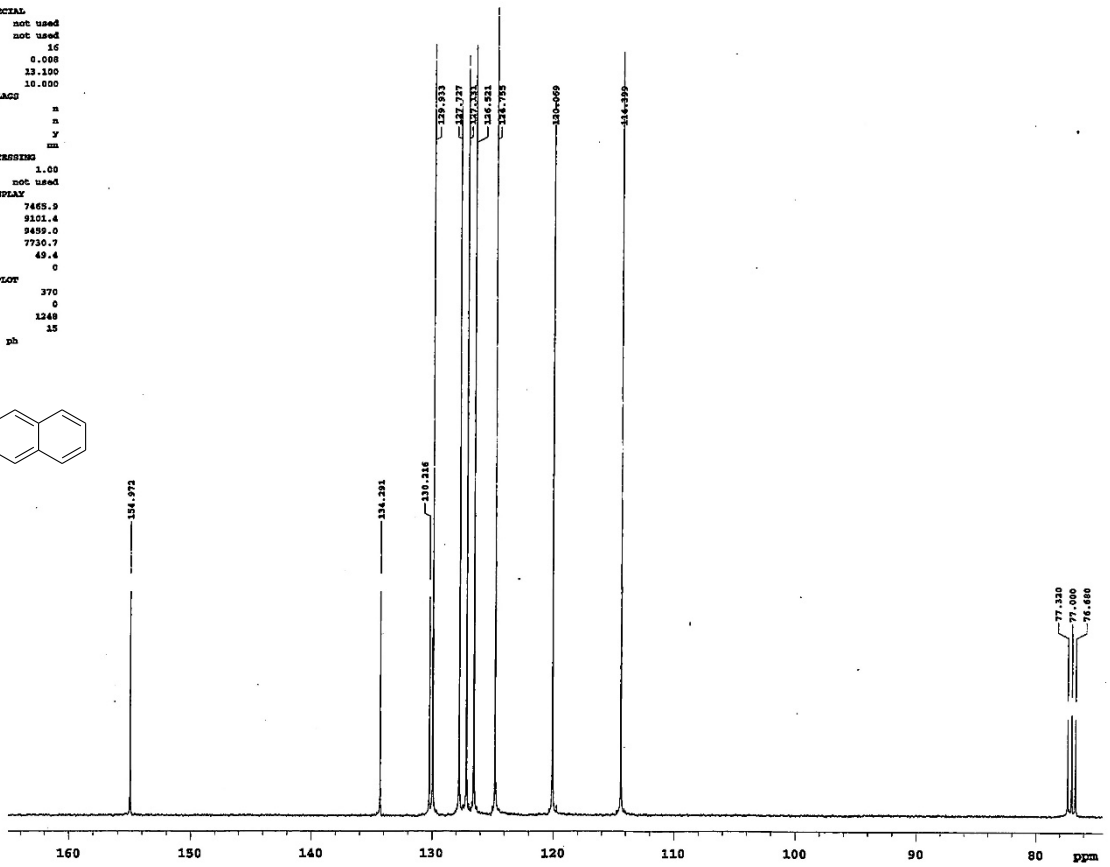

# 6,6'-Oxybis(2-bromonaphthalene) (2b) <sup>1</sup>H-NMR

```

SAMPLE          SPECIAL
date Feb 13 2019 temp not used
solvent cdcl3 gain not used
file /media/disk/8- spin 16
I-NMRData_Rhbertzi-hat 0.008
cation/5,6-Oxybis(1-pw90 14.600
I-bromonaphthalene-alfa 10.000
) _1h.fid      FLAGS
ACQUISITION    il n
sw 6410.3 in n
at 3.500 dp y
up 44872 hs m
sp 4000 PROCESSING
w 4 lb not used
il 1.500 fu not used
it 16 DISPLAY
TRANSMITTER    wp 2899.8
m H1 rfi 4898.5
ifrq 399.139 rfp 897.0
cof 399.3 xp -128.6
pwr 58 lp 0
sw 7.300 FLOW
DECOUPLER      wc 180
in C13 oc 80
lof 0 vs 262
tm nm ch 16
lpr 41 c ai cdc ph
inf 29412
    
```

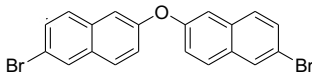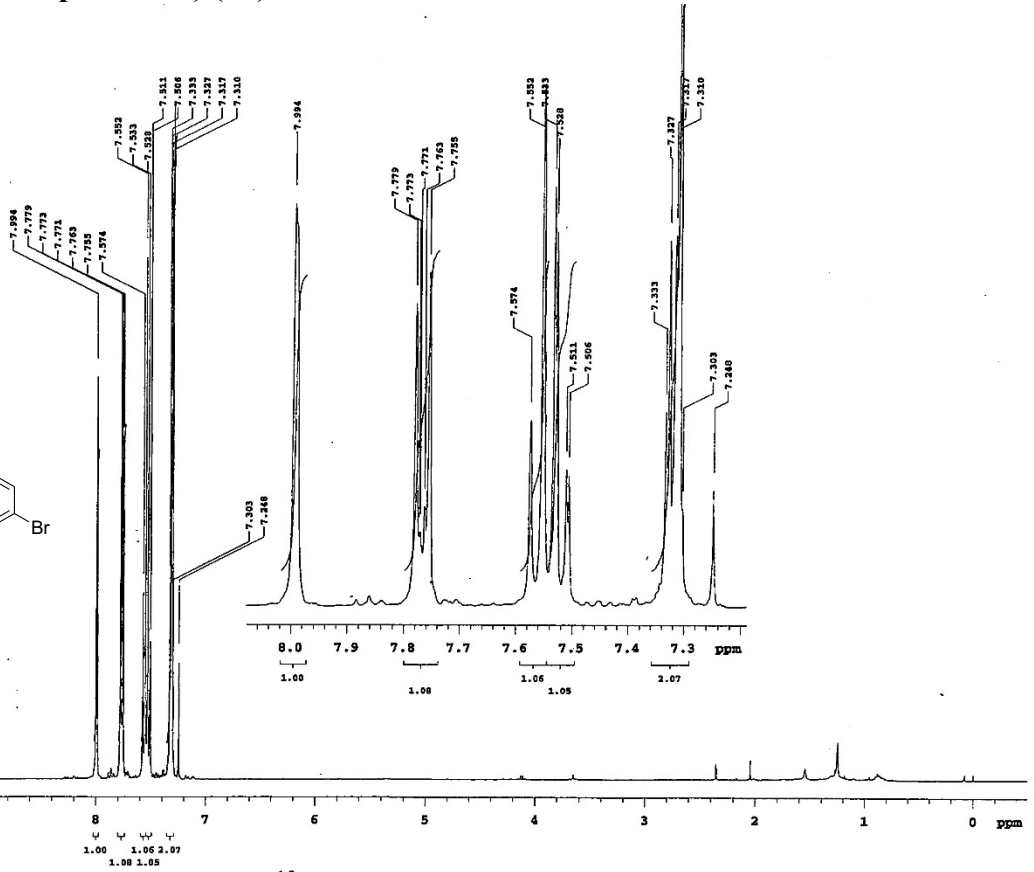

# 6,6'-Oxybis(2-bromonaphthalene) (2b) <sup>13</sup>C-NMR

```

exp4 Carbon
SAMPLE          SPECIAL
date Feb 13 2019 temp not used
solvent cdcl3 gain not used
file /media/disk/8- spin 16
I-NMRData_Rhbertzi-hat 0.008
cation/5,6-Oxybis(1-pw90 13.100
I-bromonaphthalene-alfa 10.000
) _13c.fid      FLAGS
ACQUISITION    il n
sw 24909.8 in n
at 1.300 dp y
sp 63750 hs m
sb 17000 PROCESSING
w 16 lb 1.00
dl 0.700 fu not used
nt 20000 DISPLAY
ct 544 sp 7302.9
TRANSMITTER    wp 5088.0
m H1 rfi 9444.7
sfrq 100.414 rfp 7731.0
cof 1026.8 xp 71.0
tpr 60 lp 0
sw 6.550 FLOW
DECOUPLER      wc 370
dn H1 sc 0
dof 300.0 vs 7472
dm 100 ch 23
lpr 42 w ai cdc ph
inf 9592
    
```

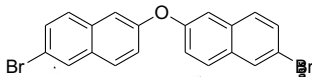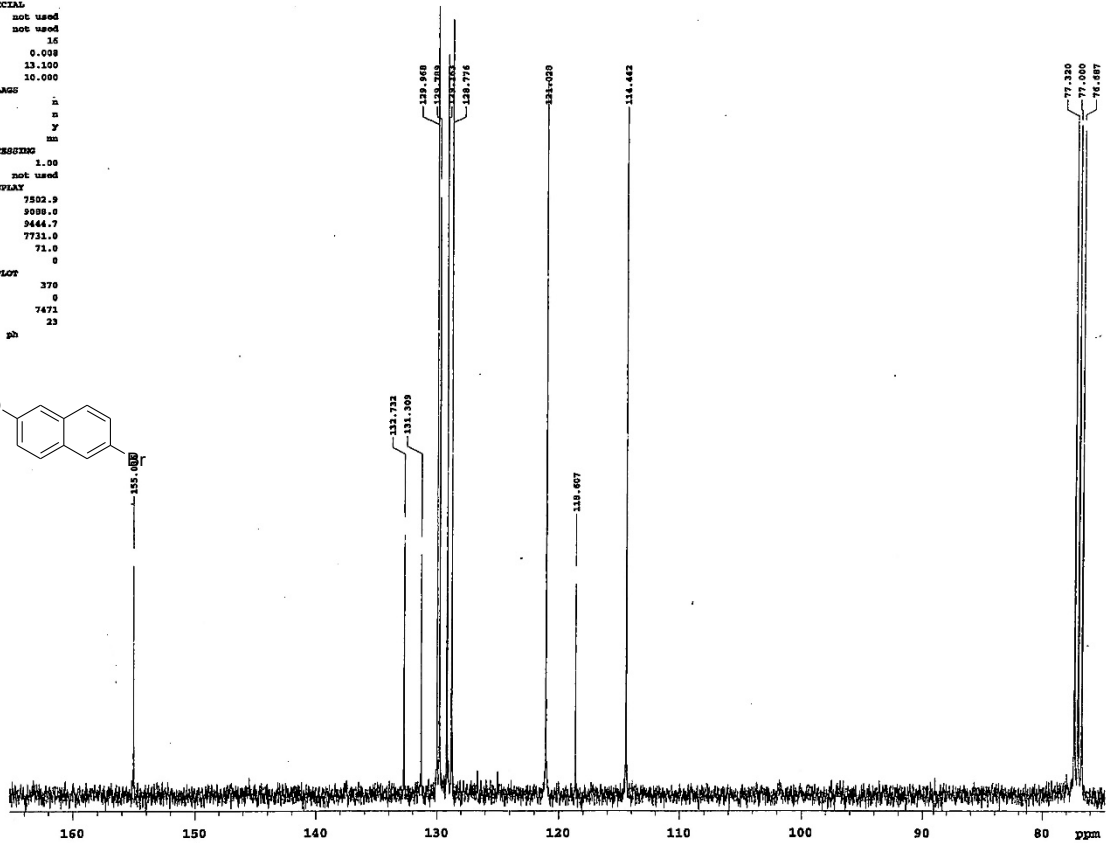

# 7,7'-Oxybis(2-bromonaphthalene) (2c) <sup>1</sup>H-NMR

exp4 Proton

```

SAMPLE          SPECIAL
Date Apr 23 2019 temp not used
solvent cdcl3 gain not used
file /media/disk/s- spin 16
i-Data_Subject- hat 0.008
ation/7,7'-Oxybis(- pw90 14.500
i-bromonaphthalene- aifa 10.000
) _1H.fid      FLAGS
ACQUISITION    il n
sw 6410.3 in n
st 1.500 sp y
sp 44872 hs nm
zb 4000 PROCESSING
bs 4 lb 0.20
sl 1.500 fm not used
st 16 DISPLAY
ot 16 sp 2889.2
TRANSMITTER    wp 4299.8
ta HI xfl 809.1
sfreq 395.290 rfp 0
tof 399.3 xp 79.3
tpwr 59 lp 0
pw 7.300 PLOT
DECOUPLER      wc 120
dn c13 ac 100
dof 0 va 178
dm nm ch 16
dmm c ai odc ph
dprc 41
dnt 29412
    
```

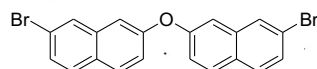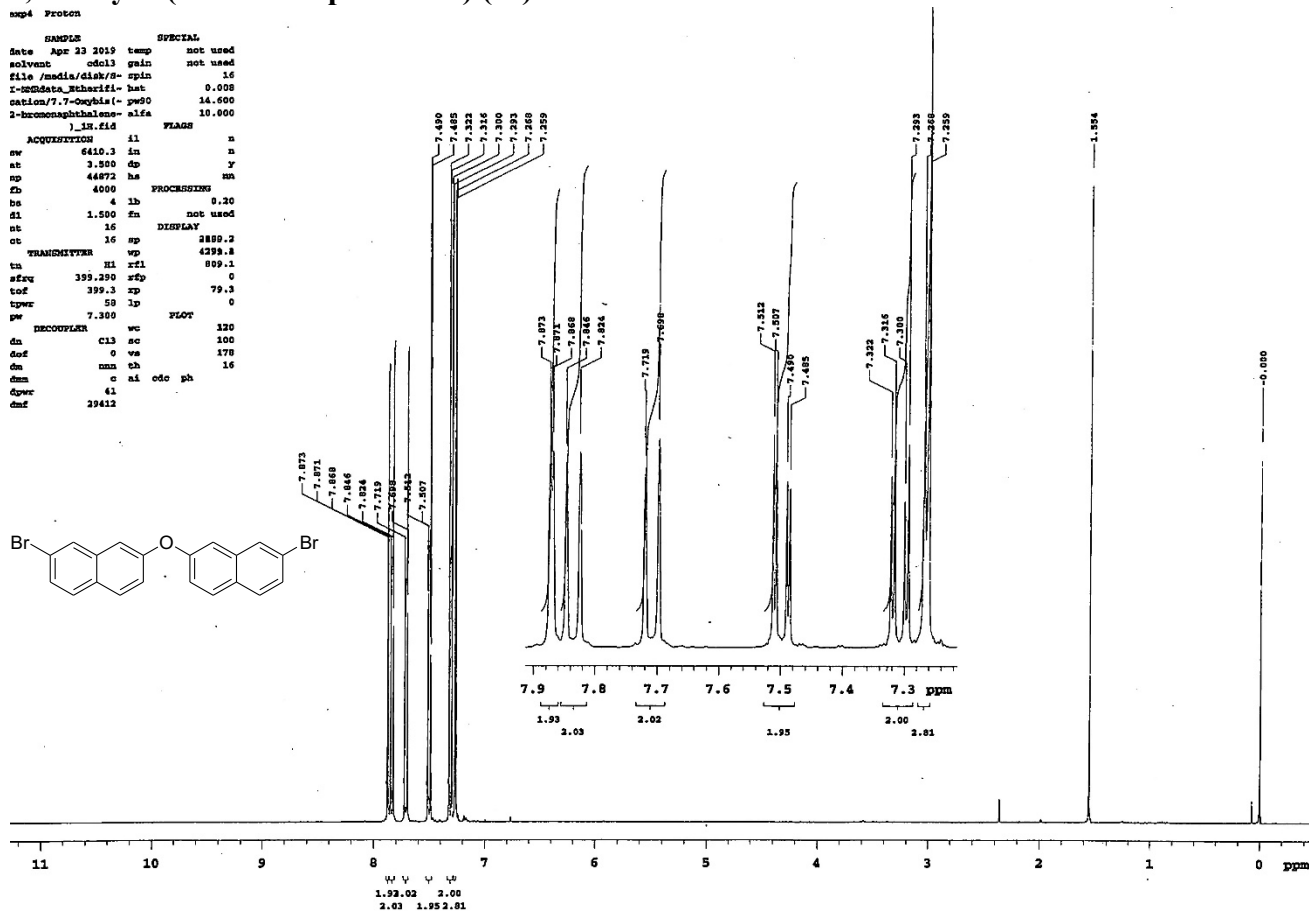

# 7,7'-Oxybis(2-bromonaphthalene) (2c) <sup>13</sup>C-NMR

exp4 Carbon

```

SAMPLE          SPECIAL
Date Apr 23 2019 temp not used
solvent cdcl3 gain not used
file /media/disk/s- spin 16
i-Data_Subject- hat 0.008
ation/7,7'-Oxybis(- pw90 13.100
i-bromonaphthalene- aifa 10.000
) _13C.fid     FLAGS
ACQUISITION    il n
sw 24509.8 in n
st 1.300 sp y
sp 61750 hs nm
zb 17000 PROCESSING
bs 16 lb 1.00
sl 0.700 fm not used
st 102400 DISPLAY
ot 10944 sp 7575.2
TRANSMITTER    wp 8959.1
ta c13 xfl 9444.7
sfreq 100.611 rfp 7735.9
tof 1026.9 xp -121.6
tpwr 60 lp 0
pw 6.590 PLOT
DECOUPLER      wc 370
dn HI oc 0
dof 300.0 va 14947
dm W ch 17
dmm w ai odc ph
dprc 42
dnt 9592
    
```

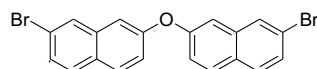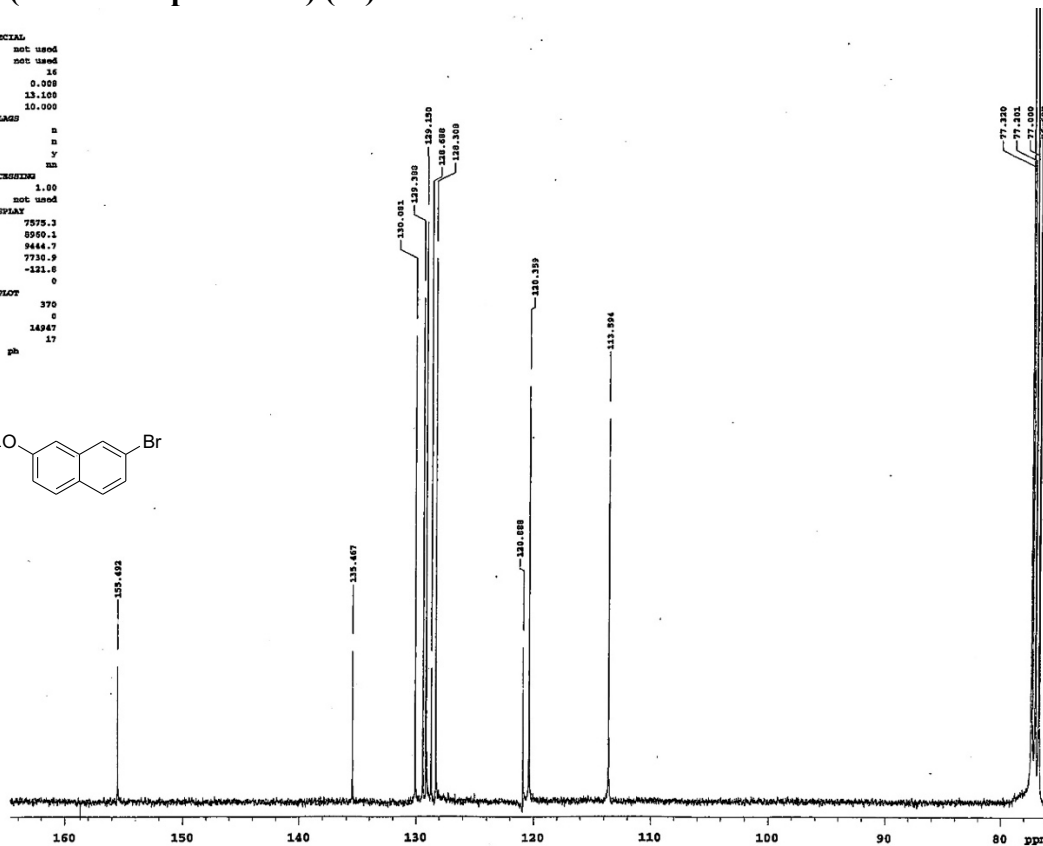



# 6,6'-Oxybis(2-methylnaphthalene) (2d) <sup>1</sup>H-NMR

SAMPLE SPECIAL  
date Feb 6 2019 temp not used  
solvent cdcl3 gain not used  
file /media/disk/8- spin 16  
I-NMRdata\_Scharif1- hat 0.008  
cation/6,6'-Oxybis(- pw90 14.600  
2-methylnaphthalen- alfa 10.000  
e)\_1h.fid

ACQUISITION il n  
sw 6410.3 in n  
at 3.500 dp y  
np 44972 hs nm  
zb 4000  
dl 1.500 fa not used  
nt 16  
ct 16 sp 2889.0  
TRANSMITTER wp 4234.3  
ts il sll 829.8  
sfrq 399.299 sfp 0  
tof 399.3 sp 48.1  
tpwr 58 lp 0  
pw 7.300 PLOT 0

DECOUPLER wa 300  
dn c13 sc 100  
dof 0 vs 898  
dm nnn th 6  
dmn w al odc ph 6  
dpr 41  
dmf 29412

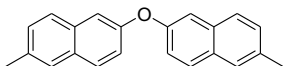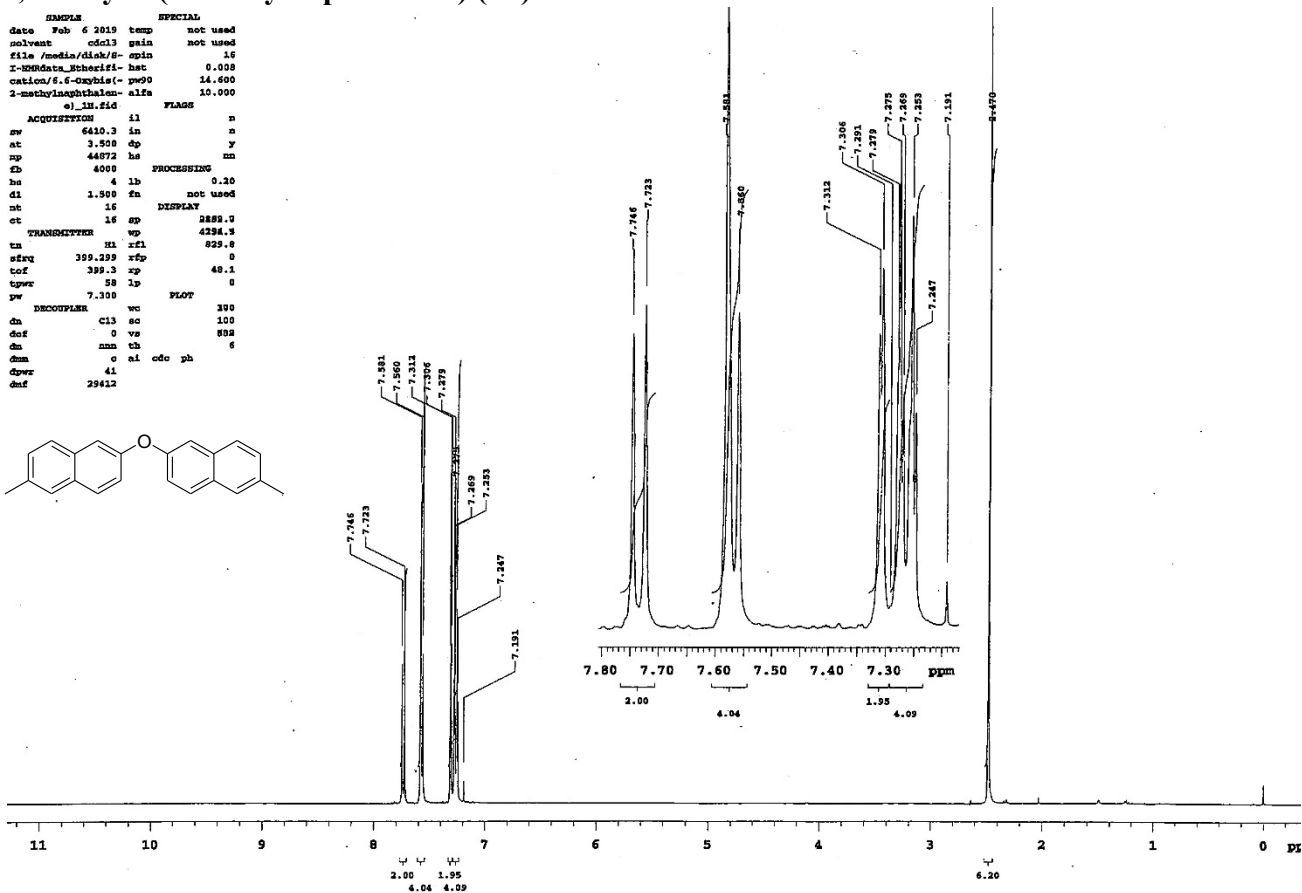

# 6,6'-Oxybis(2-methylnaphthalene) (2d) <sup>13</sup>C-NMR

SAMPLE SPECIAL  
date Feb 6 2019 temp not used  
solvent cdcl3 gain not used  
file /media/disk/8- spin 16  
I-NMRdata\_Scharif1- hat 0.008  
cation/6,6'-Oxybis(- pw90 13.100  
2-methylnaphthalen- alfa 10.000  
e)\_13c.fid

ACQUISITION il n  
sw 24509.0 in n  
at 1.300 dp y  
np 63750 hs nm  
zb 17000  
dl 0.700 fa not used  
nt 10000  
ct 176 sp 1962.6  
TRANSMITTER wp 13796.3  
ts il sll 9450.7  
sfrq 100.614 rfd 7731.0  
tof 1026.8 sp -119.6  
tpwr 60 lp 0  
pw 6.500 PLOT 0

DECOUPLER wa 370  
dn H1 sc 0  
dof 300.0 vs 2306  
dm xxx th 26  
dmn w al odc ph 26  
dpr 41  
dmf 8592

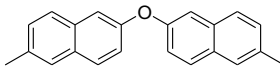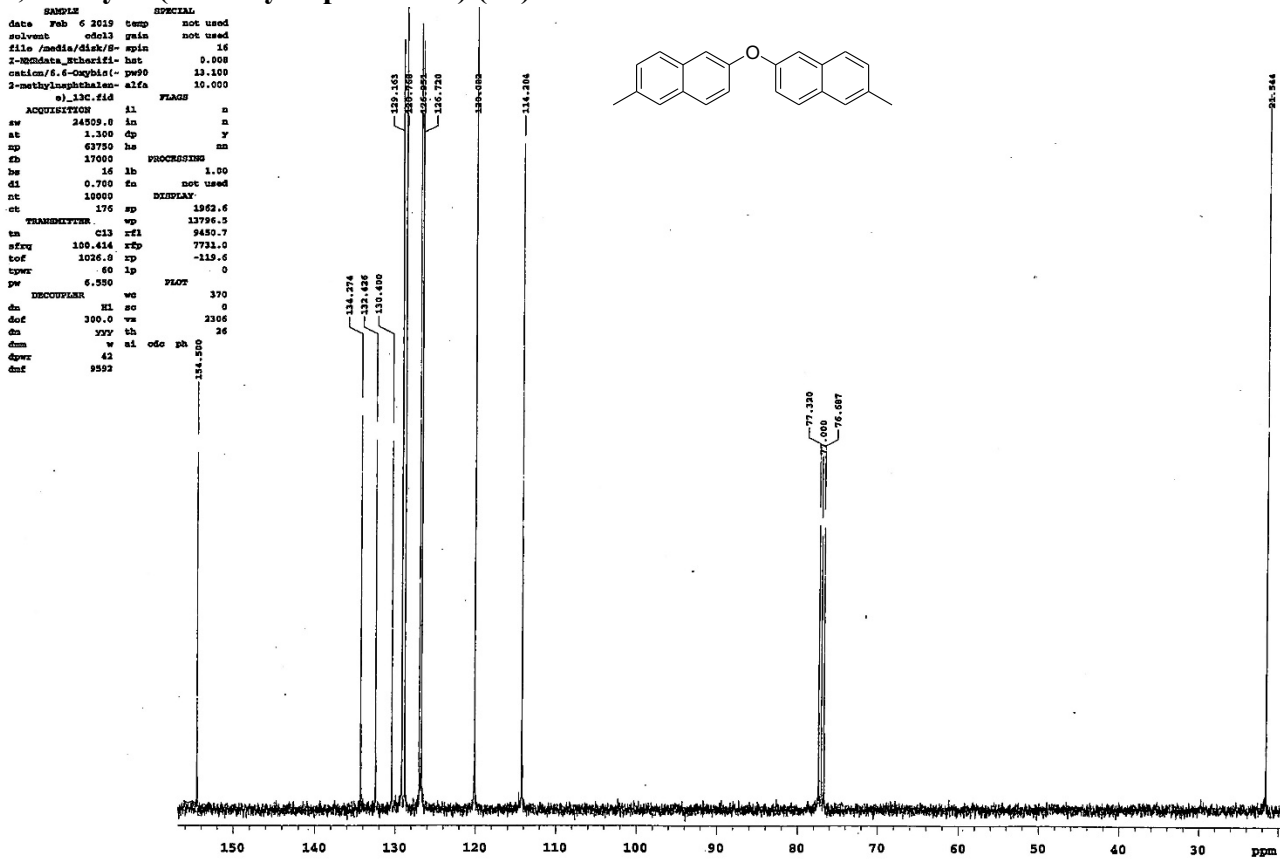

# 6,6'-Oxybis(2-chloronaphthalene) (2e) <sup>1</sup>H-NMR

exp4 Proton

```

SAMPLE          SPECIAL
date Jun 4 2019 temp not used
solvent cdcl3 gain not used
file /media/disk/# spin 16
1-NAMEdata_RNbarif- bet 0.098
cation/6,6'-Oxybis(- pu90 14.600
2-chloronaphthalen- alfa 10.000
e)_1h.fid          FLAGS
ACQUISITION    il n
sv 6410.3 in n
at 3.500 dp y
sp 44872 hs mm
zb 6000 PROCESSING
hs 4 lb 0.20
dl 1.500 fm not used
nt 16 DISPLAY 2825.6
TRANSMITTER    wp 4298.5
tn H1 xfl 909.4
sfreq 399.283 rfp 0
tof 399.3 rfp 78.6
tprw 50 lp 0
pw 7.300 PLOT
DECOUPLER      wc 320
dn C13 sc 90
dof 0 vs 323
dm mm th 15
dms w ai odc ph
dprw 41
dmf 29412
    
```

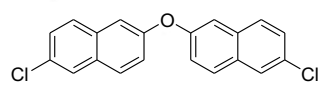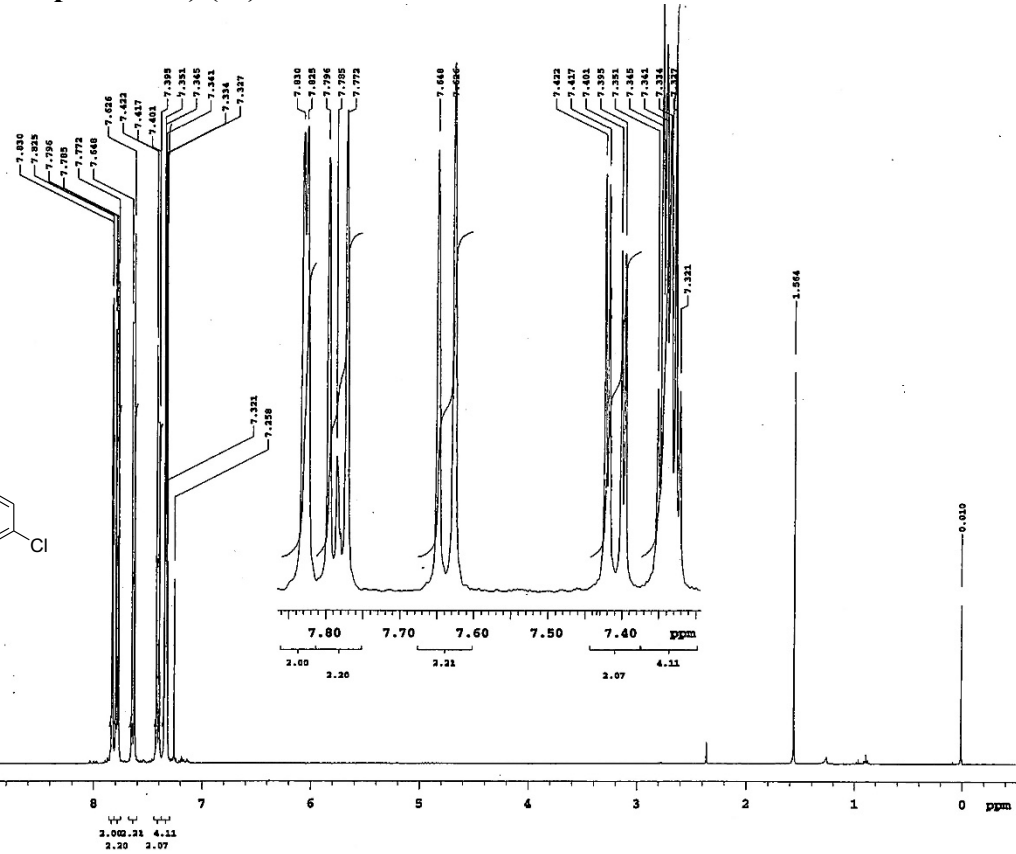

# 6,6'-Oxybis(2-chloronaphthalene) (2e) <sup>13</sup>C-NMR

exp4 Carbon

```

SAMPLE          SPECIAL
date Jun 4 2019 temp not used
solvent cdcl3 gain not used
file /media/disk/# spin 16
1-NAMEdata_RNbarif- bet 0.000
cation/6,6'-Oxybis(- pu90 13.100
2-chloronaphthalen- alfa 10.000
e)_13c.fid          FLAGS
ACQUISITION    il n
sv 24509.8 in n
at 1.300 dp y
sp 63750 hs mm
zb 17000 PROCESSING
hs 16 lb 1.00
dl 0.700 fm not used
nt 10240 DISPLAY 7427.8
TRANSMITTER    wp 9124.6
tn C13 xfl 9446.2
sfreq 100.430 rfp 7730.7
tof 1024.8 rfp -144.1
tprw 50 lp 0
pw 6.550 PLOT
DECOUPLER      wc 370
dn H1 sc 0
dof 300.0 vs 4409
dm F1P th 15
dms w ai odc ph
dprw 42
dmf 9592
    
```

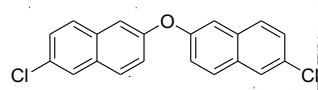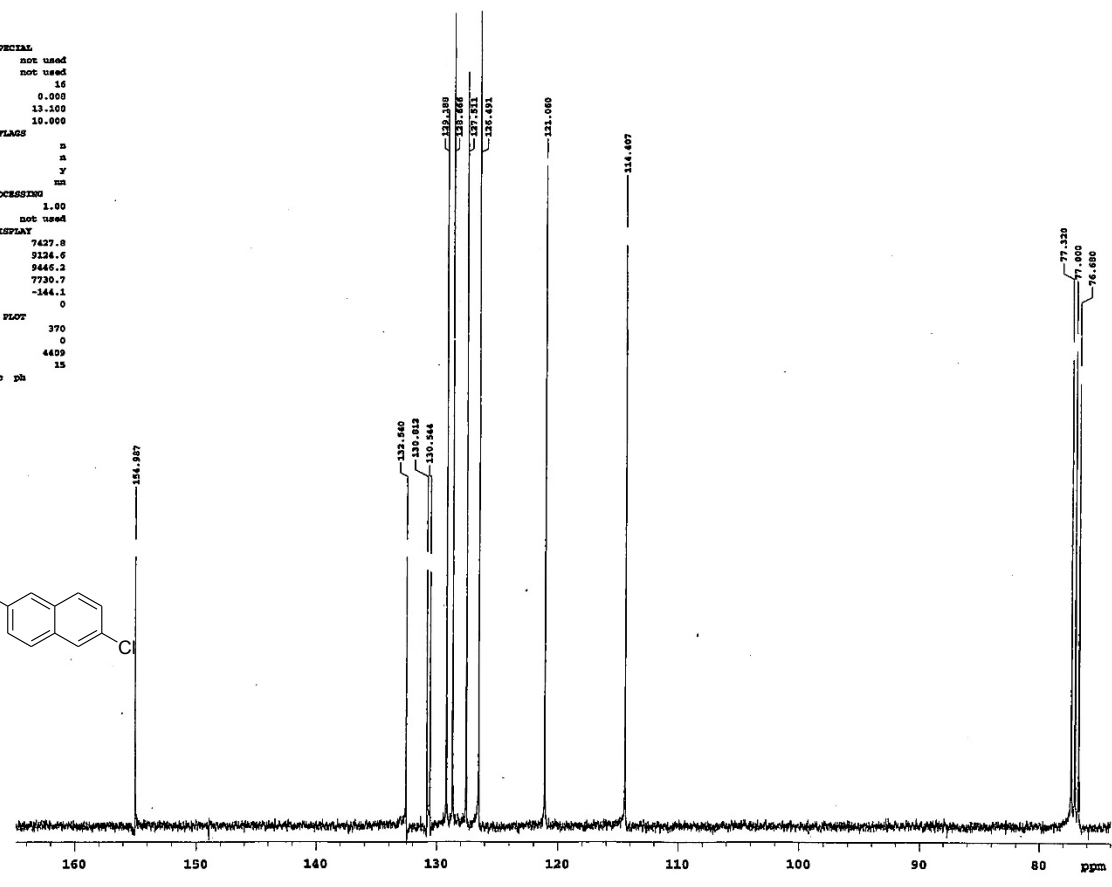

# 1,1-Oxybisanthracene (2f) <sup>1</sup>H-NMR

exp4 Proton

| SAMPLE              |                     | SPECIAL |          |
|---------------------|---------------------|---------|----------|
| date                | Apr 23 2019         | temp    | not used |
| solvent             | cdcl3               | gain    | not used |
| file                | /media/disk/m- spin |         | 16       |
| MR/exp180_1-naphth- | hat                 |         | 0.008    |
| lotheser_1h.fid     | pw90                |         | 14.900   |
| ACQUISITION         | aire                |         | 10.000   |
| PROCCESSING         |                     | FLAGS   |          |
| sv                  | 6410.3              |         |          |
| at                  | 3.500               | il      | n        |
| ap                  | 44872               | in      | n        |
| sb                  | 4000                | cp      | y        |
| hs                  | 4                   | ho      | nm       |
| dl                  | 1.500               |         |          |
| nt                  | 16                  | fn      | 0.20     |
| ot                  | 16                  | fn      | not used |
| TRANSMITTER         |                     | DISPLAY |          |
| tn                  | 399.290             | sp      | 8899.0   |
| afrc                | 399.290             | wp      | 4884.0   |
| toF                 | 399.3               | rfl     | 811.3    |
| tpwr                | 50                  | rfp     | 0        |
| pw                  | 7.300               | rp      | 69.1     |
| DECOUPLER           |                     | PLOT    |          |
| dn                  | C13                 | wo      | 300      |
| doF                 | 0                   | wo      | 70       |
| dm                  | c                   | vs      | 545      |
| dpwr                | 41                  | th      | 13       |
| dmf                 | 29412               | ai      | odo ph   |

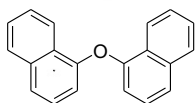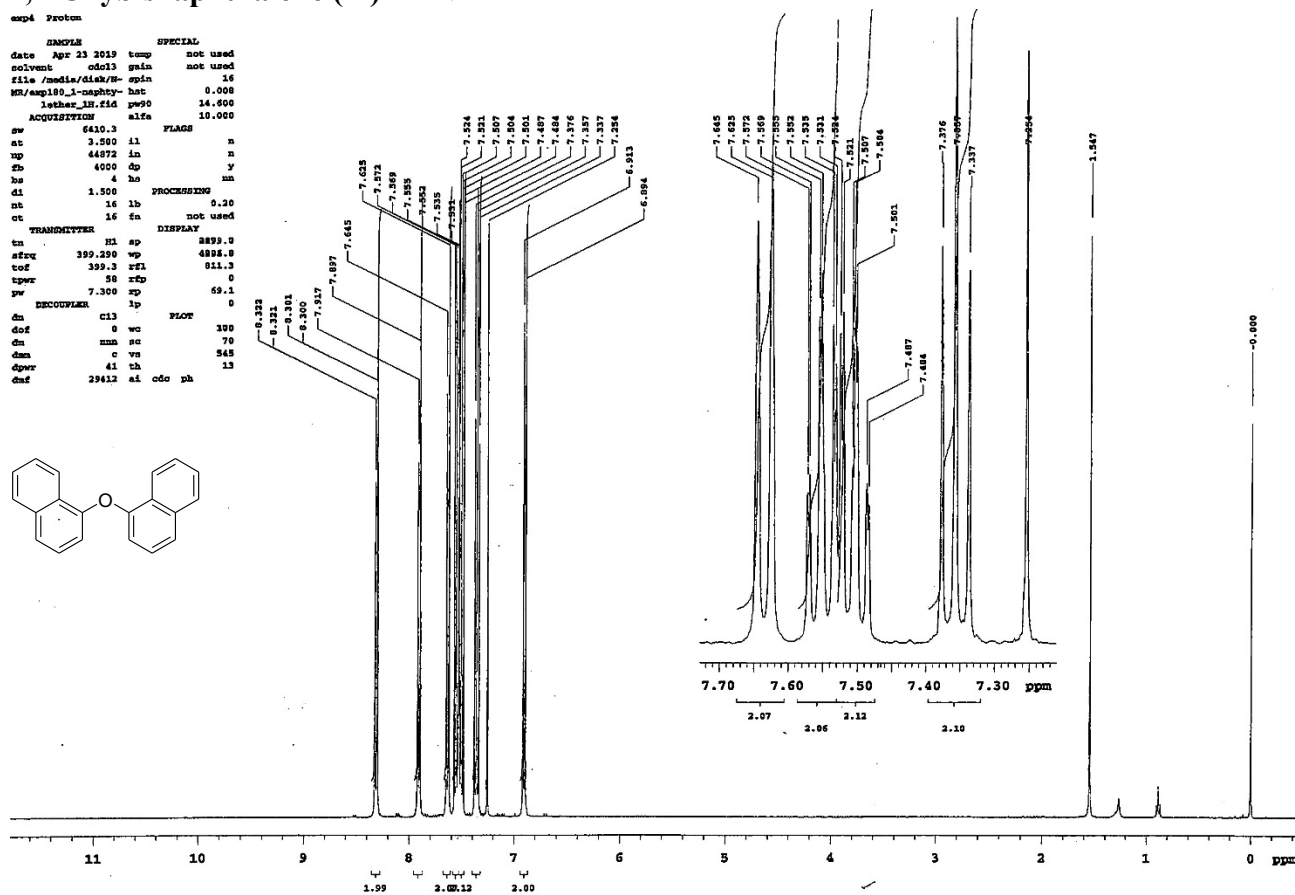

# 1,1-Oxybisanthracene (2f) <sup>13</sup>C-NMR

exp4 Carbon

| SAMPLE              |                     | SPECIAL |          |
|---------------------|---------------------|---------|----------|
| date                | Apr 23 2019         | temp    | not used |
| solvent             | cdcl3               | gain    | not used |
| file                | /media/disk/m- spin |         | 16       |
| MR/exp180_1-naphth- | hat                 |         | 0.008    |
| lotheser_13c.fid    | pw90                |         | 15.100   |
| ACQUISITION         | aire                |         | 10.000   |
| PROCCESSING         |                     | FLAGS   |          |
| sv                  | 24509.8             |         |          |
| at                  | 1.300               | il      | n        |
| ap                  | 83730               | in      | n        |
| sb                  | 17000               | cp      | y        |
| hs                  | 16                  | hs      | nm       |
| dl                  | 0.700               |         |          |
| nt                  | 28000               | lb      | 1.00     |
| ot                  | 18088               | fn      | not used |
| TRANSMITTER         |                     | DISPLAY |          |
| tn                  | C13                 | sp      | 7483.3   |
| afrc                | 100.411             | wp      | 9088.0   |
| toF                 | 1026.9              | rfl     | 8445.5   |
| tpwr                | 60                  | rfp     | 7730.9   |
| pw                  | 6.550               | rp      | -120.1   |
| DECOUPLER           |                     | PLOT    |          |
| dn                  | 1H                  | wo      | 0        |
| doF                 | 300.0               | wo      | 370      |
| dm                  | yyy                 | no      | 0        |
| dm                  | w                   | vs      | 7141     |
| dpwr                | 43                  | th      | 16       |
| dmf                 | 9593                | ai      | odo ph   |

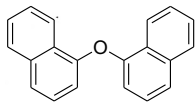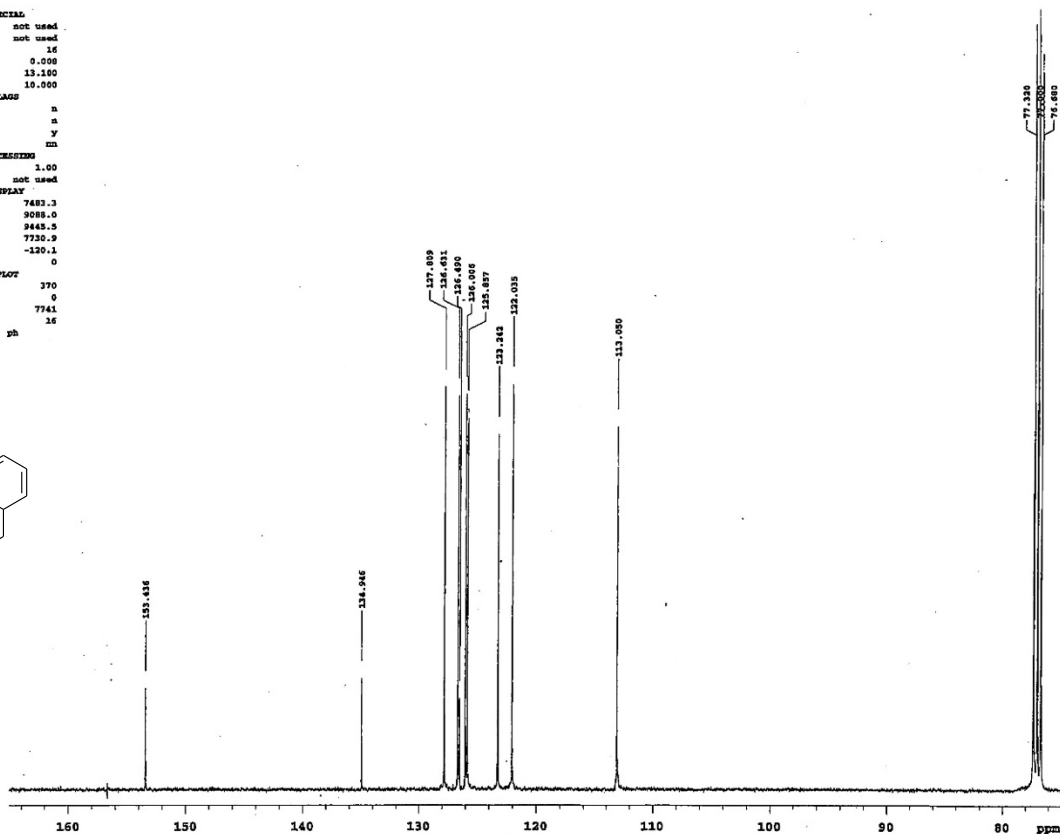

# 5,5'-Oxybis(2,3-dimethylnaphthalene) (2g) <sup>1</sup>H-NMR

```

exp4 Proton
===== SPECIAL
date May 13 2019 temp not used
solvent cdcl3 gain not used
file /media/alex/8- spin 16
I-MWDATA_Rchariffi- hat 0.008
cation/5,5'-Oxybis(- pp90 14.608
2,3-dimethylnaphth- alfa 10.000
alene)_1H.fid
=====
ACQUISITION
sc 6410.3 in n
st 3.500 sp y
sp 44872 hs
zb 4000
hs 4 lb PROCESSING
di 1.500 fa not used
nt 16 DISPLAY 2599.8
ot 16 sp 4382.3
=====
TRANSMITTER
na HI rfl 813.2
afsq 399.290 rfp 0
tof 399.3 sp 71.5
tqwr 50 lp 0
pw 7.300
=====
RECOUPLER
dn HI sc 390
dof 0 ve 110
dm mm th 28
dmn c ai odc ph
dpr 41
dnt 29412
    
```

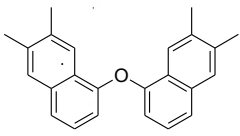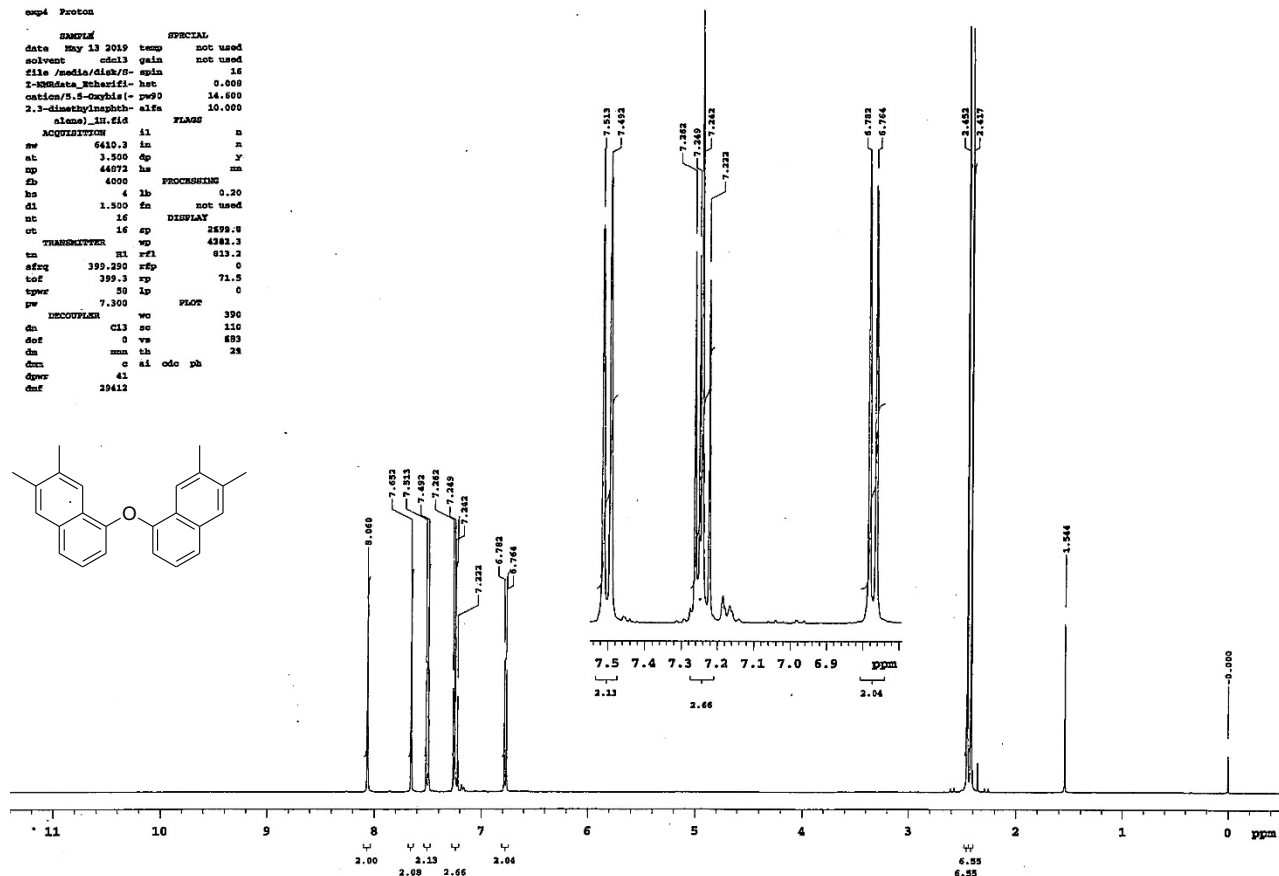

# 5,5'-Oxybis(2,3-dimethylnaphthalene) (2g) <sup>13</sup>C-NMR

```

exp4 Carbon
===== SPECIAL
date May 13 2019 temp not used
solvent cdcl3 gain not used
file /media/alex/8- spin 16
I-MWDATA_Rchariffi- hat 0.008
cation/5,5'-Oxybis(- pp90 13.100
2,3-dimethylnaphth- alfa 10.000
alene)_13C.fid
=====
ACQUISITION
sc 24509.8 in n
st 1.380 sp y
sp 43750 hs
zb 17000
hs 16 lb PROCESSING
di 0.750 fa not used
nt 20000 DISPLAY 1807.5
ot 18024 sp 14781.6
=====
TRANSMITTER
na HI rfl 2445.3
afsq 100.411 rfp 7730.9
tof 1026.9 sp -114.2
tqwr 50 lp 0
pw 6.550
=====
RECOUPLER
dn HI sc 370
dof 300.0 ve 10158
dm mm th 35
dmn c ai odc ph
dpr 42
dnt 9592
    
```

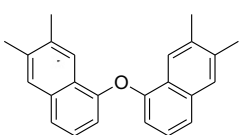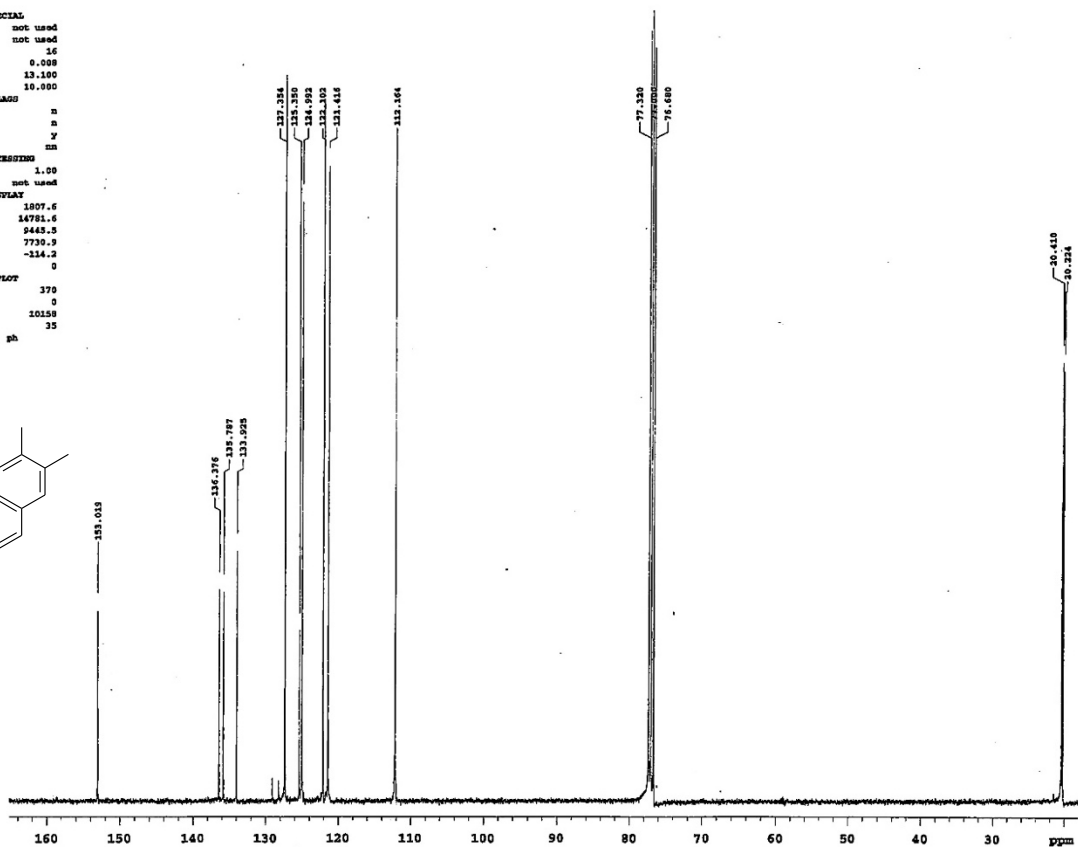

# 4,4'-Oxybis(1,6,7-trimethylnaphthalene) (2h) <sup>1</sup>H-NMR

exp4 Proton

```

SAMPLE          SPECIAL
date    May 27 2019 temp    not used
solvent  cdcl3 gain    not used
file  /media/disk/g- spin    16
I-NMRdata_Rhbarfi- hart    0.008
cation/4,4'-Oxybis(-pw90  14.000
1,6,7-trimethylnap- alfa  10.000
hthalene)_1h.fid          FLAGS

ACQUISITION    il    n
sv    6410.3 in    n
sc    1.500 sp    y
ap    44872 hs    nm
sh    4000          PROCESSING
bs    4 lb    0.20
dl    1.500 fm    not used
ss    16          DISPLAY
ct    16 sp    2888.3
TRANSMITTER    wp    4281.1
tn    hl rfl    821.0
sfreq  399.283 rfp    0
conf   399.5 xp    78.7
tpwr   58 lp    0
pw     7.300          PLOT
RECOVERER      wo    370
dn      hl    0
dof     300.0 vs    5695
dn      yyf th    30
dm      w    ai odc ph
dpr     43
dnt     9592
    
```

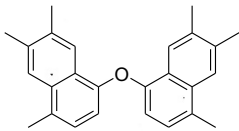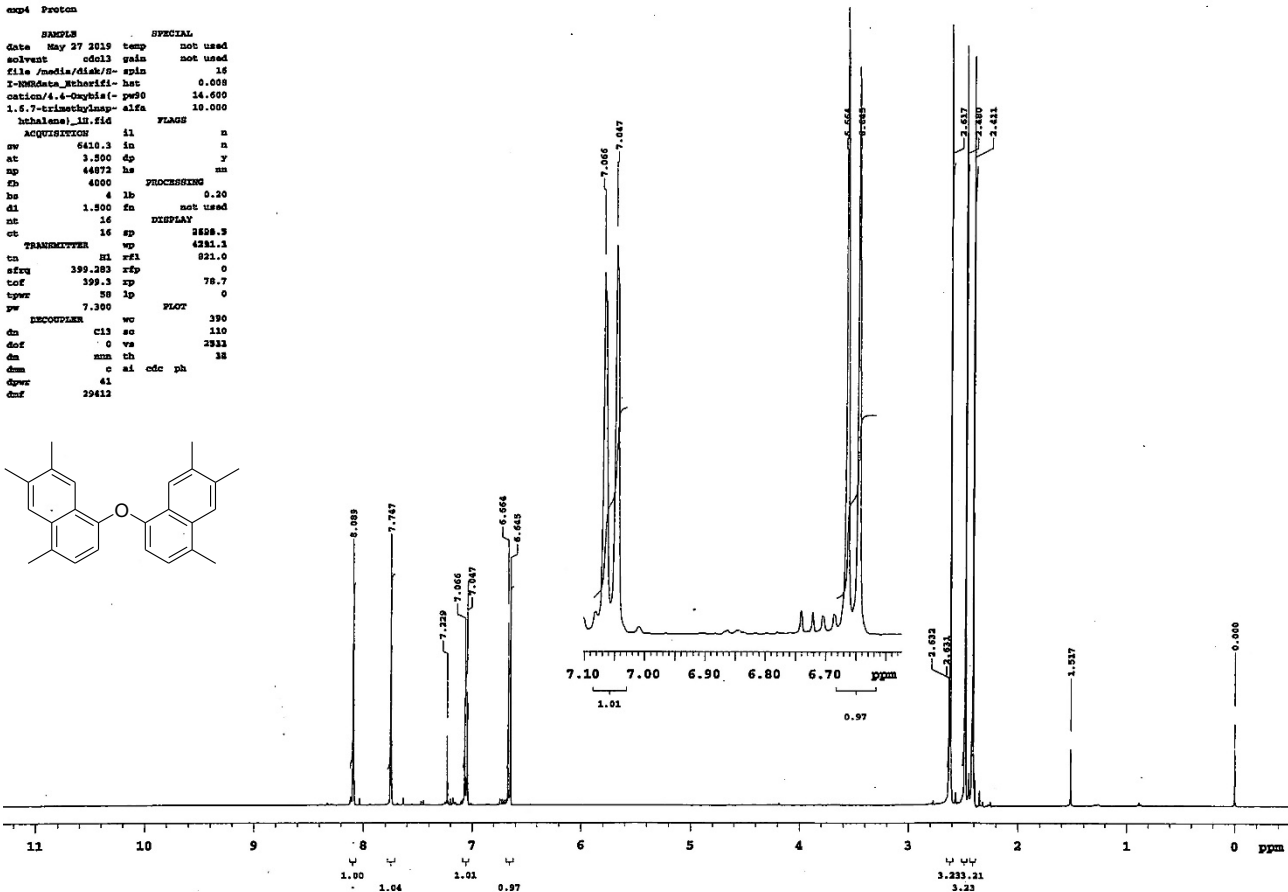

# 4,4'-Oxybis(1,6,7-trimethylnaphthalene) (2h) <sup>13</sup>C-NMR

exp4 Carbon

```

SAMPLE          SPECIAL
date    May 27 2019 temp    not used
solvent  cdcl3 gain    not used
file  /media/disk/g- spin    16
I-NMRdata_Rhbarfi- hart    0.008
cation/4,4'-Oxybis(-pw90  13.100
1,6,7-trimethylnap- alfa  10.000
hthalene)_13c.fid          FLAGS

ACQUISITION    il    n
sv    24509.8 in    n
at    1.300 sp    y
ap    63750 hs    nm
sh    17000          PROCESSING
bs    16 lb    1.00
dl    0.700 fm    not used
nt    20000          DISPLAY
ct    1616 sp    1714.0
TRANSMITTER    wp    14819.2
tn    cl3 rfl    9447.7
sfreq  100.410 rfp    7730.3
conf   1026.0 rp    -124.0
tpwr   60 lp    0
pw     6.550          PLOT
RECOVERER      wo    370
dn      hl    0
dof     300.0 vs    5695
dn      yyf th    30
dm      w    ai odc ph
dpr     43
dnt     9592
    
```

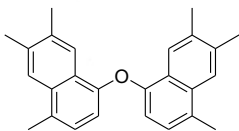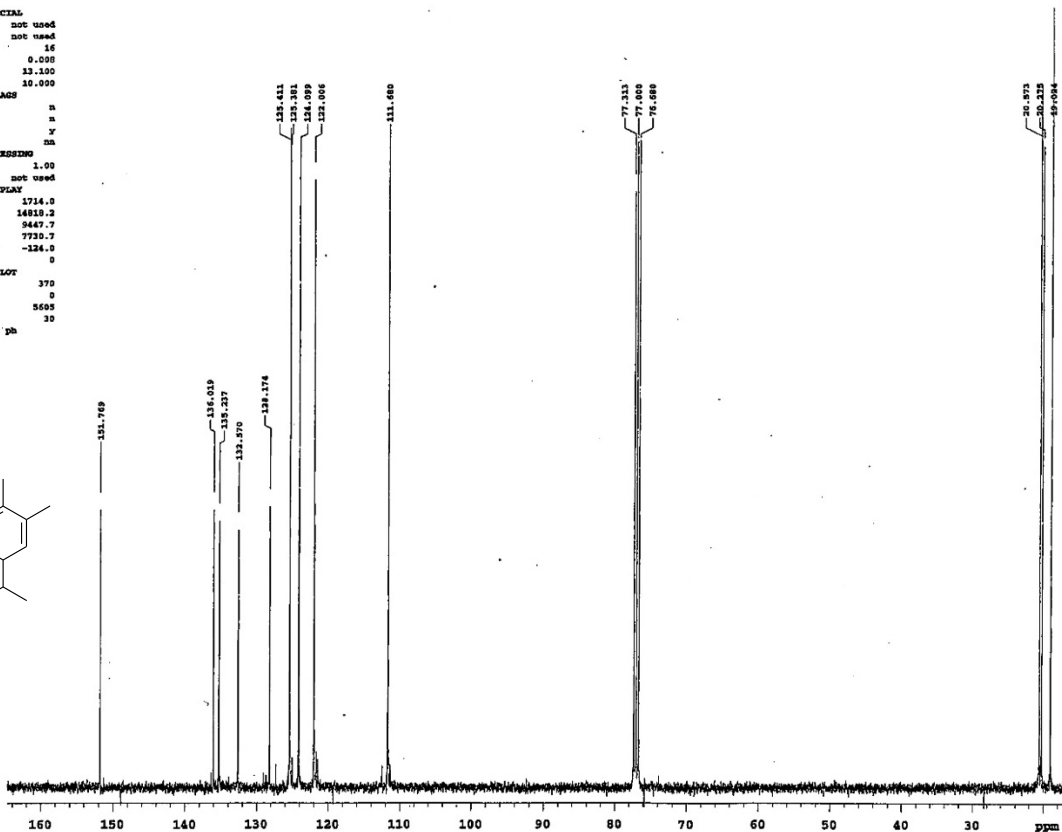

# 4,4'-Oxybis(1-methylnaphthalene) (2i) <sup>1</sup>H-NMR

exp4 Proton

```

SAMPLE          SPECIAL
date    May 24 2019    temp    not used
solvent  cdcl3         gain    not used
file    /media/disk/s- spin    16
X-NAMEdata_Rhbarf1- hat    0.000
cation/4,4'-Oxybis(= pw90    16.000
1-methylnaphthalen= a1fa    10.000
  e)_13c.fid          FLAGS
ACQUISITION      il      n
sw    6400.0       in      5
at    3.500       dq      y
mp    44872      hs      nm
fb    4000
hs    4           lb      0.20
dl    1.800       dn      not used
nt    16          DISPLAY
ot    16         sp      8899.3
TRANSMITTER      wp      4794.2
tu    H1         rf1     813.2
sfreq 399.283    rfp     0
tof    399.3     xp      72.7
tproc  30        ld      0
pw     7.300
RECOUPLER        wo      370
dn     C13       so      100
dof    0         vn      880
dm     mm        th      16
dmm    c         ai      ods  ph
dprc   41
dmf    28412
    
```

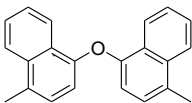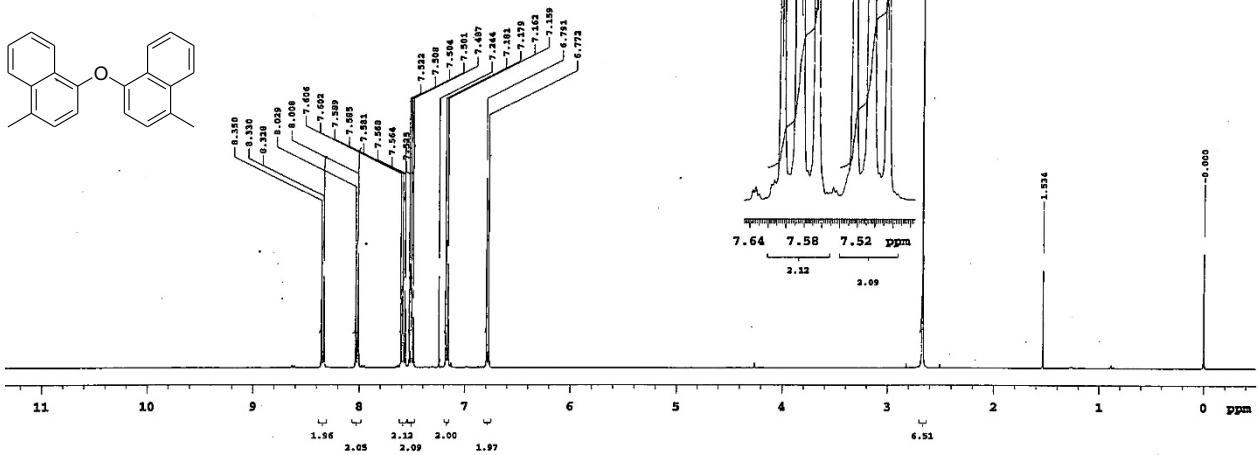

# 4,4'-Oxybis(1-methylnaphthalene) (2i) <sup>13</sup>C-NMR

exp4 Carbon

```

SAMPLE          SPECIAL
date    May 24 2019    temp    not used
solvent  cdcl3         gain    not used
file    /media/disk/s- spin    16
X-NAMEdata_Rhbarf1- hat    0.000
cation/4,4'-Oxybis(= pw90    12.100
1-methylnaphthalen= a1fa    10.000
  e)_13c.fid          FLAGS
ACQUISITION      il      n
sw    24500.0      in      n
at    1.300       dq      y
mp    43750      hs      nm
fb    17000
hs    16         lb      1.00
dl    0.700       dn      not used
nt    20000       DISPLAY
ot    1520       sp      1642.9
TRANSMITTER      wp      14946.1
tu    C13        rf1     9446.2
sfreq 100.610    rfp     7730.7
tof    1026.8    xp      -124.6
tproc  40        ld      0
pw     6.550
RECOUPLER        wo      370
dn     H1         so      0
dof    300.0     vn      7782
dm     Y2Y       th      18
dmm    w         ai      ods  ph
dprc   42
dmf    3552
    
```

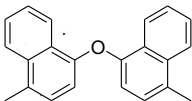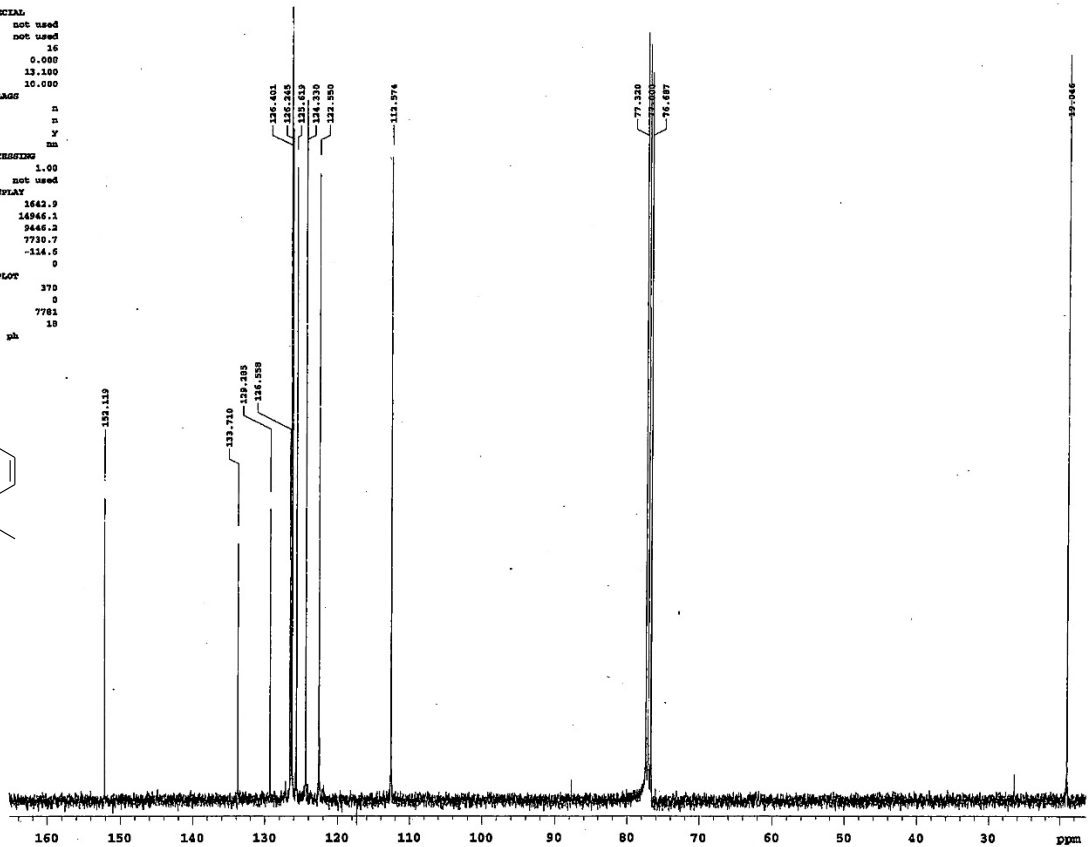

# 5,5'-Oxybis(2,3-dibromonaphthalene) (2j) <sup>1</sup>H-NMR

```

exp4 Proton
=====
SAMPLE          SPECIAL
date Jun 27 2019 temp not used
solvent cdcl3 gain not used
file /media/disk/ spin 16
T-NMRdata_Rbherfi- het 0.008
cation/5,5'-Oxybis(- pu90 14.600
2,3-dibromonaphtha- alfa 10.000
(less)_13c.fid
=====
ACQUISITION    il n
sw 6410.3 in n
st 3.500 sp y
sp 46072 hs nm
fs 4500 PROCESSING
hb 4 lb 0.20
dl 1.500 fn not used
nt 16 DISPLAY 2108.3
ct 16 sp 4398.2
=====
TRANSMITTER    wp 808.5
tn H1 xfl 0
sfreq 399.283 rfp 0
toF 399.3 sp -108.4
tprz 18 lp 0
pw 7.300 PLOT
=====
DECOUPLER      wc 120
dn C13 sc 90
dof 0 vs 180
dm th 18
dms c al cdc ph
dprz 41
dmf 29412
    
```

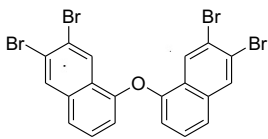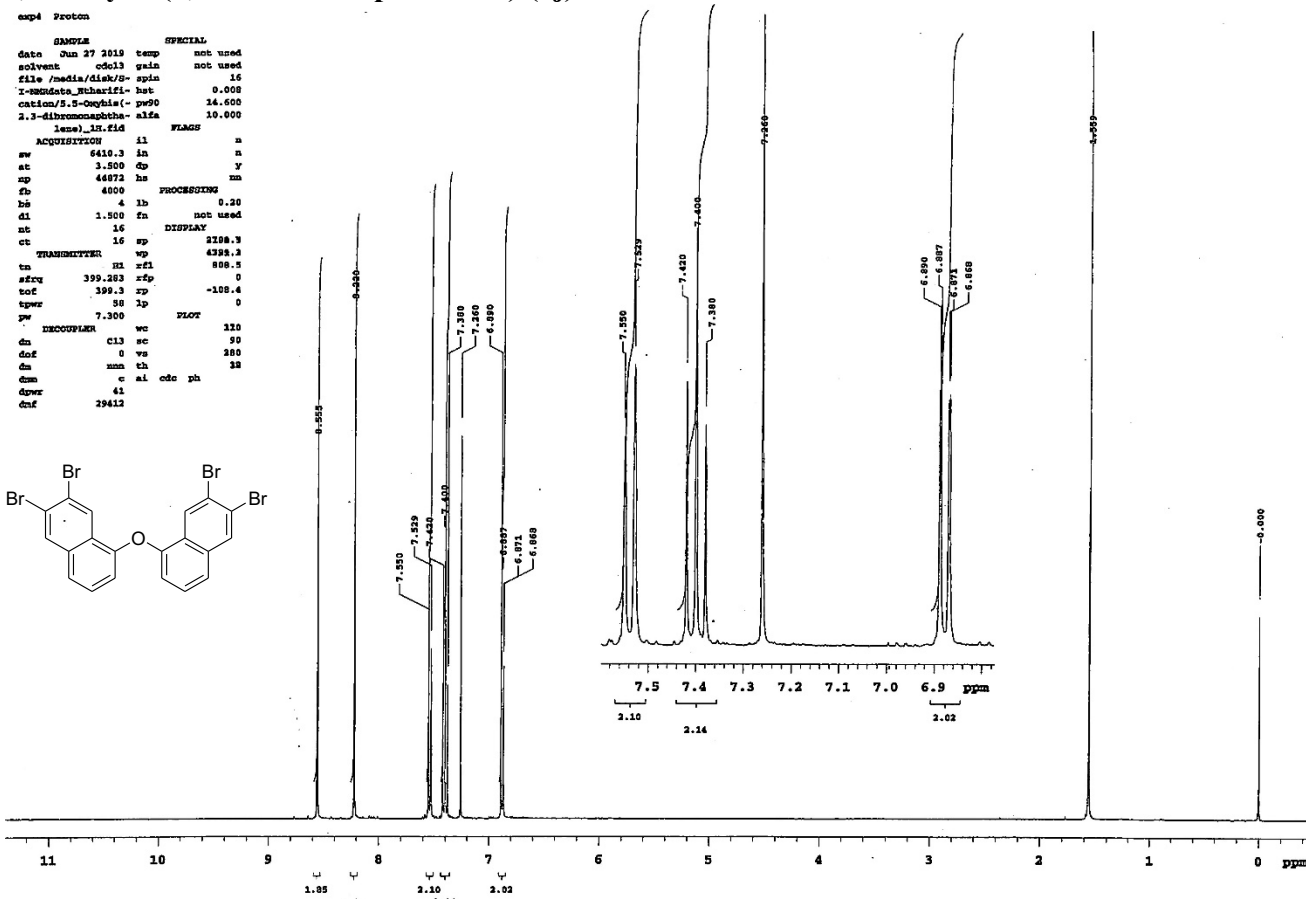

# 5,5'-Oxybis(2,3-dibromonaphthalene) (2j) <sup>13</sup>C-NMR

```

exp4 Carbon
=====
SAMPLE          SPECIAL
date Jun 27 2019 temp not used
solvent cdcl3 gain not used
file /media/disk/ spin 16
T-NMRdata_Rbherfi- het 0.008
cation/5,5'-Oxybis(- pu90 13.500
2,3-dibromonaphtha- alfa 10.000
(less)_13c.fid
=====
ACQUISITION    il n
sw 24509.8 in n
st 1.300 sp y
sp 83750 hs nm
fs 17000 PROCESSING
hb 16 lb 1.00
dl 0.700 fn not used
nt 25000 DISPLAY 7374.7
ct 18752 sp 8179.2
=====
TRANSMITTER    wp 8464.7
tn C13 xfl 9730.7
sfreq 100.440 rfp 57.3
toF 1026.8 sp 0
tprz 60 lp 0
pw 6.850 PLOT
=====
DECOUPLER      wc 370
dn H1 sc 0
dof 100.0 vs 16309
dm th 24
dms v al cdc ph
dprz 42
dmf 5592
    
```

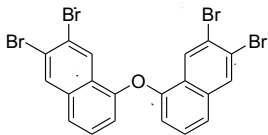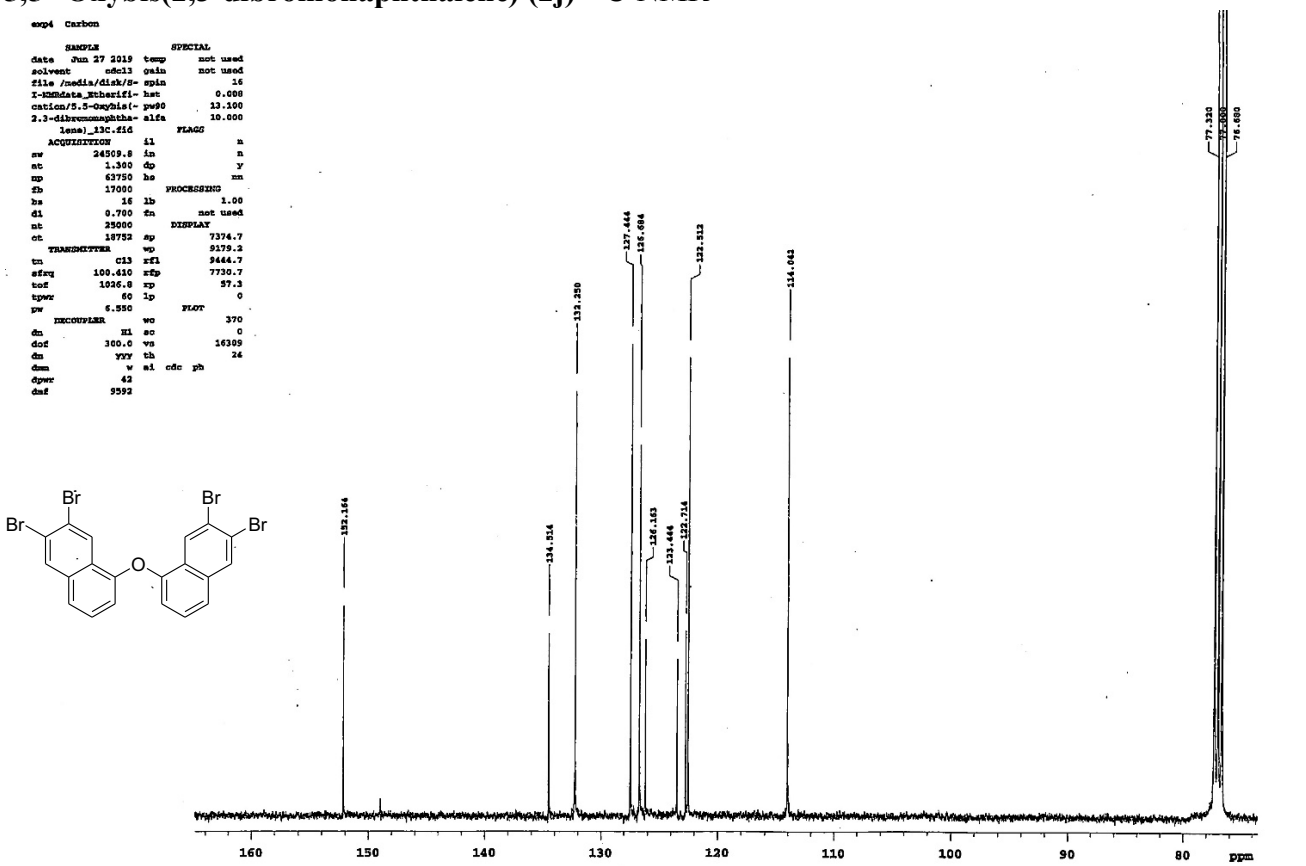

# 9,9'-Oxybisphenanthrene (2k) <sup>1</sup>H-NMR

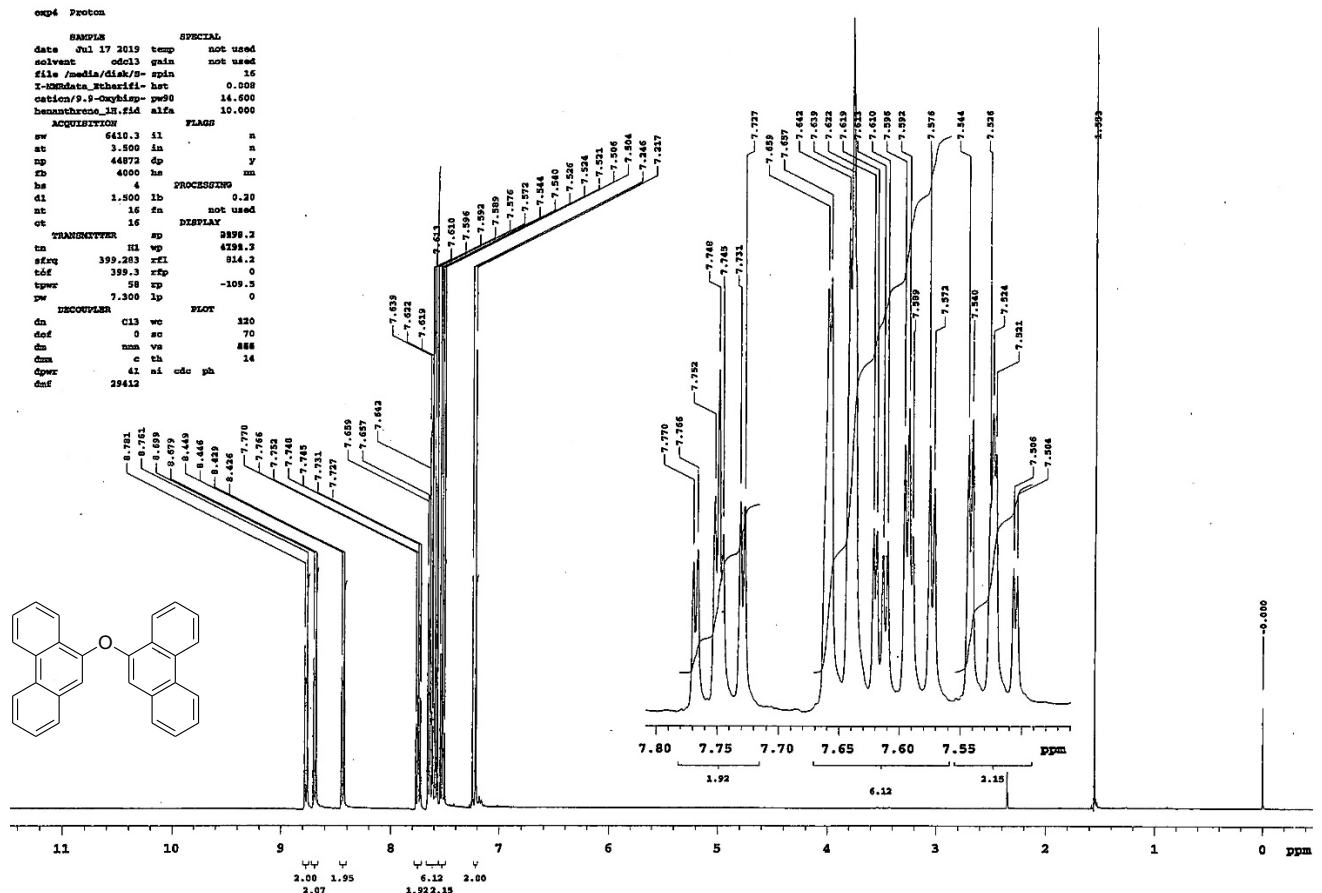

# 9,9'-Oxybisphenanthrene (2k) <sup>13</sup>C-NMR

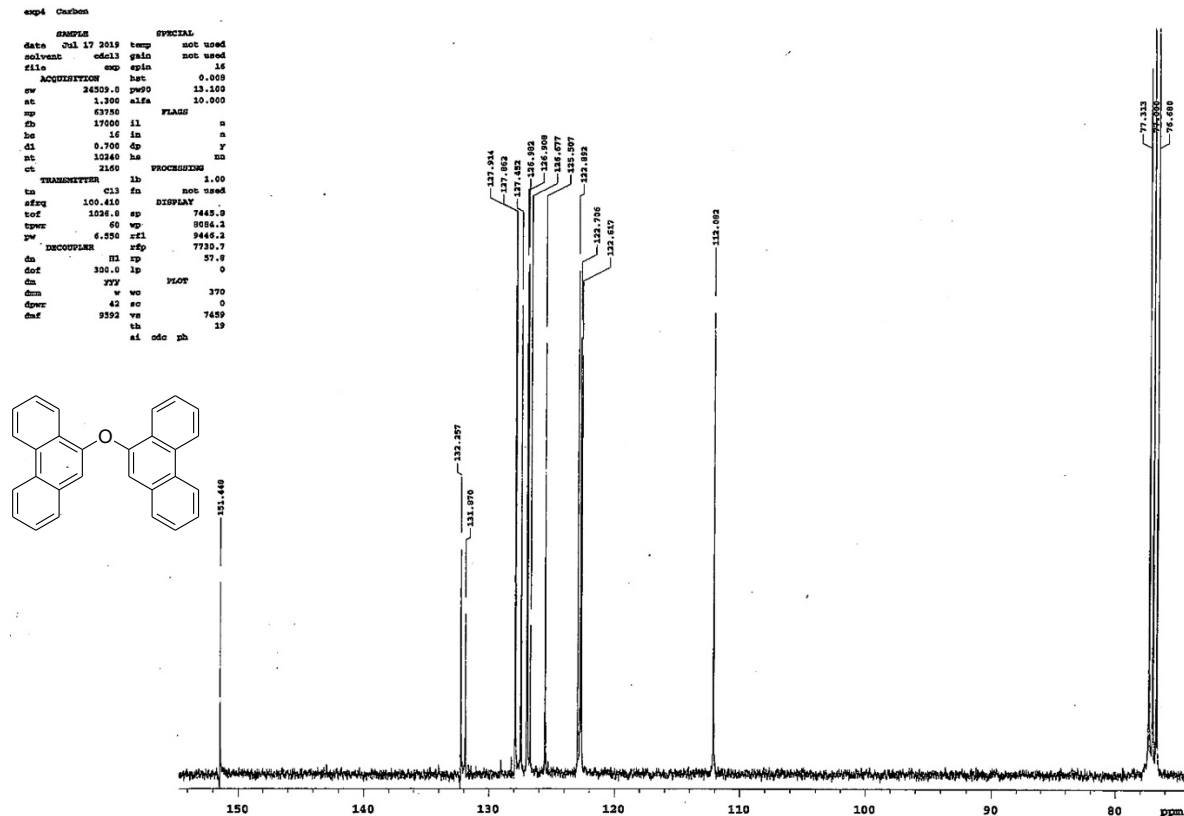



## 2,2'-Oxybisphenanthrene (2l) <sup>1</sup>H-NMR

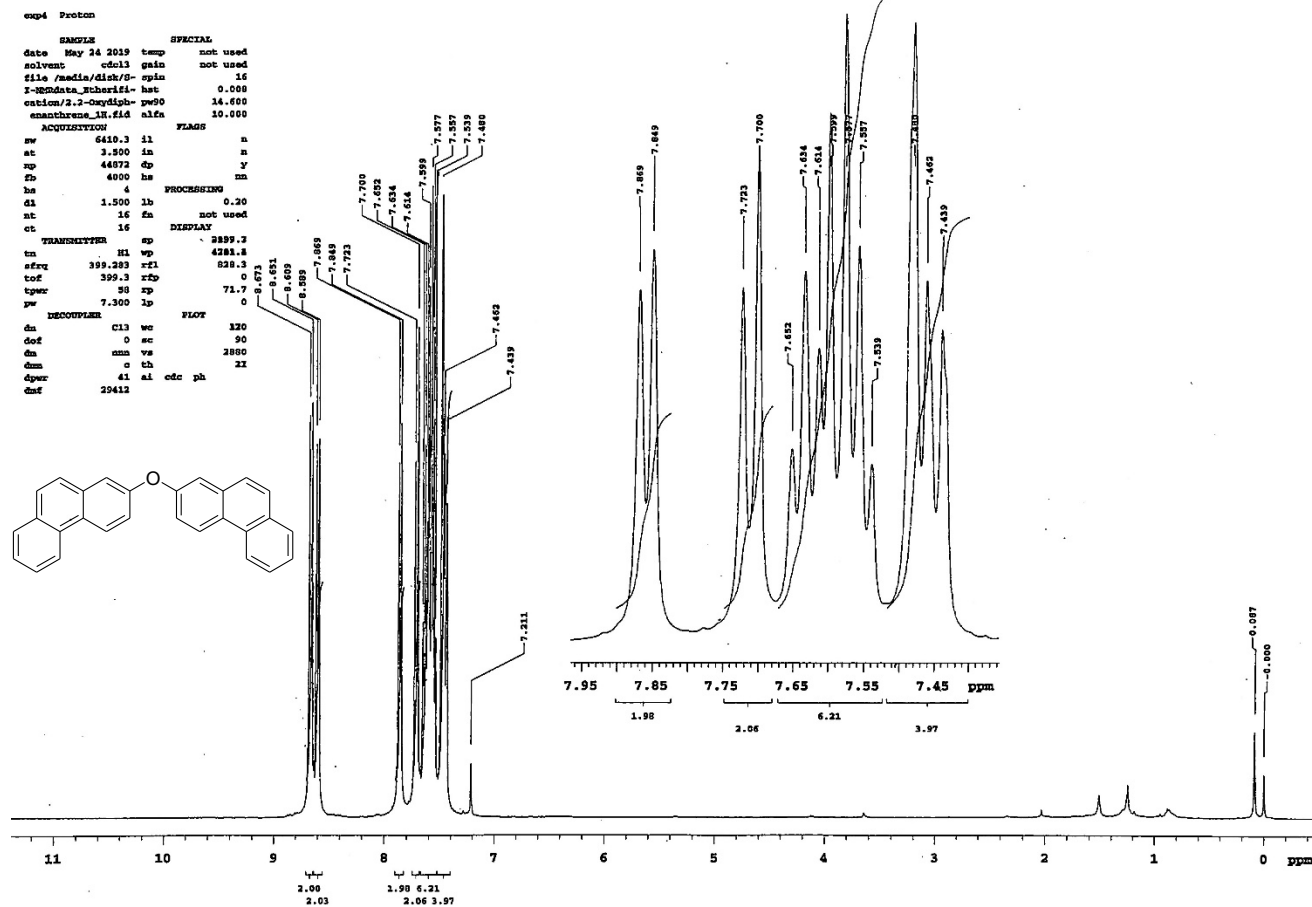

## 2,2'-Oxybisphenanthrene (2l) <sup>13</sup>C-NMR

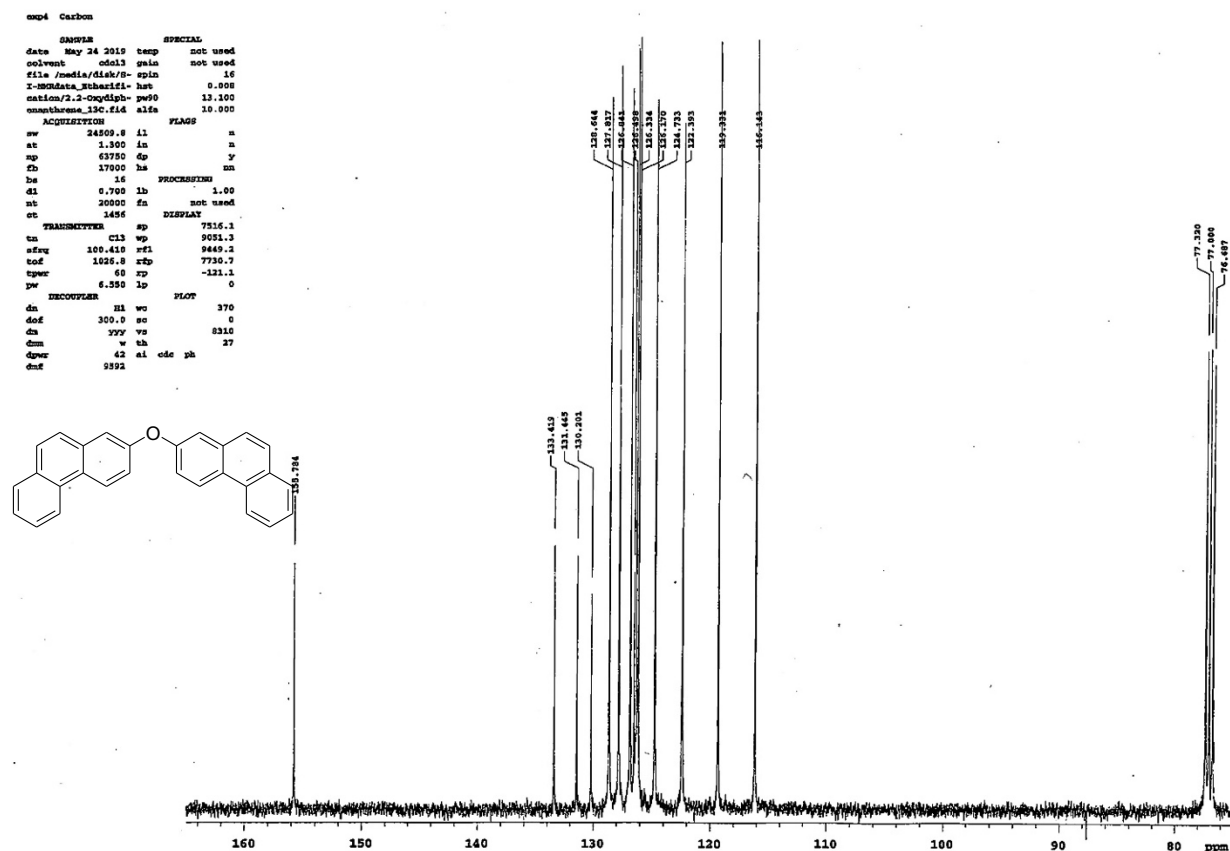

# 4,4'-Oxybispyrene (2m) <sup>1</sup>H-NMR

exp4 Proton

| SAMPLE               |                     | SPECIAL |          |
|----------------------|---------------------|---------|----------|
| date                 | Jul 5 2019          | temp    | not used |
| solvent              | cdcl3               | gain    | not used |
| file                 | /media/disk/8- spin |         | 16       |
| 2-nmdata_chnrifi-    | hut                 |         | 0.008    |
| cation/4,4'-Oxybipy- | pw50                |         | 14.600   |
| name_in.fid          | alfa                |         | 10.000   |
| ACQUISITION          |                     | FLAGS   |          |
| sv                   | 6410.3              | fl      | n        |
| at                   | 1.500               | in      | n        |
| sp                   | 44872               | dp      | y        |
| sb                   | 4000                | hs      | nm       |
| bs                   | 4                   |         |          |
| di                   | 1.500               | lb      | 0.30     |
| nt                   | 16                  | fn      | not used |
| ct                   | 16                  | display |          |
| TRANSMITTER          |                     | SP      |          |
| tn                   | 81                  | wp      | 3189.5   |
| afreq                | 399.213             | rfl     | 4288.3   |
| tof                  | 399.3               | rfd     | 0        |
| tpwr                 | 58                  | sp      | -103.2   |
| pw                   | 7.300               | lp      | 0        |
| DECOUPLER            |                     | F10F    |          |
| dn                   | C13                 | wo      | 320      |
| dcf                  |                     | so      | 90       |
| dm                   | nn                  | vs      | 398      |
| dmm                  | o                   | th      | 12       |
| dqwr                 | 41                  | ni      | cdc      |
| dmf                  | 28412               | ph      |          |

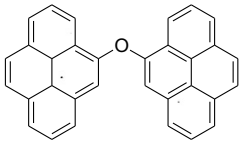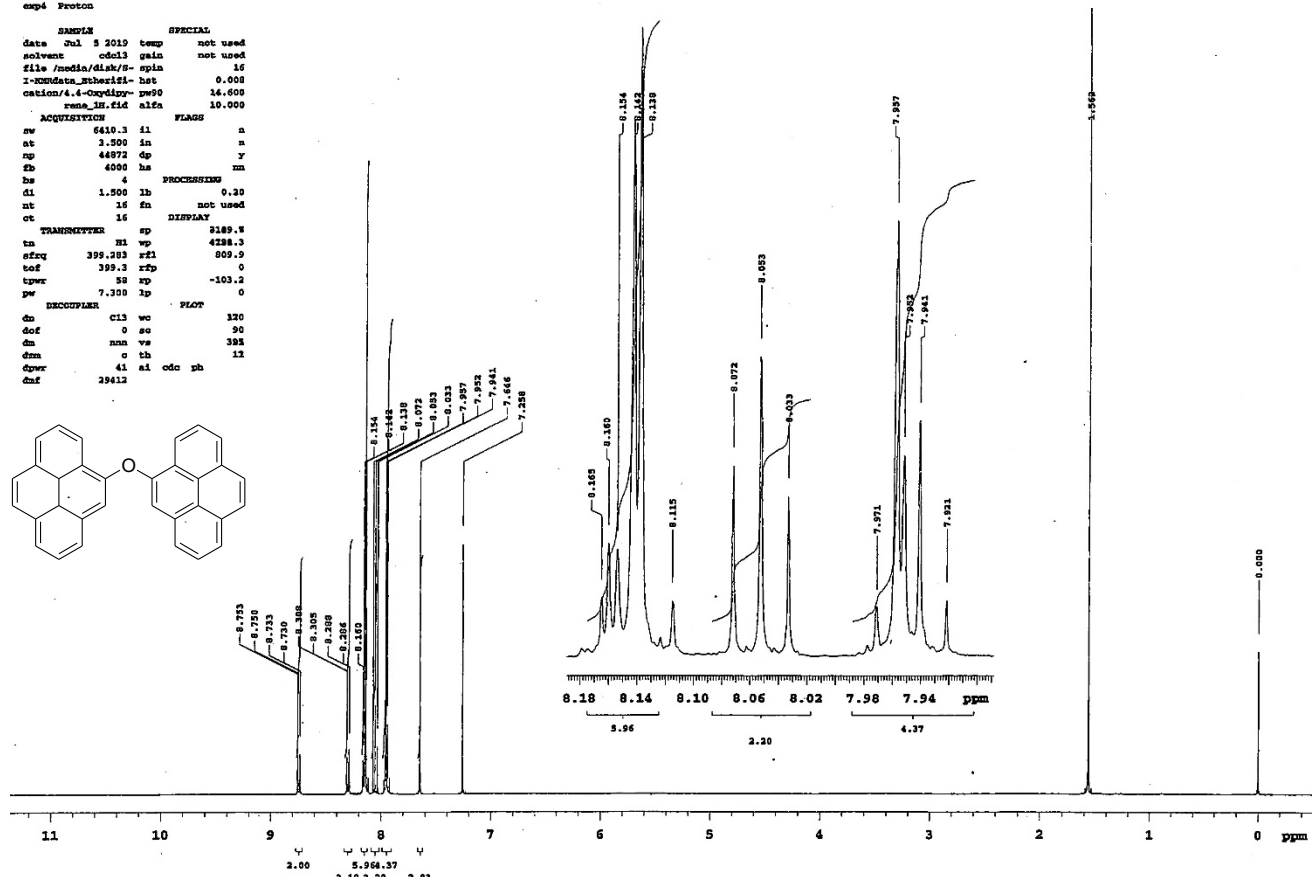

# 4,4'-Oxybispyrene (2m) <sup>13</sup>C-NMR

exp4 Carbon

| SAMPLE               |                     | SPECIAL |          |
|----------------------|---------------------|---------|----------|
| date                 | Jul 5 2019          | temp    | not used |
| solvent              | cdcl3               | gain    | not used |
| file                 | /media/disk/8- spin |         | 16       |
| 2-nmdata_chnrifi-    | hut                 |         | 0.008    |
| cation/4,4'-Oxybipy- | pw50                |         | 13.100   |
| name_13c.fid         | alfa                |         | 10.000   |
| ACQUISITION          |                     | FLAGS   |          |
| sv                   | 24509.8             | fl      | n        |
| at                   | 1.300               | in      | n        |
| sp                   | 63750               | dp      | y        |
| sb                   | 17000               | hs      | nm       |
| bs                   | 16                  |         |          |
| di                   | 0.700               | lb      | 1.00     |
| nt                   | 25000               | fn      | not used |
| ct                   | 18289               | display |          |
| TRANSMITTER          |                     | SP      |          |
| tn                   | C13                 | wp      | 7530.5   |
| afreq                | 100.610             | rfl     | 9444.7   |
| tof                  | 1028.8              | rfd     | 7730.7   |
| tpwr                 | 60                  | sp      | 47.7     |
| pw                   | 6.850               | lp      | 0        |
| DECOUPLER            |                     | F10F    |          |
| dn                   | H1                  | wo      | 270      |
| dcf                  | 100.0               | so      | 9        |
| dm                   | YY                  | vs      | 32249    |
| dmm                  | w                   | th      | 35       |
| dqwr                 | 42                  | ni      | cdc      |
| dmf                  | 3592                | ph      |          |

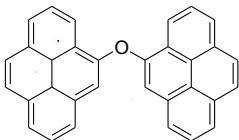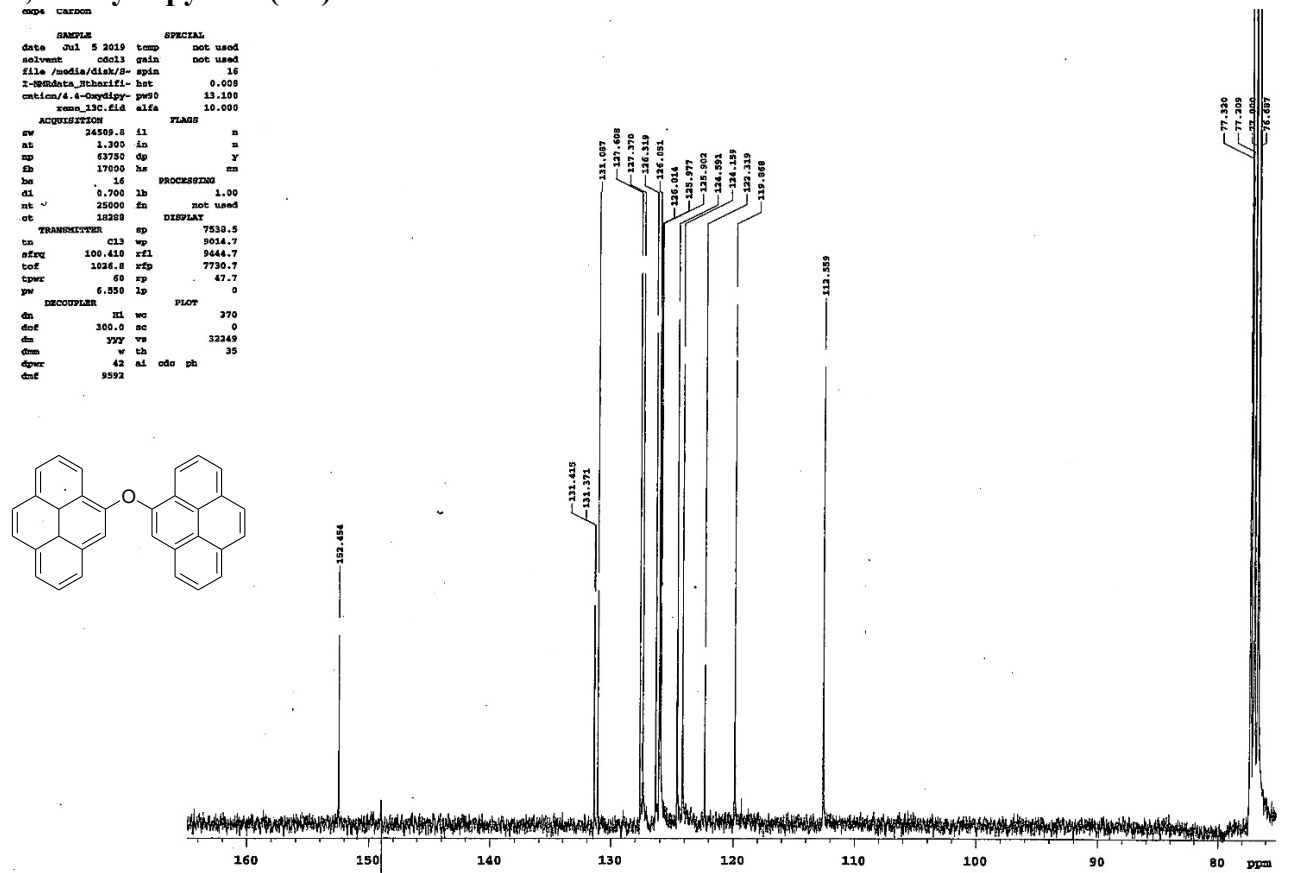

# 9-(3-Fluorophenoxy)phenanthrene (4a) <sup>1</sup>H-NMR

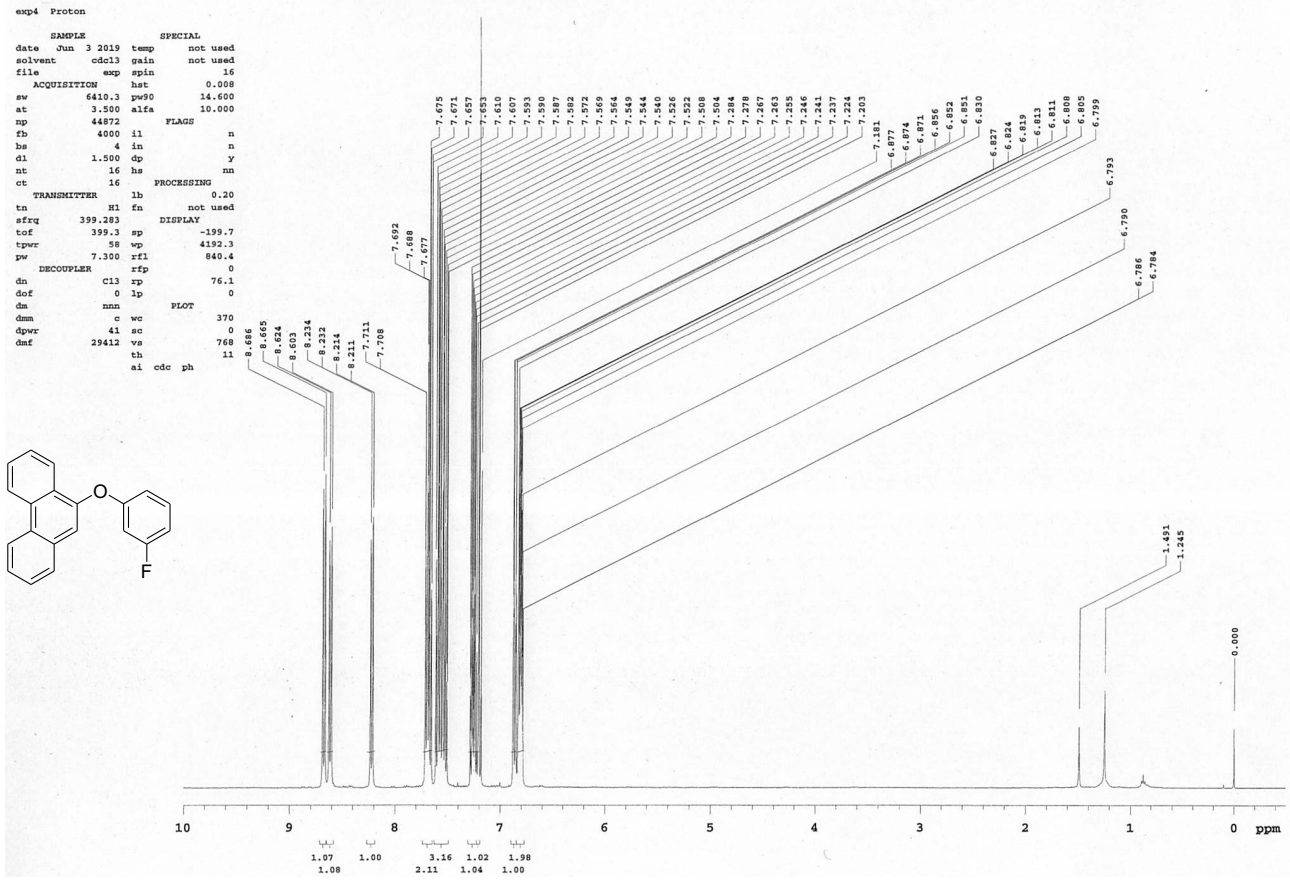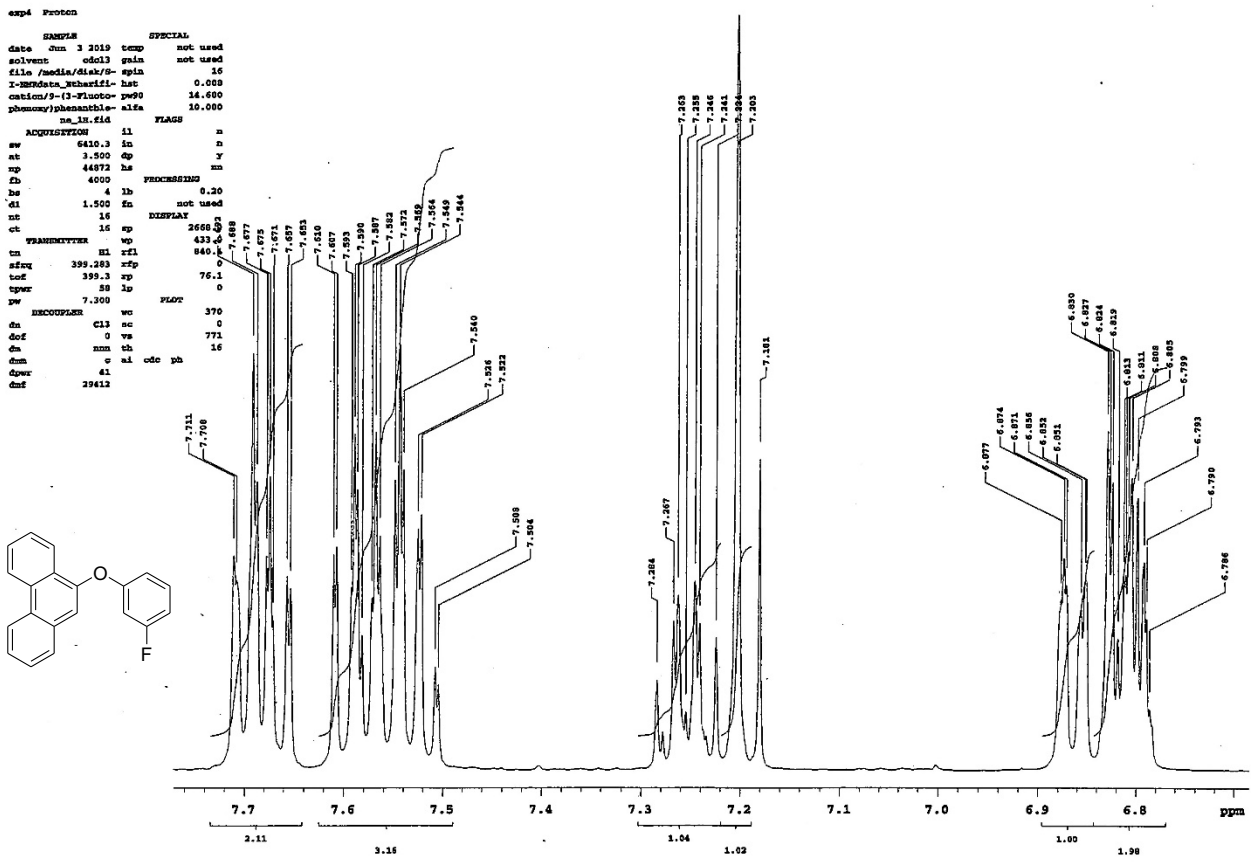

# 9-(3-Fluorophenoxy)phenanthrene (4a) <sup>13</sup>C-NMR

exp4 Carbon

```

SAMPLE          SPECIAL
date Jul 17 2019 temp not used
solvent cdcl3 gain not used
file          exp spin 16
ACQUISITION   has 0.000
nu 24509.8 pw90 13.100
at 1.300 alfa 10.000
mp 63750 FLAGS
ch 17000 il n
hs 16 in n
dl 0.700 dp y
nt 10240 hs mn
ct 2100

TRANSMITTER lb PROCESSING 1.00
tn C13 fn not used
sfrq 100.610 DISPLAY
tof 1026.8 sp 7445.0
tprz 50 wp 8024.2
pw 6.550 rfl 9446.2
DECOUPLER rfp 7730.7
dn H1 xp 57.0
dof 100.0 lp 0
dm YYY PLOT
dms w wc 370
dprz 42 sc 0
dmf 9592 vs 7450
al cdc ph 19
  
```

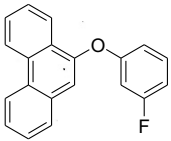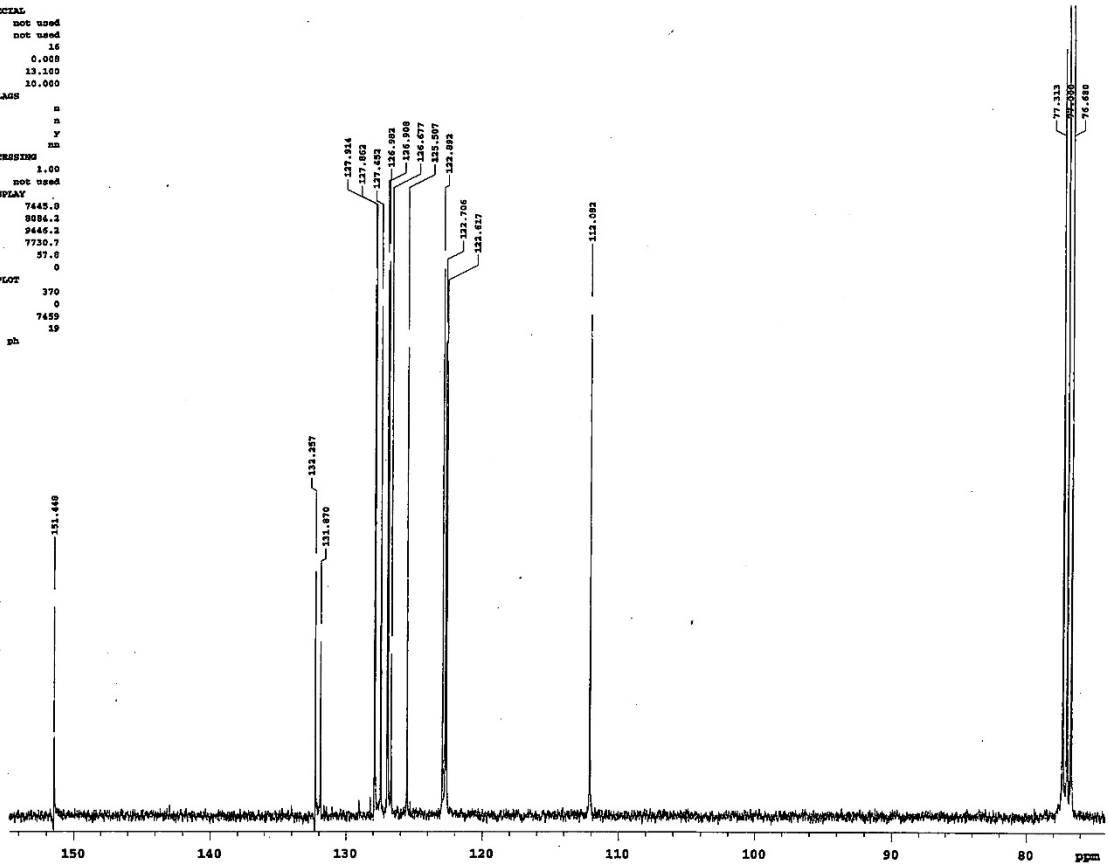

# 9-(3-Fluorophenoxy)phenanthrene (4a) <sup>19</sup>F-NMR

exp4 Fluorine

```

SAMPLE          SPECIAL
date Jul 17 2019 temp not used
solvent cdcl3 gain not used
file /media/disk/19- spin 16
X-MODEData_Identifier has 0.000
cation/3-(3-Fluoro- pw90 10.000
phenoxy)phenanthre- alfa 10.000
no_19F_fid FLAGS
ACQUISITION il n
nu 119047.6 in n
at 0.600 dp y
mp 142850 hs mn
ch 51800 PROCESSING 1.20
hs 4 lb not used
dl 4.400 dn
nt 16 DISPLAY
ct 16 sp -45239.6
TRANSMITTER wp 6559.2
tn F19 rfl 59276.0
sfrq 378.671 rfp -29480.3
tof 13604.2 sp 69.3
tprz 61 lp 0
pw 6.000 PLOT
dn H1 xc 370
dof 0 vs 307
dm mma th 52
dms 0 al ph
dprz 41
dmf 29413
  
```

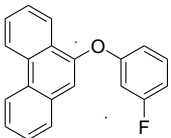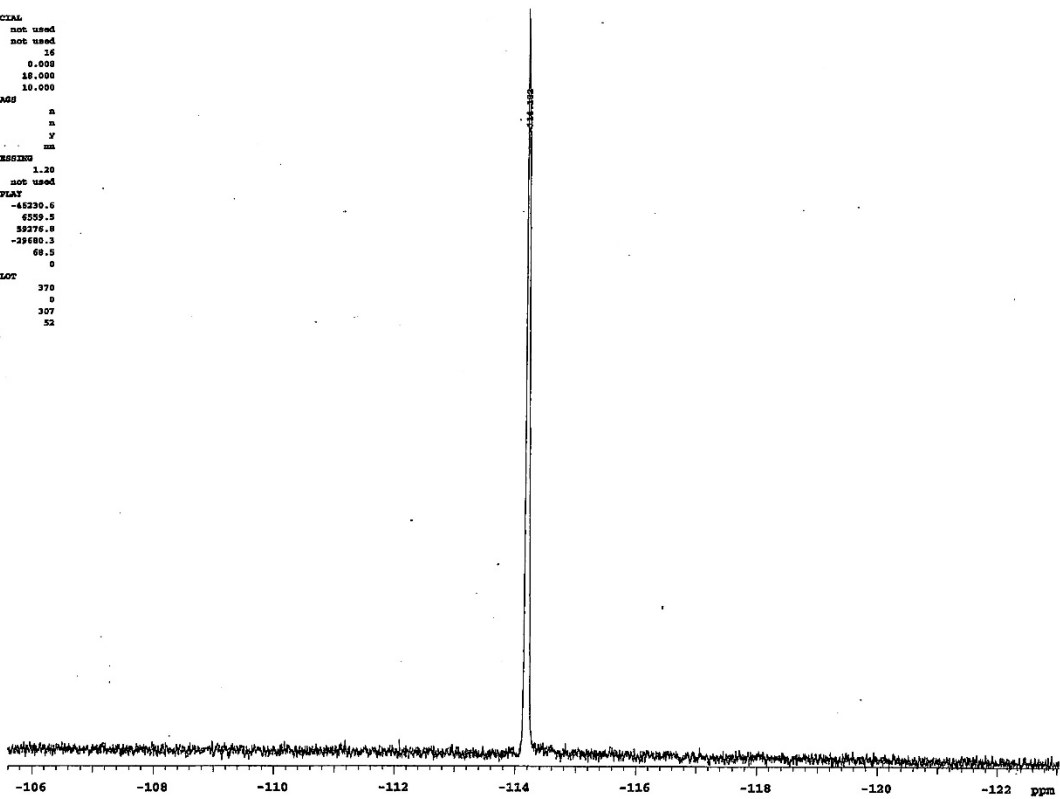

# 9-(4-Chlorophenoxy)phenanthrene (4b) <sup>1</sup>H-NMR

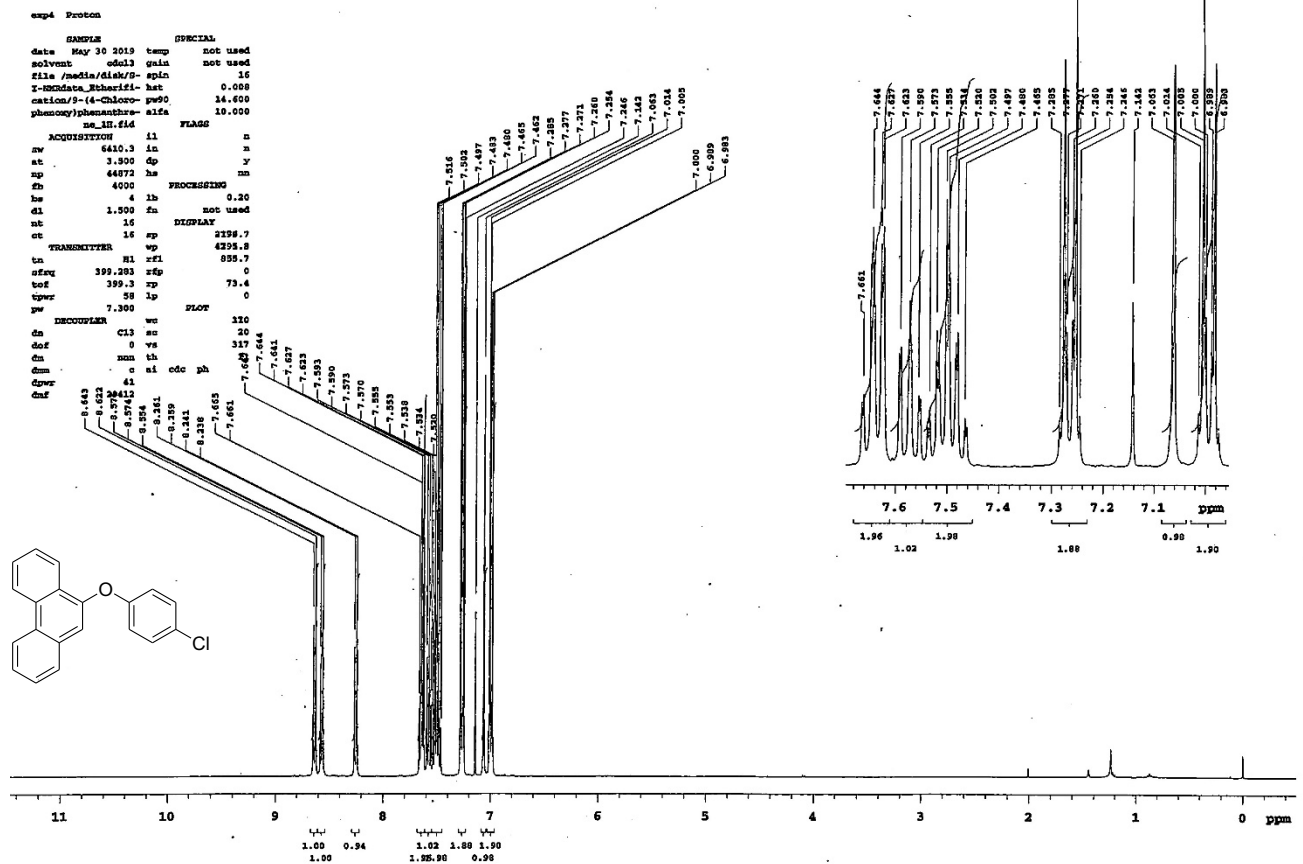

# 9-(4-Chlorophenoxy)phenanthrene (4b) <sup>13</sup>C-NMR

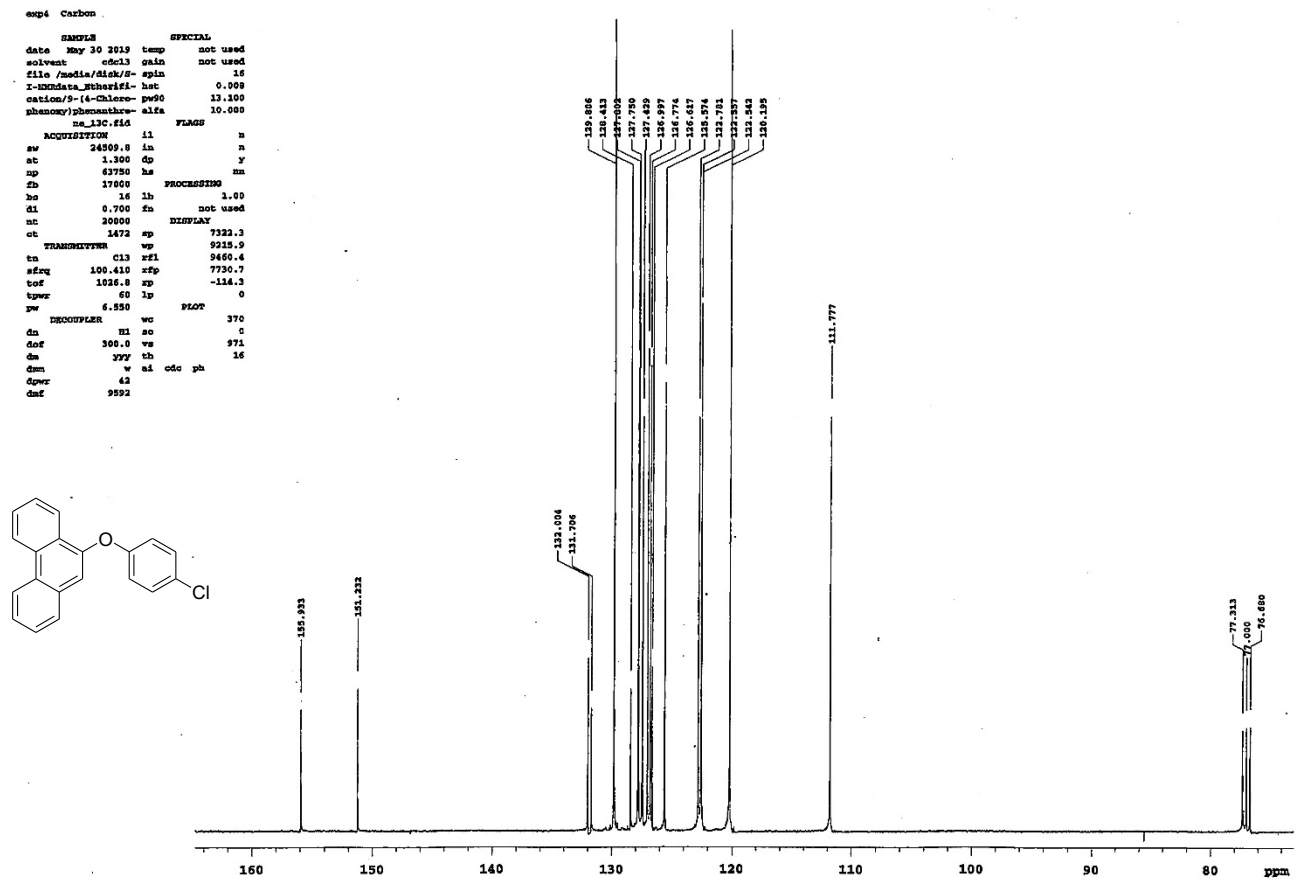

# 9-(4-Methoxyphenoxy)phenanthrene (4c) <sup>1</sup>H-NMR

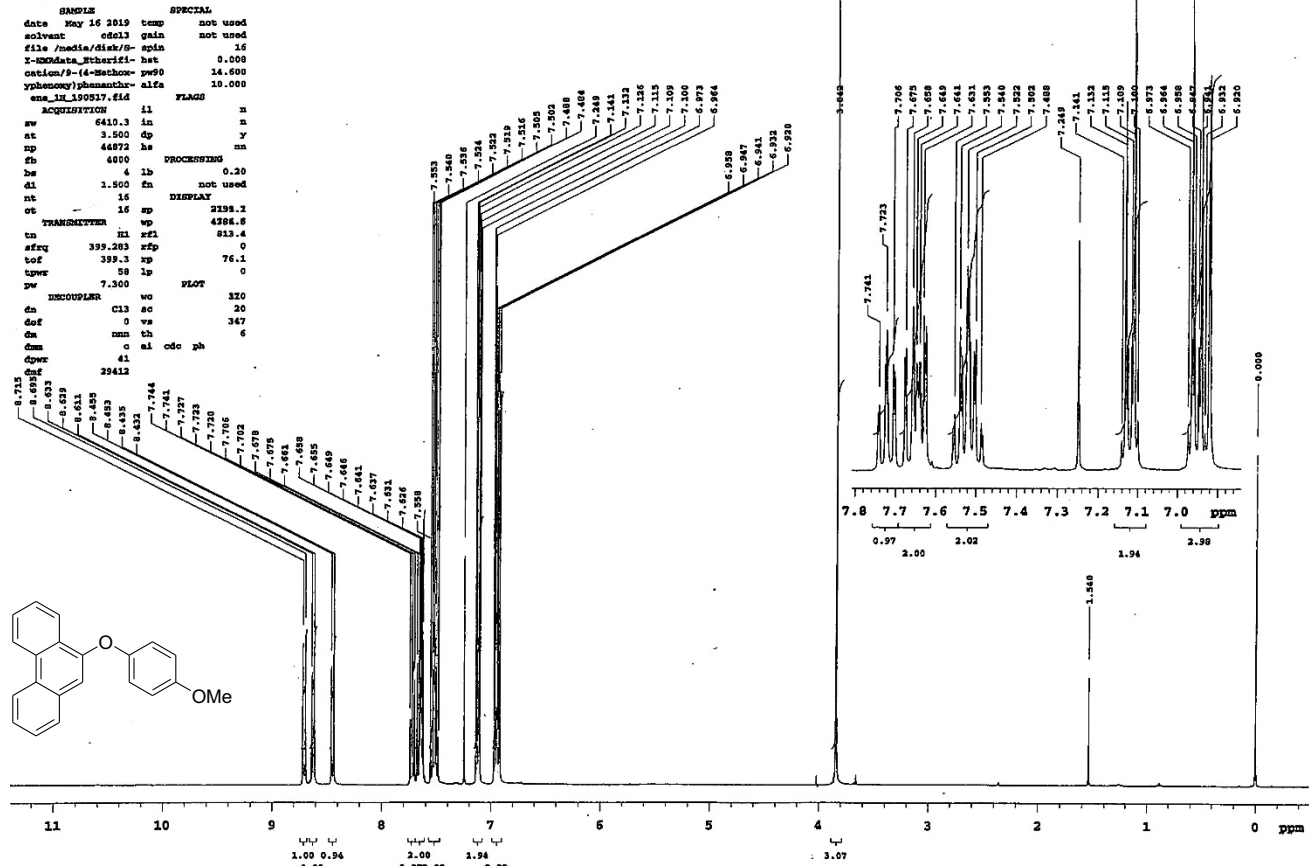

# 9-(4-Methoxyphenoxy)phenanthrene (4c) <sup>13</sup>C-NMR

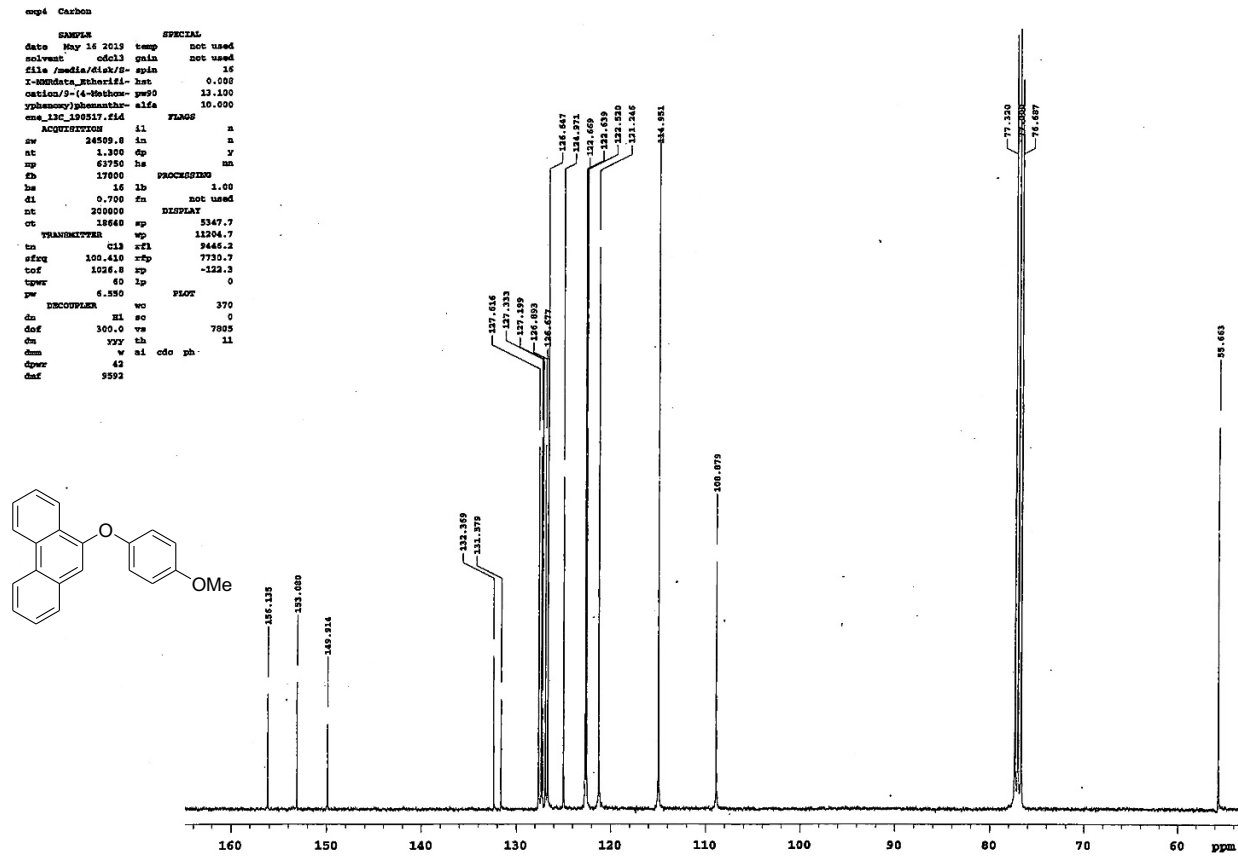

### 9-((6-Chloronaphthalen-2-yl)oxy)phenanthrene (4d) <sup>1</sup>H-NMR

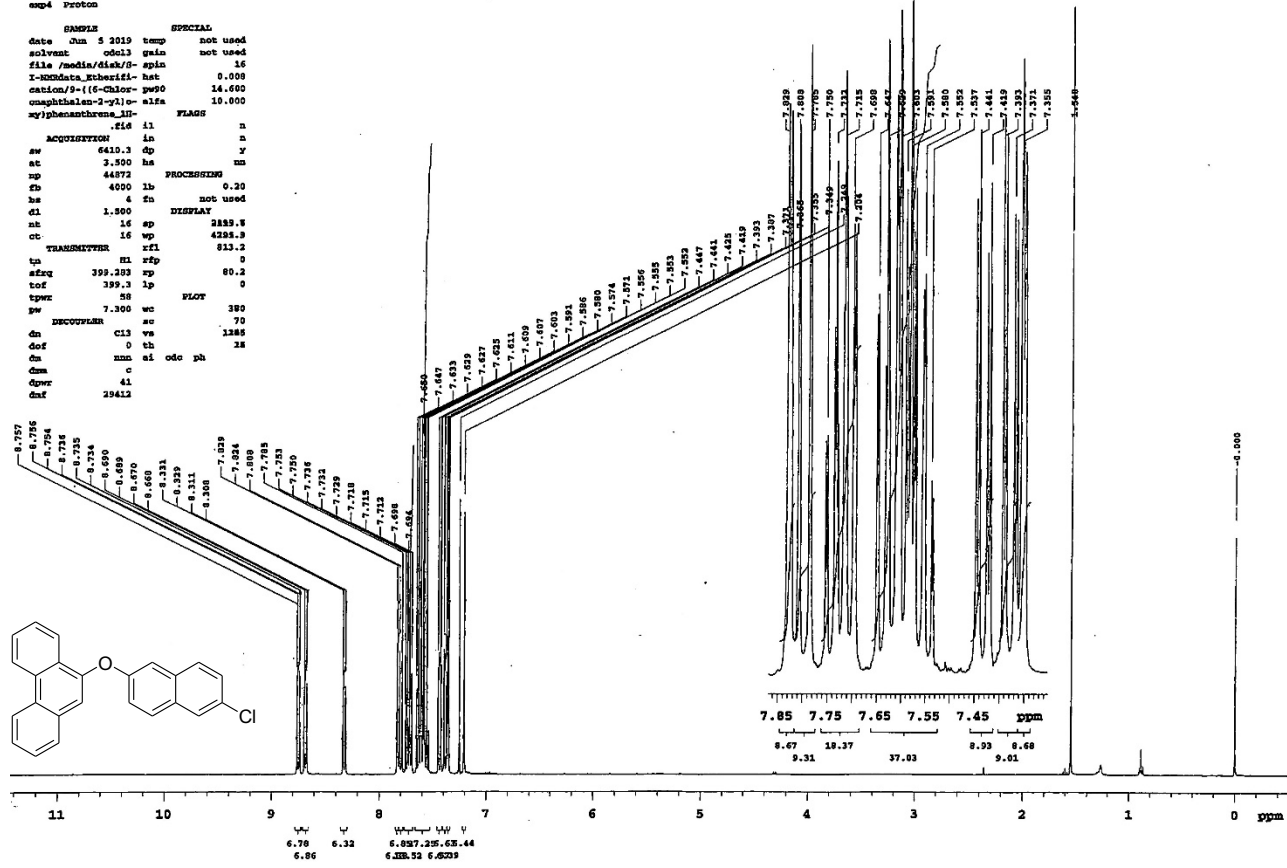

### 9-((6-Chloronaphthalen-2-yl)oxy)phenanthrene (4d) <sup>13</sup>C-NMR

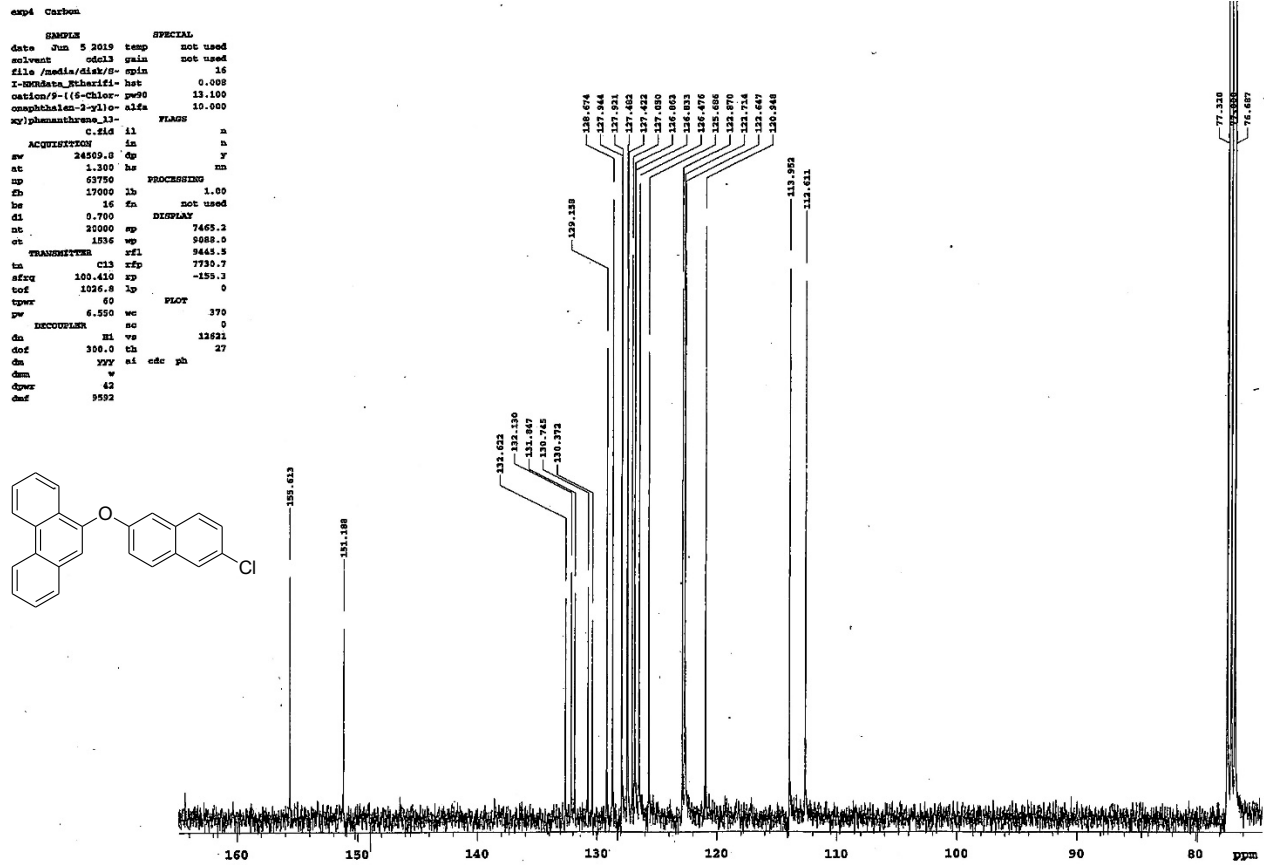

# 9-((4-Chloronaphthalen-1-yl)oxy)phenanthrene (4e) <sup>1</sup>H-NMR

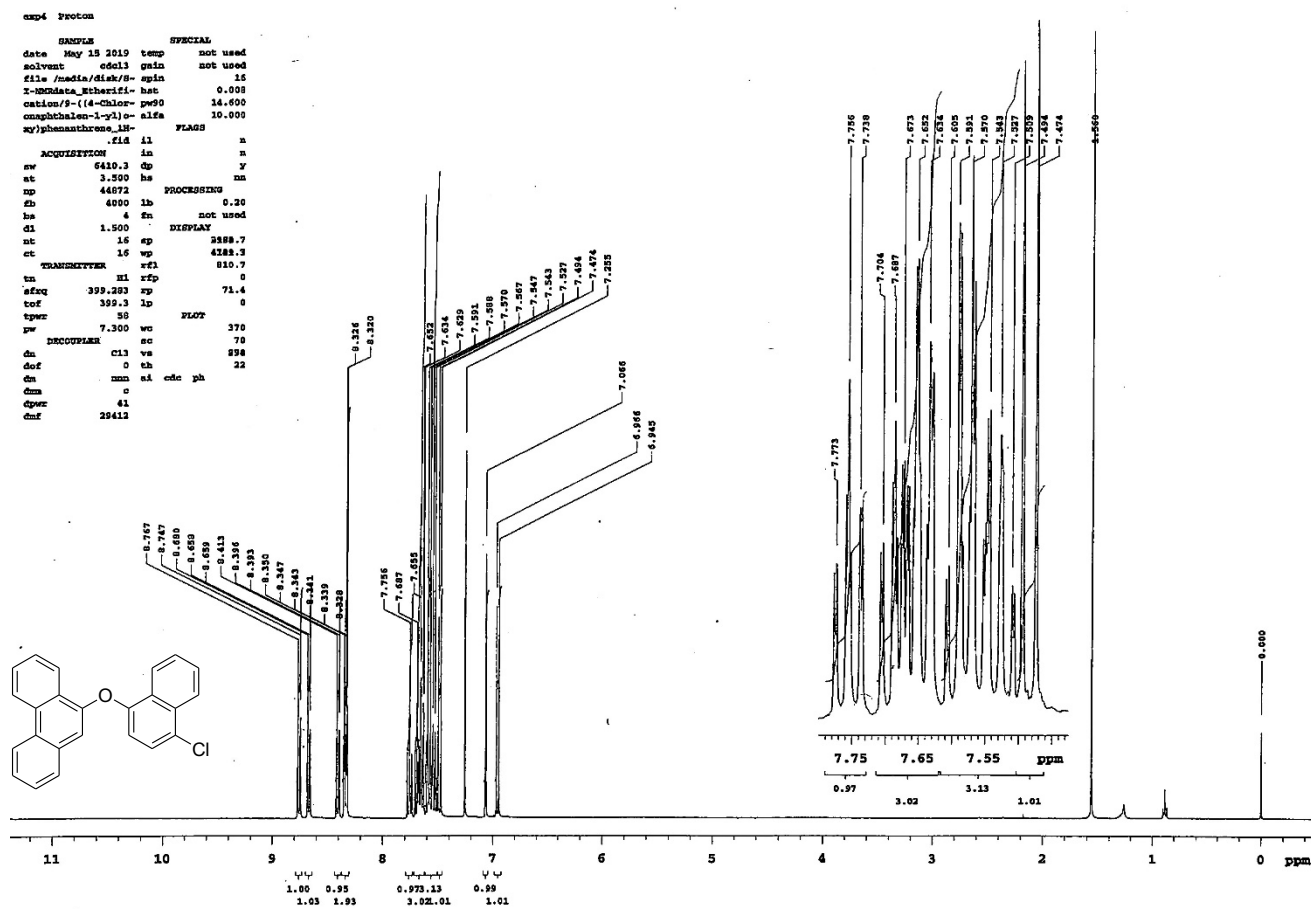

# 9-((4-Chloronaphthalen-1-yl)oxy)phenanthrene (4e) <sup>13</sup>C-NMR

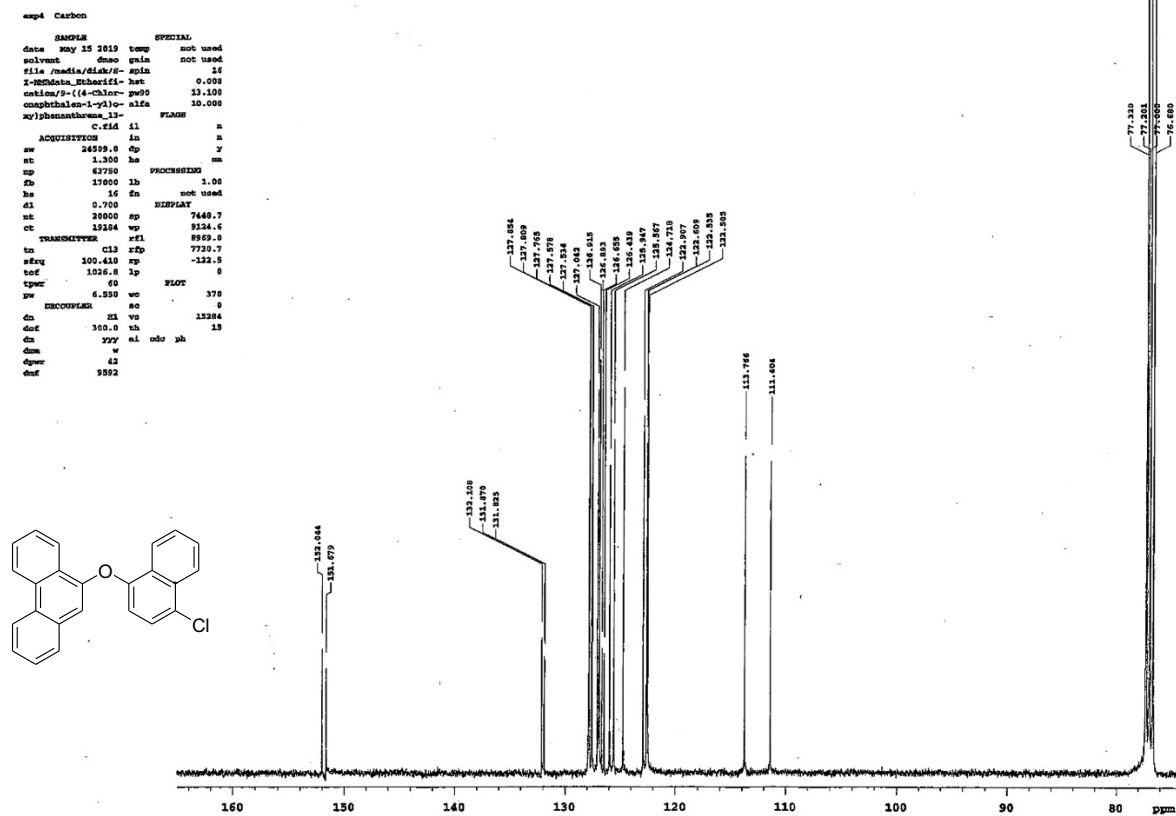



# 9-((6,7-Dibromonaphthalen-1-yl)oxy)phenanthrene (4f) <sup>1</sup>H-NMR

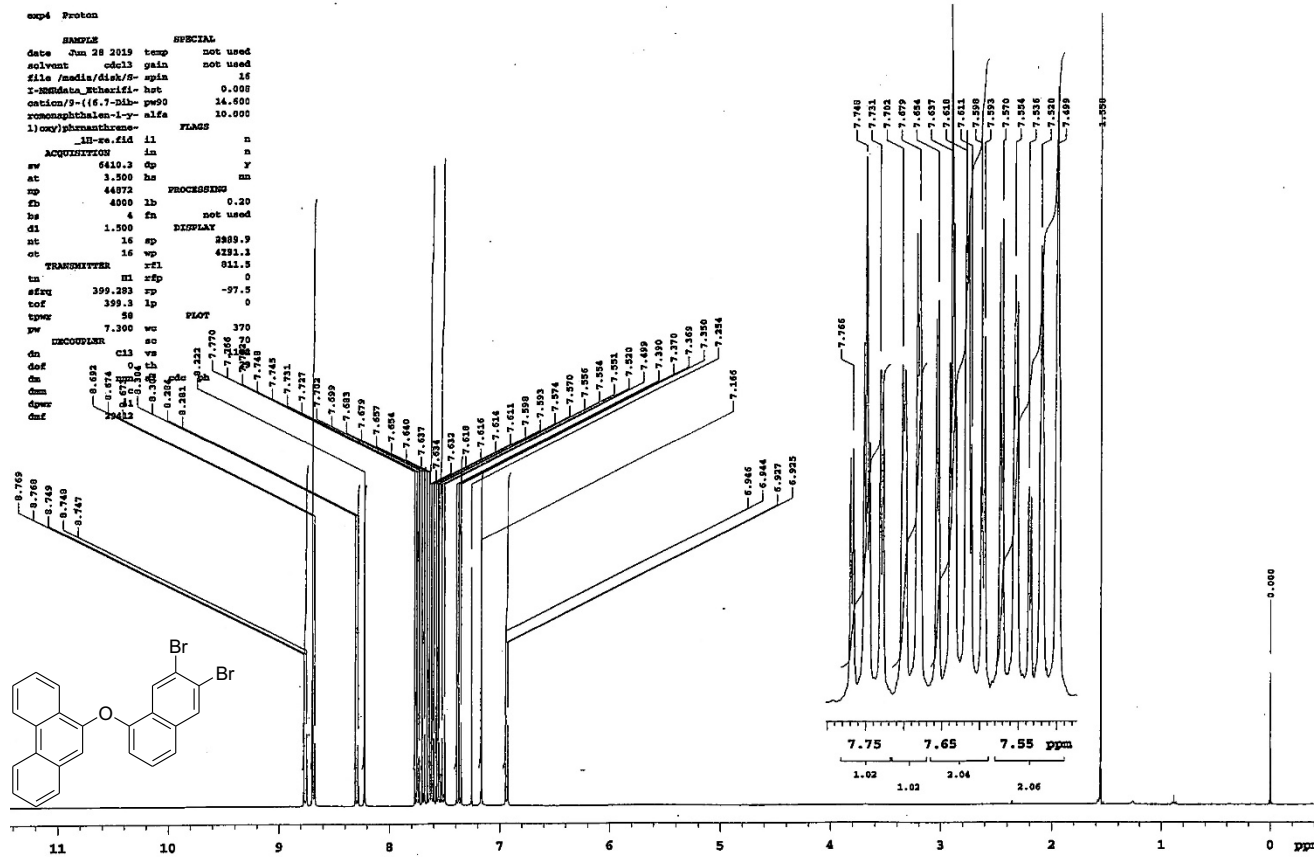

# 9-((6,7-Dibromonaphthalen-1-yl)oxy)phenanthrene (4f) <sup>13</sup>C-NMR

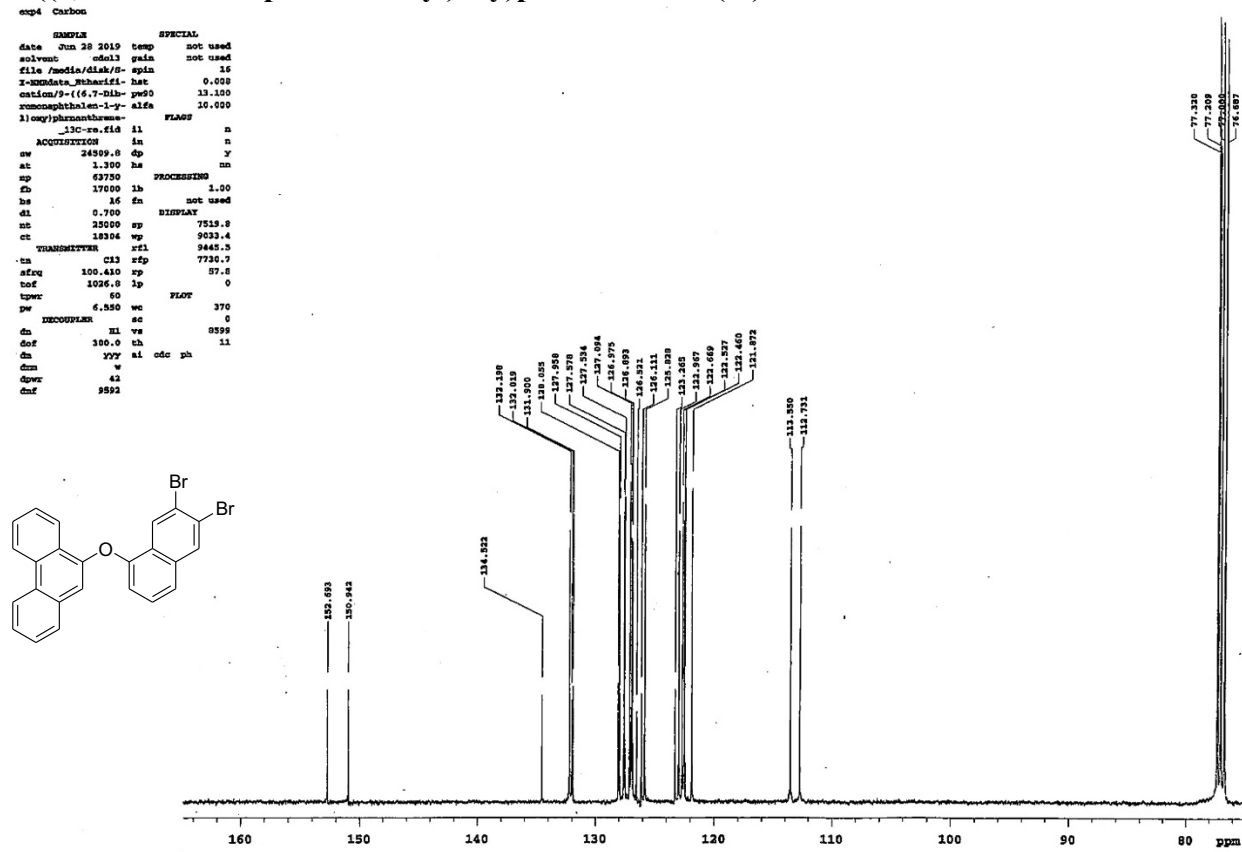

## 2-(Phenanthren-9-yloxy)phenanthrene (4g) <sup>1</sup>H-NMR

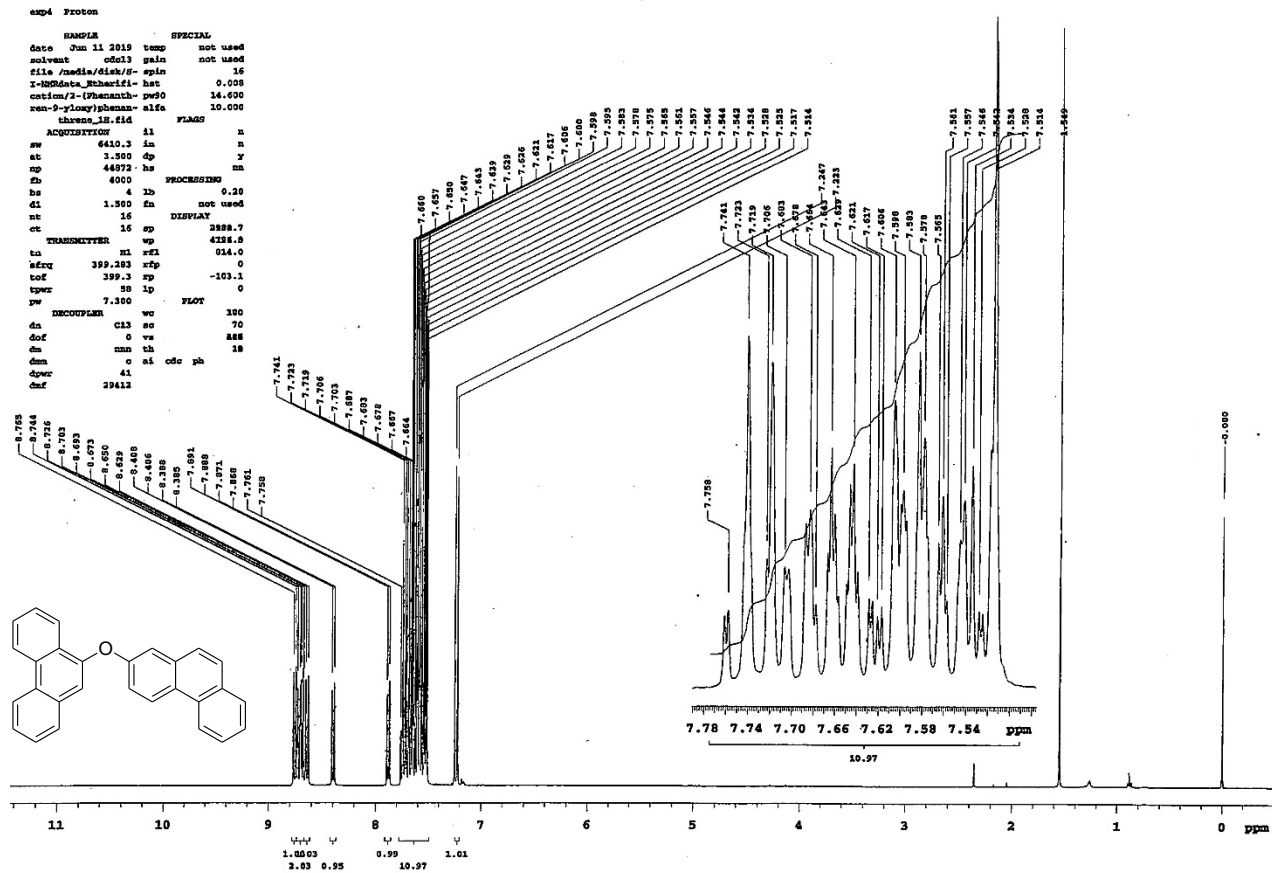

## 2-(Phenanthren-9-yloxy)phenanthrene (4g) <sup>13</sup>C-NMR

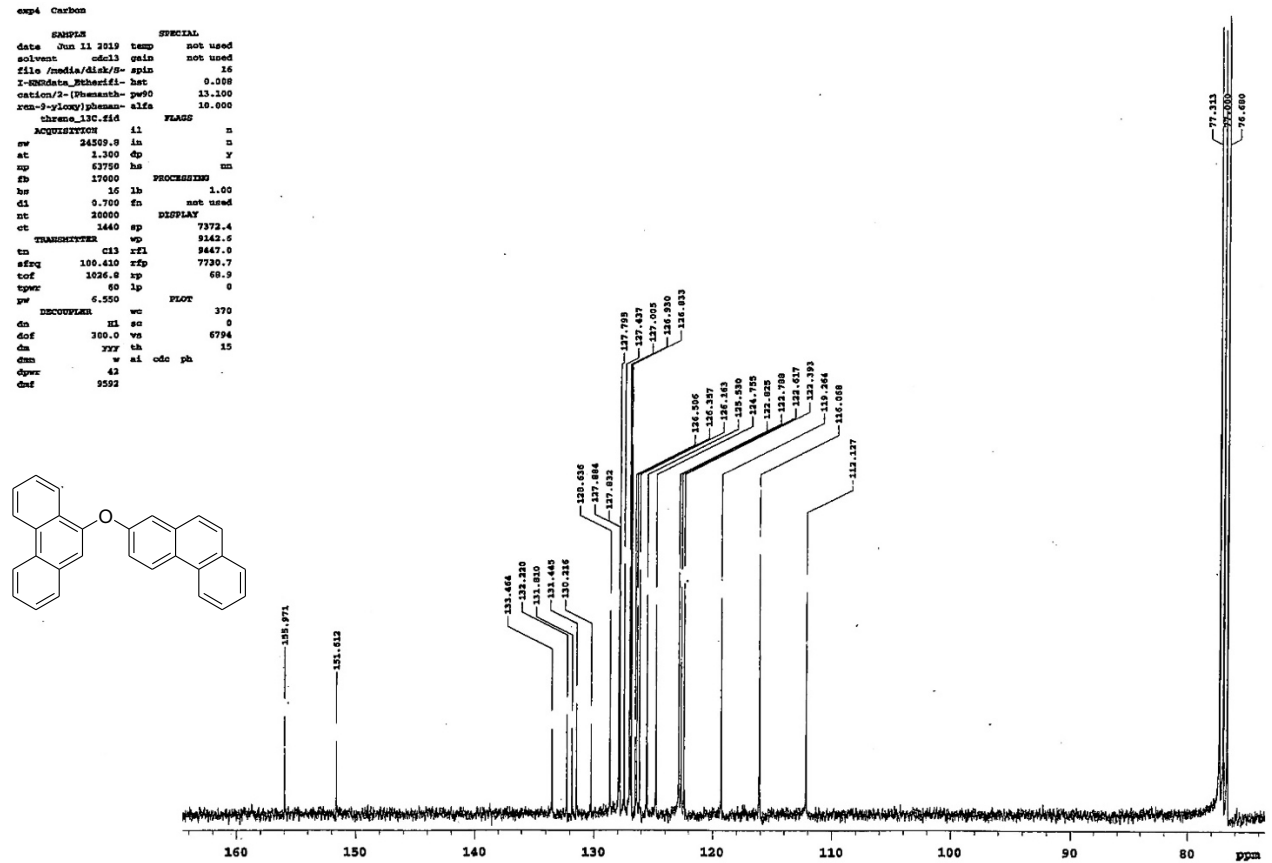

# 2-(Phenanthren-9-yloxy)triphenylene (4h) <sup>1</sup>H-NMR

exp4 Proton

```
SAMPLE SPECIAL
date Jul 10 2019 temp not used
solvent cdcl3 gain not used
file /media/disk/r- spin 16
I-NOData_Rcharif- hst 0.008
cation/2-(Phenanthren-9-yloxy)triphenylene_1h.fid
ren-9-yloxy)triphenylene_1h.fid
ACQUISITION FLAG n
sw 6410.3 in n
at 3.300 dp y
f2 44872 hs nm
f3 4000 PROCESSING
hs 4 lb 0.20
di 1.500 fn not used
nt 16 DISPLAY
ot 16 sp 2392.5
TRANSMITTER wp 4352.5
tn H1 rf1 809.7
sfreq 399.283 rfp 0
tof 399.3 rp -104.0
tqwr 58 lp 0
pw 7.300 F1OT
RECOUPLER wc 390
dn C13 so 70
dof 0 ve 239
dn mm kh 12
dnn g ai cdo ph
dpcw 41
dmf 29412
```

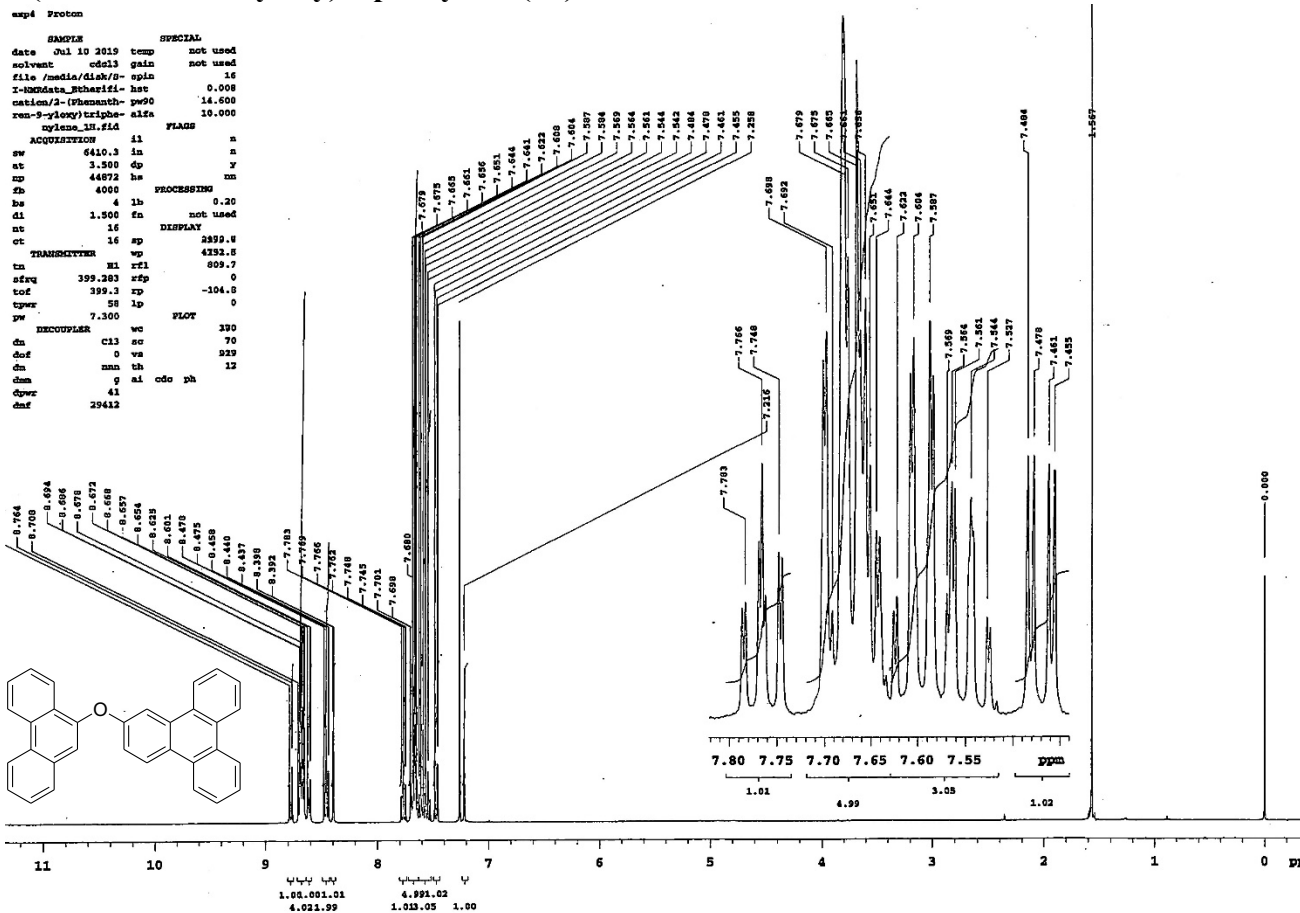

# 2-(Phenanthren-9-yloxy)triphenylene (4h) <sup>13</sup>C-NMR

exp4 Carbon

```
SAMPLE SPECIAL
date Jul 9 2019 temp not used
solvent cdcl3 gain not used
file /media/disk/r- spin 16
I-NOData_Rcharif- hst 0.008
cation/2-(Phenanthren-9-yloxy)triphenylene_1h.fid
ren-9-yloxy)triphenylene_1h.fid
ACQUISITION FLAG n
sw 24509.8 in n
at 1.300 dp y
f2 63750 hs nm
f3 17000 PROCESSING
hs 16 lb 1.00
di 0.700 fn not used
nt 25000 DISPLAY
ot 19024 sp 7519.8
TRANSMITTER wp 9233.4
tn H1 rf1 9445.3
sfreq 100.610 rfp 7730.7
tof 1026.8 rp 53.7
tqwr 60 lp 0
pw 6.550 F1OT
RECOUPLER wc 370
dn H1 so 0
dof 300.0 ve 31402
dn mm kh 17
dnn w ai cdo ph
dpcw 43
dmf 9392
```

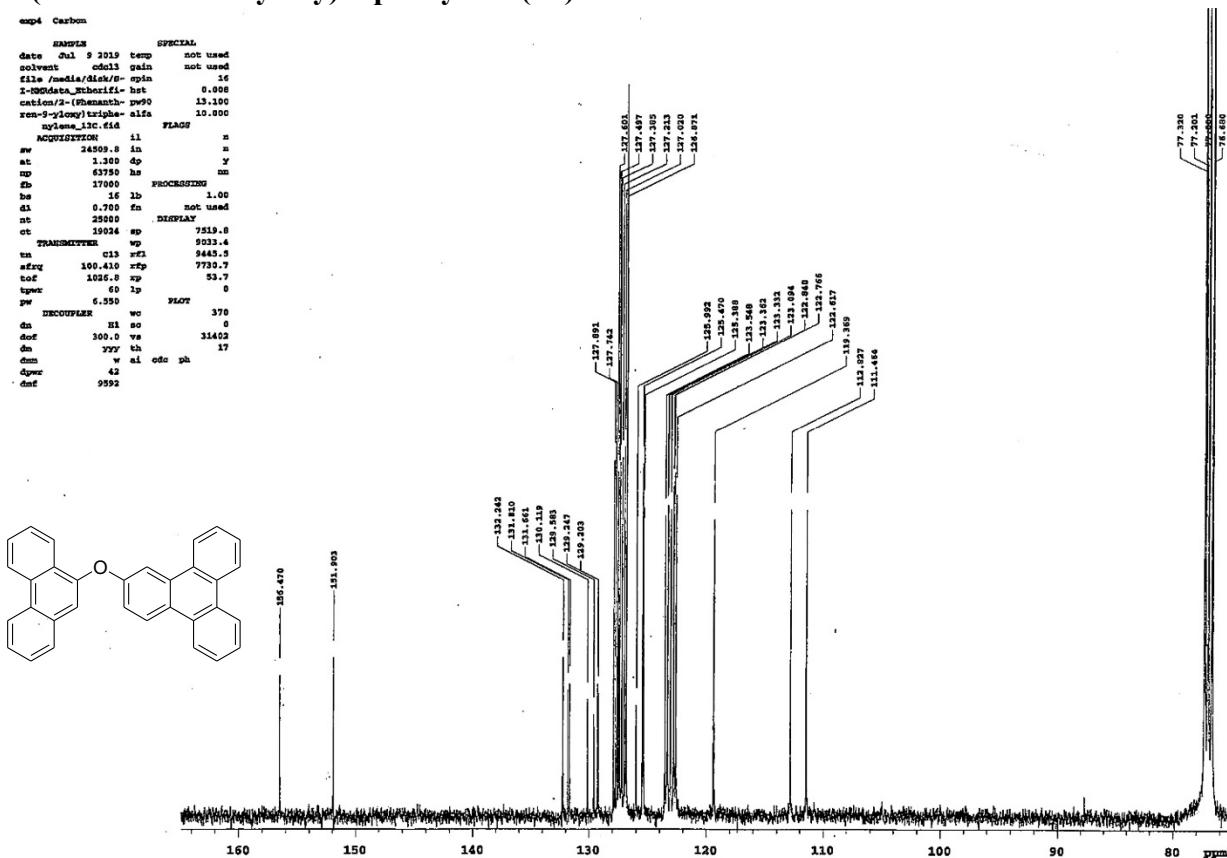

# 1-(Phenanthren-9-yloxy)pyrene (4i) <sup>1</sup>H-NMR

exp4 Proton

```

SAMPLE          SPECIAL
date Jul 9 2019 temp not used
solvent cdcl3 gain not used
file /media/disk/s- spin 16
X-MMRData_Michaeli-hat 0.008
cation/1-(Phenanth- py90 14.600
ren-9-yloxy)pyrene- alfa 10.000
   .fid          FLAGS
ACQUISITION    i1      n
pw 6410.3 in      n
at 3.300 dp      y
sp 44872 hs      m
zb 4000          PROCESSING
bs 4 lb         not used
dl 1.500 fm      DISPLAY
nt 16          2898.1
ct 16          4798.8
TRANSMITTER    vp      813.3
tn 81 rfl
sfreq 399.283 rfp 0
tof 399.3 rp    -109.7
tpwr 80 lp      0
pw 7.300          PLOT
RECOUPLER      wc      320
dn C13 ac       70
dof 0 va        309
dm mm th
dmn w nl cdc ph 21
dpcr 41
dmf 29412
    
```

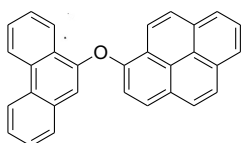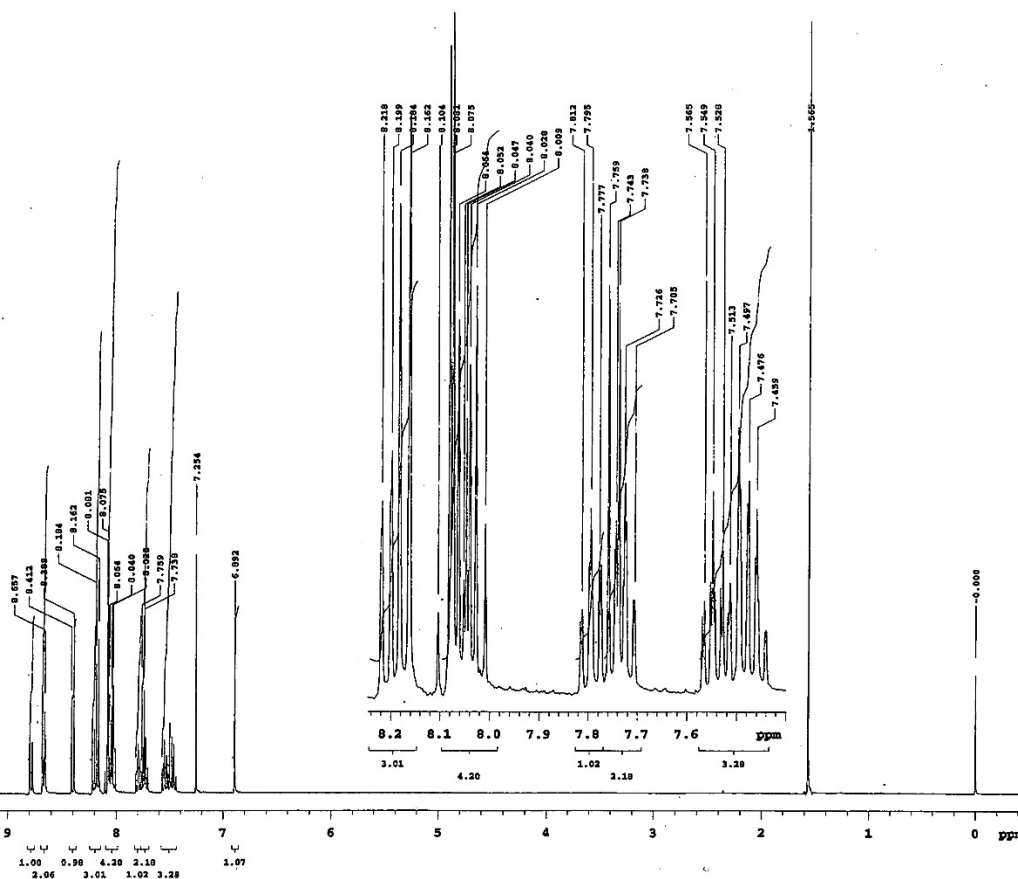

# 1-(Phenanthren-9-yloxy)pyrene (4i) <sup>13</sup>C-NMR

exp4 Carbon

```

SAMPLE          SPECIAL
date Jul 9 2019 temp not used
solvent cdcl3 gain not used
file /media/disk/s- spin 16
X-MMRData_Michaeli-hat 0.008
cation/1-(Phenanth- py90 14.600
ren-9-yloxy)pyrene- alfa 10.000
   .13c.fid      FLAGS
ACQUISITION    i1      n
pw 24509.8 in   n
at 1.300 dp     y
sp 63750 hs     m
zb 17000          PROCESSING
bs 15 lb        1.00
dl 0.700 fm     not used
nt 29000          DISPLAY
ct 10944 ap     7555.7
TRANSMITTER    wo     8030.9
tn 813 rfl      9446.2
sfreq 100.410 rfp 7730.7
tof 1026.0 rps 33.9
tpwr 60 lp      0
pw 6.550          PLOT
RECOUPLER      wc     370
dn C13 ac       20999
dof 300.0 va    20999
dm xxy th
dmn w nl cdc ph 20
dpcr 41
dmf 8592
    
```

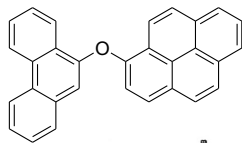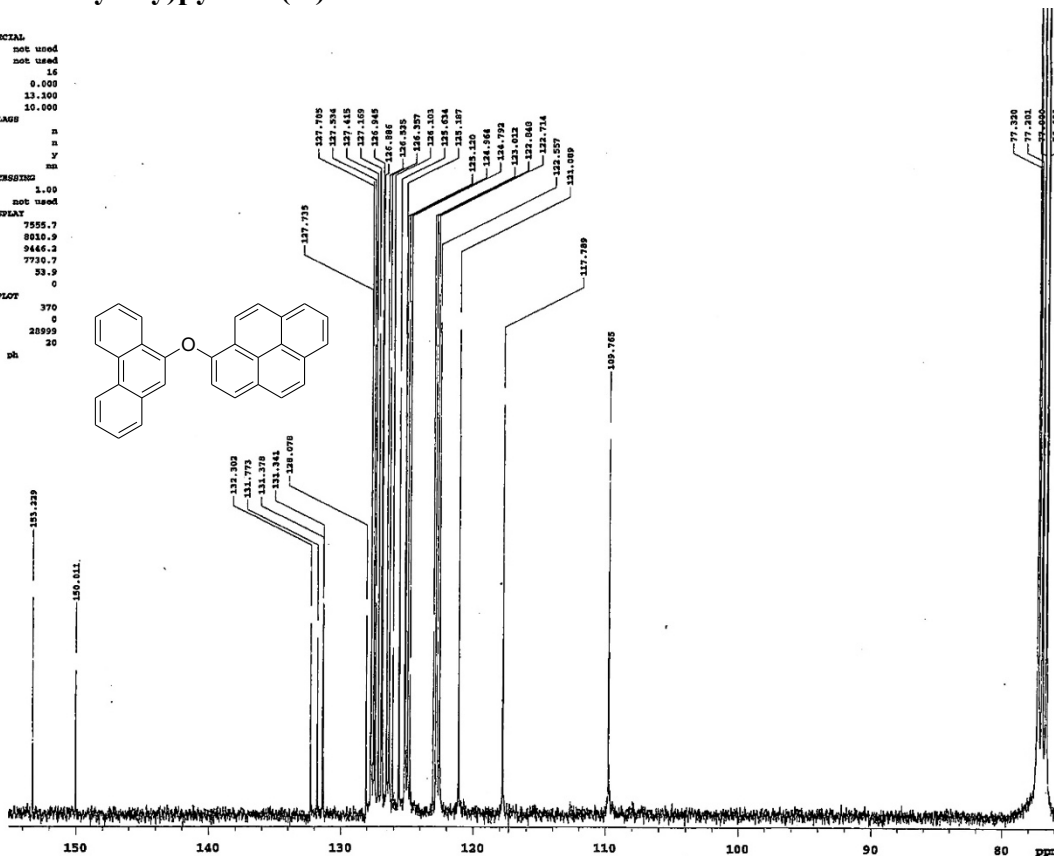

Supplement: c9cc07172e1.pdf [file c9cc07172e1.pdf]
